# Supplementary material for: Differences in evolutionary history translate into differences in invasion success of alien mammals in South Africa
Source: PubMed Central journal article supplement (PMC4201426; doi:10.1002/ece3.1031), 2014-04-30
Supplement: ece30004-2115-sd3.pdf [file ece30004-2115-sd3.pdf]

**GOVERNMENT NOTICE****DEPARTMENT OF ENVIRONMENTAL AFFAIRS AND TOURISM****No.****February 2006****NOTICE UNDER CHAPTER 5 OF THE  
NATIONAL ENVIRONMENTAL MANAGEMENT: BIODIVERSITY ACT  
(Act No. 10 of 2004)****LISTING OF ALIEN SPECIES AND INVASIVE SPECIES**

I, Marthinus van Schalkwyk, Minister of Environmental Affairs and Tourism, after consultation with the Cabinet Cluster, hereby:

- (1) in terms of section 67(1) of the Act, list in Appendix 1 the alien species or categories of alien species in respect of which a permit may not be issued;
- (2) in terms of section 66(1) of the Act, list in Appendix 2 the alien species or categories of alien species which may be exempted from a risk assessment and permit;
- (3) in terms of section 70(1)(a) of the Act, list in Appendix 3 the invasive species to which Chapter 5 of the Act applies nationally;
- (4) in terms of section 97(1)(c)(iii) of the Act, list in Appendix 4 the species or categories of alien species for which a permit from the receiving country is required before the species may be exported out of the country; and
- (5) in terms of section 97(1)(c)(iii) of the Act, list in Appendix 5 the species or categories of alien species for which there must be compulsory labelling before restricted activities may take place.

**M VAN SCHALKWYK***Minister of Environmental Affairs and Tourism***Explanatory note:**

*The listing of alien species and listed species is done within the Framework for the Assessment and Management of Risk of Alien and Invasive species (Schedule 3 to the National Environmental Management: Biodiversity Act Regulations on Alien and Invasive Species). This requires a science-based approach to the listing process; regular updating of the lists, and scope to appeal against the listing of species or activities. The economic implications of a potential introduction may also be factored into the decision-making process. The lists that appear here are the initially assessed species. It is anticipated that it will take a further two years to have considered the most key species for possible listing, after which listing will take place on a regular basis, as the need arises. The lists will be reviewed following public comment. Further scope to comment will be made, as the lists are developed. Certain of the taxa lists are still being considered, and will be released at a later stage. This is indicated under the relevant taxa in the lists. Please note that the Author Names for species, and the common names for species in Afrikaans and African languages, will also be given in the final version of these lists.*

## CONTENTS

- Appendix 1: Species Listed as Prohibited Alien Species**
- 1.1 Mammals
  - 1.2 Birds
  - 1.3 Reptiles
  - 1.4 Amphibians
  - 1.5 Fishes (Fresh-water)
  - 1.6 Fishes (Marine)
  - 1.7 Other Marine Species
  - 1.8 Invertebrates (Fresh-water)
  - 1.9 Invertebrates (Terrestrial)
    - 1.9.1 Molluscs
    - 1.9.2 Nematodes
    - 1.9.3 Insects
    - 1.9.4 Mites
    - 1.9.5 Spiders
  - 1.10 Plants
  - 1.11 Microbes
- Appendix 2: Species Listed as Permitted Alien Species**
- 3.1 Mammals
  - 3.2 Birds
  - 3.3 Reptiles
  - 3.4 Amphibians
  - 3.5 Fishes (Fresh-water)
  - 3.6 Fishes (Marine) and other Marine Species
  - 3.7 Invertebrates (Fresh Water)
  - 3.8 Invertebrates (Terrestrial)
  - 3.9 Plants
  - 3.10 Microbes
- Appendix 3: Species Listed as Invasive Species**
- 4.1 Mammals
  - 4.2 Birds
  - 4.3 Reptiles
  - 4.4 Amphibians
  - 4.5 Fishes (Fresh-water)
  - 4.6 Fishes (Marine)
  - 4.7 Other Marine Species
  - 4.8 Invertebrates
  - 4.9 Plants
  - 4.10 Microbes
- Appendix 4: Species Listed as Known to be Invasive Elsewhere in the World**
- 5.1 Mammals
  - 5.2 Birds
  - 5.3 Reptiles
  - 5.4 Amphibians
  - 5.5 Fishes (Fresh-water)
  - 5.6 Fishes (Marine)
  - 5.7 Other Marine Species
  - 5.8 Invertebrates
  - 5.9 Plants
  - 5.10 Microbes
- Appendix 5: Species Listed as Potentially Invasive Elsewhere in the World**
- 6.1 Mammals
  - 6.2 Birds
  - 6.3 Reptiles
  - 6.4 Amphibians
  - 6.5 Fishes (Fresh-water)
  - 6.6 Fishes (Marine)
  - 6.7 Other Marine Species
  - 6.8 Invertebrates
  - 6.9 Plants
  - 6.10 Microbes

## Appendix 1

### Species Listed as Prohibited Alien Species

A list of species that are prohibited for introduction into South Africa is outlined below. These are species for which an assessment has been made that they have a high risk of causing significant negative impacts in the country, and that they are therefore prohibited from introduction. This list will be compiled over time by flagging taxa (species, genera or families) that are deemed to pose a high risk based on experience, both within South Africa, and within neighbouring countries and elsewhere in the world.

An applicant may, at his or her own cost, appeal against the listing of the species on the Prohibited Species list. This cost may be waived, should the appeal succeed.

The following species are listed as Prohibited Species:

#### 1.1 Mammals

| No | Species                           | Common Name                                                              |
|----|-----------------------------------|--------------------------------------------------------------------------|
| 1  | <i>Alcelaphus buselaphus</i>      | Red hartebeest (all subspecies with the exception of <i>A.b. caama</i> ) |
| 2  | <i>Bos frontalis</i>              | Gaur                                                                     |
| 3  | <i>Castor spp.</i>                | Beaver (all species)                                                     |
| 4  | <i>Erinaceus europaeus</i>        | European hedgehog                                                        |
| 5  | <i>Felis catus</i>                | Feral cat (off-shore islands)                                            |
| 6  | <i>Giraffa camelopardalis</i>     | Giraffe (all subspecies excluding <i>capensis</i> )                      |
| 7  | <i>Herpestes javanicus</i>        | Small Indian mongoose (off-shore islands)                                |
| 8  | <i>Hippotragus niger varianii</i> | Giant sable (except in breeding zoos)                                    |
| 9  | <i>Kobus kafuensis</i>            | Kafue lechwe                                                             |
| 10 | <i>Kobus kob</i>                  | Kob                                                                      |
| 11 | <i>Kobus megaceros</i>            | Nile lechwe                                                              |
| 12 | <i>Macaca fascicularis</i>        | Crab-eating macaque                                                      |
| 13 | <i>Mustela erminea</i>            | Short-tailed weasel / Stoat                                              |
| 14 | <i>Oryctolagus cuniculus</i>      | European rabbit (Islands)                                                |
| 15 | <i>Oryx beisa</i>                 | Beisa oryx                                                               |
| 16 | <i>Rattus exulans</i>             | Pacific/Polynesian rat (off-shore islands)                               |
| 17 | <i>Redunca redunca</i>            | Bohor reedbuck                                                           |
| 18 | <i>Suncus murinus</i>             | Asian/Indian musk shrew                                                  |
| 19 | <i>Trichosurus vulpecula</i>      | Brush-tail possum                                                        |
| 20 | <i>Vulpes vulpes</i>              | Red fox                                                                  |

#### 1.2 Birds

| No | Species                          | Common Name          |
|----|----------------------------------|----------------------|
| 1  | <i>Acridotheres cristatellus</i> | Crested myna         |
| 2  | <i>Acridotheres fuscus</i>       | Jungle myna          |
| 3  | <i>Alectoris rufa</i>            | Red-legged partridge |
| 4  | <i>Callipepla californica</i>    | California quail     |
| 5  | <i>Callipepla gambelii</i>       | Gambel's quail       |
| 6  | <i>Callipepla squamata</i>       | Scaled quail         |
| 7  | <i>Carduelis carduelis</i>       | European goldfinch   |
| 8  | <i>Carduelis chloris</i>         | European greenfinch  |
| 9  | <i>Carduelis flammea</i>         | Common redpoll       |
| 10 | <i>Carpodacus mexicanus</i>      | House finch          |
| 11 | <i>Colinus cristatus</i>         | Crested quail        |
| 12 | <i>Colinus virginianus</i>       | Northern bobwhite    |

|    |                                       |                             |
|----|---------------------------------------|-----------------------------|
| 13 | <i>Columba palumbus</i>               | Common wood-pigeon          |
| 14 | <i>Corvus brachyrhynchos</i>          | American crow               |
| 15 | <i>Corvus frugilegus</i>              | Rook                        |
| 16 | <i>Corvus monedula</i>                | Eurasian jackdaw            |
| 17 | <i>Eleutherodactylus coqui</i>        | Puerto Rican coqui          |
| 18 | <i>Emberiza citrinella</i>            | Yellowhammer                |
| 19 | <i>Foudia madagascariensis</i>        | Madagascar red fody         |
| 20 | <i>Francolinus pondicerianus</i>      | Grey francolin              |
| 21 | <i>Gracula religiosa</i>              | Hill myna                   |
| 22 | <i>Icterus pectoralis</i>             | Spot-breasted oriole        |
| 23 | <i>Lonchura malacca</i>               | Indian black-headed manikin |
| 24 | <i>Lonchura punctulata</i>            | Scaly-breasted munia        |
| 25 | <i>Molothrus ater</i>                 | Brown-headed cowbird        |
| 26 | <i>Molothrus bonariensis</i>          | Shiny cowbird               |
| 27 | <i>Oreortyx pictus</i>                | Mountain quail              |
| 28 | <i>Oxyura jamaicensis</i>             | Northern ruddy duck         |
| 29 | <i>Oxyura leucocephala</i>            | White-headed duck           |
| 30 | <i>Passer hispaniolensis</i>          | Spanish sparrow             |
| 31 | <i>Passer montanus</i>                | Eurasian tree sparrow       |
| 32 | <i>Perdix perdix</i>                  | Grey partridge              |
| 33 | <i>Phasianus colchicus</i>            | Ring-necked pheasant        |
| 34 | <i>Pycnonotus cafer</i>               | Red-vented bulbul           |
| 35 | <i>Pycnonotus jocosus</i>             | Red-whiskered bulbul        |
| 36 | <i>Sicalis flaveola</i>               | Saffron finch               |
| 37 | <i>Streptopelia picturata</i>         | Madagascar turtle-dove      |
| 38 | <i>Struthio camelus molybdophanus</i> | North African ostrich       |
| 39 | <i>Turdus merula</i>                  | Blackbird                   |
| 40 | <i>Turdus philomelos</i>              | Song thrush                 |
| 41 | <i>Zenaida asiatica</i>               | White-winged dove           |

### 1.3 Reptiles

| No | Species                          | Common Name               |
|----|----------------------------------|---------------------------|
| 1  | <i>Agama agama</i>               | Common agama              |
| 2  | <i>Anolis distichus</i>          | Bark anole                |
| 3  | <i>Anolis sagrei</i>             | Brown anole               |
| 4  | <i>Basiliscus vittatus</i>       | Basilisk                  |
| 5  | <i>Boiga irregularis</i>         | Brown tree snake          |
| 6  | <i>Chelydra macroclemys</i>      | Alligator snapper turtle  |
| 7  | <i>Geochelone sulcata</i>        | Spur thighed tortoise     |
| 8  | <i>Hemidactylus frenatus</i>     | House gecko               |
| 9  | <i>Hemidactylus garnotti</i>     | Indo-Pacific gecko        |
| 10 | <i>Hemidactylus turcicus</i>     | Mediterranean gecko       |
| 11 | <i>Leiocephalus carinatus</i>    | Northern curlytail lizard |
| 12 | <i>Macrochelys temminckii</i>    | Snapper turtle            |
| 13 | <i>Tarentola mauritanica</i>     | Moorish wall gecko        |
| 14 | <i>Trachemys scripta elegans</i> | Red-eared slider          |

### 1.4 Amphibians

| No | Species                               | Common Name             |
|----|---------------------------------------|-------------------------|
| 1  | <i>Ambystoma tigrinum</i>             | Tiger salamander        |
| 2  | <i>Bufo bufo</i>                      | European toad           |
| 3  | <i>Bufo marinus</i>                   | Cane toad / Marine toad |
| 4  | <i>Eleutherodactylus planirostris</i> | Greenhouse frog         |
| 5  | <i>Litoria caerulea</i>               | Great green treefrog    |

|   |                                              |                    |
|---|----------------------------------------------|--------------------|
| 6 | <i>Notophthalmus viridescens viridescens</i> | Red-spotted newt   |
| 7 | <i>Osteopilus septentrionalis</i>            | Cuban treefrog     |
| 8 | <i>Rana catesbeiana</i>                      | American bull frog |

### 1.5 Fishes (Fresh-water)

| No | Species                  | Common name     |
|----|--------------------------|-----------------|
| 1  | <i>Clarias batrachus</i> | walking catfish |

NB: The DoA list of fresh-water fishes, as agreed to with the industry, needs to be inserted here.

### 1.6 Fishes (Marine)

| No | Species           | Common name |
|----|-------------------|-------------|
| 1  | SEE POINT 1 BELOW |             |

NB: The DoA list of marine fishes, as agreed to with the industry, needs to be inserted here.

### 1.7 Other Marine Species

| No | Species                    | Common name       |
|----|----------------------------|-------------------|
| 1  | <i>Caulerpa taxifolia</i>  | Caulerpa          |
| 2  | <i>Undaria pinnatifida</i> | Asian kelp        |
| 3  | <i>Eiochir sinensis</i>    | Asian mitten crab |
| 4  | <i>Asteria anamurensis</i> | Pacific seastar   |

### 1.8 Invertebrates (Fresh-water)

| No | Species                  | Common Name |
|----|--------------------------|-------------|
| 1  | <i>Cherax destructor</i> | Yabby       |

### 1.9 Invertebrates (Terrestrial)

#### 1.9.1 Mollusca (snails and molluscs)

| No | Species                                  | Common name         |
|----|------------------------------------------|---------------------|
| 1  | <i>Achatina fulica</i> Bowdich, 1822     | Giant African snail |
| 2  | <i>Euglandina rosea</i> (Férussac, 1821) | Rosy wolf snail     |

#### 1.9.2 Nematoda (nematodes)

| No | Species                                                                 | Common name                              |
|----|-------------------------------------------------------------------------|------------------------------------------|
| 1  | <i>Aphelenchoides fragariae</i> (Ritzema Bos, 1890) Christie, 1932      | Strawberry crimp disease nematode        |
| 2  | <i>Belonolaimus longicaudatus</i> Rau, 1958                             |                                          |
| 3  | <i>Bursaphelenchus xylophilus</i> (Steiner & Bühner, 1934) Nickel, 1970 | Pine wilt or Pine wood nematode          |
| 4  | <i>Globodera pallida</i> (Stone, 1973) Behrens, 1975                    | Pale cyst nematode, Potato cyst nematode |
| 5  | <i>Heterodera glycines</i> Ichinohe, 1952                               | Soybean cyst nematode                    |
| 6  | <i>Heterodera goettingiana</i> Liebscher, 1892                          | Pea cyst nematode                        |
| 7  | <i>Longidorus attenuatus</i> Hooper, 1961                               | Tomato docking disorder nematode         |
| 8  | <i>Longidorus elongatus</i> (De Man, 1876) Micoletzky, 1922             | Sugar beet docking disorder nematode     |
| 9  | <i>Paratrichodorus nanus</i> (Allen, 1957) Siddiqi, 1974                |                                          |
| 10 | <i>Paratrichodorus pachydermus</i> (Seinhorst, 1954) Siddiqi, 1974      |                                          |
| 11 | <i>Paratrichodorus tunisiensis</i> (Siddiqi, 1963) Siddiqi, 1974        |                                          |
| 12 | <i>Paratylenchus bukowinensis</i> Micoletzky, 1922                      |                                          |
| 13 | <i>Rhadinaphelenchus cocophilus</i> (Cobb, 1919) J.B. Goodey, 1960      | Red ring disease nematode                |
| 14 | <i>Scutellonema bradys</i> (Steiner & Lehw, 1933) Andrassy, 1958        | Yam nematode                             |
| 17 | <i>Trichodorus primitivus</i> (De Man, 1880) Micoletzky, 1922           |                                          |
| 18 | <i>Trichodorus similes</i> Steinhorst, 1963                             |                                          |
| 19 | <i>Trichodorus viruliferus</i> Hooper, 1963                             |                                          |

## 1.9.3 Insecta (insects)

|     | Species                                 | Family         |
|-----|-----------------------------------------|----------------|
| 1.  | <i>Aleurodicus destructor</i>           | Aleyrodidae    |
| 2.  | <i>Aleurodicus disperses</i>            | Aleyrodidae    |
| 3.  | <i>Amblypelta lutescens</i>             | Coccidae       |
| 4.  | <i>Anastrepha ludens</i>                | Tephritidae    |
| 5.  | <i>Anastrepha oblique</i>               | Tephritidae    |
| 6.  | <i>Anastrepha pseudoparallela</i>       | Tephritidae    |
| 7.  | <i>Anastrepha serpentine</i>            | Tephritidae    |
| 8.  | <i>Anastrepha striata</i>               | Tephritidae    |
| 9.  | <i>Anastrepha suspense</i>              | Tephritidae    |
| 10. | <i>Archips argyrospilis</i>             | Tortricidae    |
| 11. | <i>Argyrotaenia citrana</i>             | Tortricidae    |
| 12. | <i>Bactrocera zonata</i>                | Tephritidae    |
| 13. | <i>Bactrocera aquilonis</i>             | Tephritidae    |
| 14. | <i>Bactrocera carambolae</i>            | Tephritidae    |
| 15. | <i>Bactrocera caryeae</i>               | Tephritidae    |
| 16. | <i>Bactrocera correata</i>              | Tephritidae    |
| 17. | <i>Bactrocera curcubitae</i>            | Tephritidae    |
| 18. | <i>Bactrocera dorsalis</i>              | Tephritidae    |
| 19. | <i>Bactrocera facialis</i>              | Tephritidae    |
| 20. | <i>Bactrocera frauenfeldi</i>           | Tephritidae    |
| 21. | <i>Bactrocera jarvisi</i>               | Tephritidae    |
| 22. | <i>Bactrocera kandiensis</i>            | Tephritidae    |
| 23. | <i>Bactrocera kandiensisoccipitalis</i> | Tephritidae    |
| 24. | <i>Bactrocera kirki</i>                 | Tephritidae    |
| 25. | <i>Bactrocera latifrons</i>             | Tephritidae    |
| 26. | <i>Bactrocera melanota</i>              | Tephritidae    |
| 27. | <i>Bactrocera musae</i>                 | Tephritidae    |
| 28. | <i>Bactrocera neohumeralis</i>          | Tephritidae    |
| 29. | <i>Bactrocera occipitalis</i>           | Tephritidae    |
| 30. | <i>Bactrocera papayae</i>               | Tephritidae    |
| 31. | <i>Bactrocera passiflorae</i>           | Tephritidae    |
| 32. | <i>Bactrocera philippensis</i>          | Tephritidae    |
| 33. | <i>Bactrocera psidi</i>                 | Tephritidae    |
| 34. | <i>Bactrocera pyrifoliae</i>            | Tephritidae    |
| 35. | <i>Bactrocera tryoni</i>                | Tephritidae    |
| 36. | <i>Bactrocera xanthodes</i>             | Tephritidae    |
| 37. | <i>Castnia licoides</i>                 | Castniidae     |
| 38. | <i>Castnia penelope</i>                 | Castniidae     |
| 39. | <i>Ceroplastes floridensis</i>          | Coccidae       |
| 40. | <i>Chloropulvinaria polygnota</i>       | Coccidae       |
| 41. | <i>Choristoneura rosaceana</i>          | Tortricidae    |
| 42. | <i>Chrysodeixis eriosoma</i>            | Noctuidae      |
| 43. | <i>Cnephasia jactatana</i>              | Tortricidae    |
| 44. | <i>Colaspis hypochlora</i>              | Chrysomelidae  |
| 45. | <i>Conogethes punctiferalis</i>         | Pyralidae      |
| 46. | <i>Conopomorpha litchiella</i>          | Gracillariidae |
| 47. | <i>Cryptophlebia illepida</i>           | Tortricidae    |
| 48. | <i>Cryptophlebia onbrodelta</i>         | Tortricidae    |
| 49. | <i>Ctenopseustis obliquana</i>          | Tortricidae    |
| 50. | <i>Dudua aprobola</i>                   | Tortricidae    |
| 51. | <i>Dysmicoccus neobrevipes</i>          | Pseudococcidae |
| 52. | <i>Epiphyas postvittana</i>             | Tortricidae    |
| 53. | <i>Erionota thrax</i>                   | Hesperiidae    |
| 54. | <i>Holothrips ananasi</i>               | Thripidae      |
| 55. | <i>Lachnopus sp. near campechianus</i>  | Curculionidae  |
| 56. | <i>Lobesia aeolopa</i>                  | Tortricidae    |
| 57. | <i>Maconellicoccus hirsutus</i>         | Pseudococcidae |
| 58. | <i>Metamasius callizona</i>             | Curculionidae  |
| 59. | <i>Nacoleia octasema</i>                | Pyralidae      |
| 60. | <i>Neodecadarchis flavistriata</i>      | Tineidae       |
| 61. | <i>Odoiporus longicollis</i>            | Curculionidae  |
| 62. | <i>Phenacoccus madeirensis</i>          | Pseudococcidae |
| 63. | <i>Planococcoides njalensis</i>         | Pseudococcidae |
| 64. | <i>Planococcus litchi</i>               | Pseudococcidae |
| 65. | <i>Planococcus minor</i>                | Pseudococcidae |
| 66. | <i>Planotortix excessana</i>            | Tortricidae    |
| 67. | <i>Platynota stultana</i>               | Tortricidae    |
| 68. | <i>Proeulia auraria</i>                 | Tortricidae    |
| 69. | <i>Proeulia chrysopteris</i>            | Tortricidae    |
| 70. | <i>Pseudococcus calceolariae</i>        | Pseudococcidae |
| 71. | <i>Pseudococcus comstocki</i>           | Pseudococcidae |
| 72. | <i>Pseudococcus cryptus</i>             | Pseudococcidae |
| 73. | <i>Pseudococcus elisae</i>              | Pseudococcidae |

|     |                                    |                |
|-----|------------------------------------|----------------|
| 74. | <i>Pseudococcus jackbeardsleyi</i> | Pseudococcidae |
| 75. | <i>Rastrococcus iceryoides</i>     | Pseudococcidae |
| 76. | <i>Rastrococcus invadens</i>       | Pseudococcidae |
| 77. | <i>Rastrococcus mangiferae</i>     | Pseudococcidae |
| 78. | <i>Rastrococcus spinosus</i>       | Pseudococcidae |
| 79. | <i>Rhipiphorothrips cruentatus</i> | Thripidae      |
| 80. | <i>Spodoptera litura</i>           | Noctuidae      |
| 81. | <i>Sternochetus frigidus</i>       | Curculionidae  |
| 82. | <i>Thecla basilides</i>            | Lycaenidae     |
| 83. | <i>Thecla legota</i>               | Lycaenidae     |
| 84. | <i>Thrips hawaiiensis</i>          | Thripidae      |
| 85. | <i>Thrips palmi</i>                | Thripidae      |
| 86. | <i>Tmolus echion</i>               | Lycaenidae     |
| 87. | <i>Toxotrypana curvicauda</i>      | Aleyrodidae    |
| 88. | <i>Unaspis citri</i>               | Diaspididae    |
| 89. | <i>Vinsonia stellifera</i>         | Coccidae       |

**1.9.4 Acari (Mites)**

|    | Species                        | Family        |
|----|--------------------------------|---------------|
| 1  | <i>Tuckerella pavoniformis</i> | Tuckerellidae |
| 2  | <i>Calacarus brionesae</i>     | Eriophyidae   |
| 3  | <i>Cisaberoptus kenya</i>      | Eriophyidae   |
| 4  | <i>Tetranychus desertorum</i>  | Tetranychidae |
| 5  | <i>Tetranychus piercei</i>     | Tetranychidae |
| 6  | <i>Tetranychus mexicanus</i>   | Tetranychidae |
| 7  | <i>Oligonychus biharensis</i>  | Tetranychidae |
| 8  | <i>Oligonychus biharensis</i>  | Tetranychidae |
| 9  | <i>Oligonychus punicae</i>     | Tetranychidae |
| 10 | <i>Oligonychus yothersi</i>    | Tetranychidae |

**1.9.5 Arachnida (Spiders)**

|    | Species                          | Family and/or Common name                     |
|----|----------------------------------|-----------------------------------------------|
| 1  | <i>Acanthoscurria geniculata</i> | Theraphosidae Brazilian white knee tarantula  |
| 2  | <i>Avicularia aviculatria</i>    | Theraphosidae Pink toe tarantula              |
| 3  | <i>Brachypelma albopilosum</i>   | Theraphosidae Curly hair tarantula            |
| 4  | <i>Brachypelma smithi</i>        | Theraphosidae Mexican red knee tarantula      |
| 5  | <i>Brachypelma vegans</i>        | Theraphosidae Red rump tarantula              |
| 6  | <i>Grammostola rosae</i>         | Theraphosidae Chilean rose tarantula          |
| 7  | <i>Haplopelma lividum</i>        | Theraphosidae Cobalt blue tarantula           |
| 8  | <i>Lasiodora parahybana</i>      | Theraphosidae Brazilian salmon pink tarantula |
| 9  | <i>Poecilotheria regalis</i>     | Theraphosidae Indian ornamental tarantula     |
| 10 | <i>Psalmopoeus cambridgei</i>    | Theraphosidae Trinidad chevron tarantula      |
| 11 | <i>Theraphosa blondi</i>         | Theraphosidae Goliath bird eating tarantula   |

**1.10 Plants**

| No | Species                                                                                                                                | Common Name               |
|----|----------------------------------------------------------------------------------------------------------------------------------------|---------------------------|
| 1  | <i>Acaena pallida</i> (Kirk) Allan                                                                                                     | Pale biddy-biddy          |
| 2  | <i>Achnatherum caudatum</i> (Trin.) S.W.L.Jacobs & J.Everett                                                                           | Spear grass               |
| 3  | <i>Achnatherum brachychaetum</i> (Godr.) Barkworth (= <i>Nassella brachychaeta</i> (Godr.) Barkworth, <i>Stipa brachychaeta</i> Godr.) | Puna grass                |
| 4  | <i>Aegilops</i> spp.                                                                                                                   | Goat grass                |
| 5  | <i>Aegilops cylindrica</i> Host (= <i>Cylindropyrum cylindricum</i> (Host) Å.Löve, <i>Triticum cylindricum</i> (Host) Ces.             | Jointed goat grass        |
| 6  | <i>Aegilops geniculata</i> Roth (= <i>A. ovata</i> auct., <i>Triticum ovatum</i> auct.)                                                | Ovate goat grass          |
| 7  | <i>Aegilops triuncialis</i> L. (= <i>A. squarrosa</i> L., <i>Triticum triunciale</i> (L.) Raspail                                      | Barb goat grass           |
| 8  | <i>Aeginetia</i> spp.                                                                                                                  | Aeginetia                 |
| 9  | <i>Aeschynomene rudis</i> Benth.                                                                                                       | Rough joint-vetch         |
| 10 | <i>Allium paniculatum</i> L.                                                                                                           | Panicled onion            |
| 11 | <i>Allium vineale</i> L. (= <i>A. kochii</i> Lange)                                                                                    | Wild garlic               |
| 12 | <i>Alternanthera philoxeroides</i> (Mart.) Griseb.                                                                                     | Alligator weed            |
| 13 | <i>Ambrosia trifida</i> L.                                                                                                             | Giant ragweed             |
| 14 | <i>Andropogon bicornis</i> L.                                                                                                          | West Indian foxtail grass |
| 15 | <i>Andropogon virginicus</i> L.                                                                                                        | Broom-sedge               |
| 16 | <i>Annona glabra</i> L.                                                                                                                | Pond apple                |
| 17 | <i>Artemisia verlotiorum</i> Lamotte                                                                                                   | Mugwort                   |
| 18 | <i>Arundinaria</i> spp.                                                                                                                | Arundinaria reeds/bamboos |
| 19 | <i>Baccharis halimifolia</i> L.                                                                                                        | Groundsel bush            |
| 20 | <i>Berberis glaucocarpa</i> Stapf                                                                                                      | Barberry                  |
| 21 | <i>Bifora testiculata</i> (L.) Spreng. ( <i>Coriandrum testiculatum</i> L.)                                                            | Bifora                    |
| 22 | <i>Cabomba caroliniana</i> A.Gray                                                                                                      | Cabomba, Carolina fanwort |

|    |                                                                                                                                                                                                                                       |                                                                     |
|----|---------------------------------------------------------------------------------------------------------------------------------------------------------------------------------------------------------------------------------------|---------------------------------------------------------------------|
| 23 | <i>Cabomba</i> spp.                                                                                                                                                                                                                   | Cabomba                                                             |
| 24 | <i>Callistachys lanceolata</i> Vent. (= <i>Oxylobium lanceolatum</i> (Vent.) Druce)                                                                                                                                                   | Oxylobium                                                           |
| 25 | <i>Calluna vulgaris</i> (L.) Hull                                                                                                                                                                                                     | Heather                                                             |
| 26 | <i>Calotis lappulacea</i> Benth.                                                                                                                                                                                                      | Bur-daisy                                                           |
| 27 | <i>Lepidium draba</i> L. subsp. <i>chalepense</i> (L.) Thell. (= <i>Cardaria chalepensis</i> (L.) Hand.-Mazz)                                                                                                                         | Lens podded hoary cress                                             |
| 28 | <i>Lepidium appelianum</i> Al-Shehbaz (= <i>Cardaria pubescens</i> (C.A.Mey.) Jarm.                                                                                                                                                   | Globe-pod hoary cress                                               |
| 29 | <i>Carduus acanthoides</i> L.                                                                                                                                                                                                         | Plumeless thistle                                                   |
| 30 | <i>Carduus nutans</i> L.                                                                                                                                                                                                              | Musk thistle                                                        |
| 31 | <i>Carduus pycnocephalus</i> L.                                                                                                                                                                                                       | Italian thistle                                                     |
| 32 | <i>Carex buchananii</i> Bergg.                                                                                                                                                                                                        | New Zealand sedge                                                   |
| 33 | <i>Carex comans</i> Bergg. (= <i>C. albula</i> Allan)                                                                                                                                                                                 | New Zealand sedge                                                   |
| 34 | <i>Carex flagellifera</i> Colenso                                                                                                                                                                                                     | New Zealand sedge                                                   |
| 35 | <i>Carex longebrachiata</i> Boeckeler                                                                                                                                                                                                 | Australian sedge                                                    |
| 36 | <i>Carex testacea</i> Sol. ex Boott                                                                                                                                                                                                   | New Zealand sedge                                                   |
| 37 | <i>Carthamus leucocaulos</i> Sm.                                                                                                                                                                                                      | White-stem distaff thistle, Saffron thistle                         |
| 38 | <i>Carthamus oxyacanthus</i> M.Bieb. (= <i>C. flavescens</i> Willd.)                                                                                                                                                                  | Wild safflower                                                      |
| 39 | <i>Cassinia arcuata</i> R.Br.                                                                                                                                                                                                         | Chinese shrub, Drooping cassinia                                    |
| 40 | <i>Caulerpa taxifolia</i> (Vahl) C.Agardh                                                                                                                                                                                             | Notched caulerpa, Feather caulerpa                                  |
| 41 | <i>Celastrus orbiculatus</i> Thunb. (= <i>C. articulatus</i> Thunb.)                                                                                                                                                                  | Climbing spindleberry, Oriental bittersweet                         |
| 42 | <i>Cenchrus echinatus</i> L.                                                                                                                                                                                                          | Southern sandbur grass, Mossman River grass                         |
| 43 | <i>Cenchrus longispinus</i> (Hack.) Fernald                                                                                                                                                                                           | Mat sandbur, Spiny bur grass                                        |
| 44 | <i>Centaurea stoebe</i> L. subsp. <i>micranthos</i> (Gugler) Hayek (= <i>Centaurea biebersteinii</i> auct., <i>C. maculosa</i> auct.)                                                                                                 | Spotted knapweed                                                    |
| 45 | <i>Centaurea diffusa</i> Lam.                                                                                                                                                                                                         | Diffuse knapweed                                                    |
| 46 | <i>Centaurea iberica</i> Trevir. ex Spreng.                                                                                                                                                                                           | Iberian star thistle                                                |
| 47 | <i>Centaurea sulphurea</i> Willd.                                                                                                                                                                                                     | Sicilian star thistle                                               |
| 48 | <i>Centaurea virgata</i> Lam. subsp. <i>squarrosa</i> (Boiss.) Gugler (= <i>C. squarrosa</i> Willd., <i>C. virgata</i> auct.)                                                                                                         | Squarrose knapweed                                                  |
| 49 | <i>Cereus hildmannianus</i> K.Schum. (= <i>C. peruvianus</i> auct. pl. [= <i>C. hildmannianus</i> subsp. <i>hildmannianus</i> ], <i>C. uruguayanus</i> C.Ritter ex R.Kiesling [= <i>C. hildmannianus</i> subsp. <i>uruguayanus</i> ]) | Queen-of-the-night, Peruvian apple, Hedge cactus, Spiny tree cactus |
| 50 | <i>Chorispora tenella</i> (Pall.) DC.                                                                                                                                                                                                 | Purple mustard                                                      |
| 51 | <i>Chrysopogon aciculatus</i> (Retz.) Trin. (= <i>Andropogon acicularis</i> Retz. ex Roem. & Schult., <i>A. aciculatus</i> Retz., <i>Rhaphis acicularis</i> (Retz. ex Roem. & Schult.) Desv., <i>R. aciculata</i> (Retz.) Honda)      | Pilipiliula                                                         |
| 52 | <i>Cirsium japonicum</i> Fisch. ex DC.                                                                                                                                                                                                | Japanese thistle                                                    |
| 53 | <i>Cirsium ochrocentrum</i> A.Gray                                                                                                                                                                                                    | Yellow-spine thistle                                                |
| 54 | <i>Cirsium undulatum</i> (Nutt.) Spreng.                                                                                                                                                                                              | Wavy-leaf thistle                                                   |
| 55 | <i>Clematis vitalba</i> L.                                                                                                                                                                                                            | Old man's beard                                                     |
| 56 | <i>Clidemia hirta</i> (L.) D.Don (= <i>Melastoma hirtum</i> L.)                                                                                                                                                                       | Koster's curse                                                      |
| 57 | <i>Coccinia grandis</i> (L.) Voigt (= <i>C. cordifolia</i> auct., <i>C. indica</i> Wight & Arn.                                                                                                                                       | Ivy gourd                                                           |
| 58 | <i>Cortaderia richardii</i> (Endl.) Zotov                                                                                                                                                                                             | New Zealand pampas grass                                            |
| 59 | <i>Crassula helmsii</i> (Kirk) Cockayne                                                                                                                                                                                               | Swamp stonecrop                                                     |
| 60 | <i>Crataegus sinaica</i> Boiss.                                                                                                                                                                                                       | Azzarola                                                            |
| 61 | <i>Crupina vulgaris</i> Cass.                                                                                                                                                                                                         | Common crupina, Bearded creeper                                     |
| 62 | <i>Cupaniopsis anacardioides</i> (A.Rich.) Radlk. (= <i>Cupania anacardioides</i> A.Rich.)                                                                                                                                            | Carrotwood                                                          |
| 63 | <i>Cuscuta indecora</i> Choisy (= <i>C. jepsonii</i> Yunck.)                                                                                                                                                                          | Large-seeded dodder                                                 |
| 64 | <i>Cuscuta reflexa</i> Roxb.                                                                                                                                                                                                          | Giant dodder, Indian dodder                                         |
| 65 | <i>Cymbopogon refractus</i> (R.Br.) A.Camus (= <i>Andropogon refractus</i> R.Br.)                                                                                                                                                     | Barbwire grass                                                      |
| 66 | <i>Datura leichhardtii</i> F.Muell. ex Benth. (= <i>D. pruinosa</i> Greenm.)                                                                                                                                                          | Leichhardt's thorn apple                                            |
| 67 | <i>Datura wrightii</i> Regel (= <i>D. meteloides</i> auct.)                                                                                                                                                                           | Hairy thorn apple                                                   |
| 68 | <i>Diplotaxis tenuifolia</i> (L.) DC. (= <i>Sisymbrium tenuifolium</i> L.)                                                                                                                                                            | Sand rocket                                                         |
| 69 | <i>Dipsacus fullonum</i> L. (= <i>D. sylvestris</i> Huds.)                                                                                                                                                                            | Wild teasel                                                         |
| 70 | <i>Dioscorea alata</i> L. (= <i>D. rubella</i> Roxb.)                                                                                                                                                                                 | White yam                                                           |
| 71 | <i>Drymaria arenarioides</i> Humb. & Bonpl. ex Schult.                                                                                                                                                                                | Alfombrilla, Lightningweed                                          |
| 72 | <i>Echium italicum</i> L.                                                                                                                                                                                                             | Italian bugloss                                                     |
| 73 | <i>Eichhornia azurea</i> (Sw.) Kunth                                                                                                                                                                                                  | Anchored water hyacinth                                             |
| 74 | <i>Elaeagnus X reflexa</i> C.Morren & Decne. (= <i>E. pungens</i> Thunb. var. <i>reflexa</i> (C. Morren & Decne.) C.K.Schneid.                                                                                                        | Elaeagnus                                                           |
| 75 | <i>Elephantopus mollis</i> Kunth (= <i>E. tomentosus</i> auct. nonn.)                                                                                                                                                                 | Elephantopus, Elephant's foot                                       |
| 76 | <i>Emex spinosa</i> (L.) Campd. (= <i>Rumex spinosus</i> L.)                                                                                                                                                                          | Spiny emex, Devil's thorn, Lesser jack                              |
| 77 | <i>Equisetum arvense</i> L.                                                                                                                                                                                                           | Field horsetail, Common horsetail                                   |
| 78 | <i>Erica lusitanica</i> Rudolphi                                                                                                                                                                                                      | Spanish heath, Portuguese heath                                     |
| 79 | <i>Euphorbia esula</i> L. (= <i>E. X pseudovirgata</i> (Schur) Soó, <i>E. tommasiniana</i> Bertol., <i>E. virgata</i> Waldst. & Kit.)                                                                                                 | Leafy spurge                                                        |
| 80 | <i>Euphorbia oblongata</i> Griseb.                                                                                                                                                                                                    | Oblong spurge                                                       |
| 81 | <i>Euphorbia terracina</i> L.                                                                                                                                                                                                         | Geraldton carnation                                                 |
| 82 | <i>Fallopia japonica</i> (Houtt.) Ronse Decr. ( <i>Polygonum cuspidatum</i> Siebold & Zucc., <i>Polygonum Reynoutria</i> Makino, <i>Reynoutria japonica</i> )                                                                         | Japanese knotweed                                                   |



|     |                                                                                                                                                                              |                                                   |
|-----|------------------------------------------------------------------------------------------------------------------------------------------------------------------------------|---------------------------------------------------|
|     | Houtt.)                                                                                                                                                                      |                                                   |
| 83  | <i>Fallopia X bohemica</i> (Chrtek. & Chrtková) J.P.Bailey                                                                                                                   | Japanese knotweed hybrid                          |
| 84  | <i>Galium tricornutum</i> Dandy (= <i>G. tricornis</i> Stokes pro parte)                                                                                                     | Three-horned bedstraw, Corn-cleavers              |
| 85  | <i>Gaura coccinea</i> Pursh (= <i>G. odorata</i> Sessé ex Lag.)                                                                                                              | Scarlet gaura                                     |
| 86  | <i>Gaura drummondii</i> (Spach) Torr. & A.Gray (= <i>G. odorata</i> auct.)                                                                                                   | Drummond's gaura                                  |
| 87  | <i>Gmelina asiatica</i> L.                                                                                                                                                   | Badhara bush                                      |
| 88  | <i>Gunnera tinctoria</i> (Molina) Mirb. (= <i>G. chilensis</i> Lam., <i>Panke tinctoria</i> Molina)                                                                          | Chilean rhubarb                                   |
| 89  | <i>Gymnocoronis spilanthoides</i> DC.                                                                                                                                        | Senegal tea plant, Temple plant                   |
| 90  | <i>Gypsophila paniculata</i> L.                                                                                                                                              | Baby's breath                                     |
| 91  | <i>Halimodendron halodendron</i> (Pall.) Voss (= <i>Caragana argentea</i> Lam., <i>Halimodendron argenteum</i> (Lam.) DC., <i>Robinia halodendron</i> Pall.)                 | Russian salt tree                                 |
| 92  | <i>Halogeton glomeratus</i> (M.Bieb.) C.A.Mey. (= <i>Anabasis glomerata</i> M.Bieb.)                                                                                         | Halogeton                                         |
| 93  | <i>Harungana madagascariensis</i> Lam. ex Poir. (= <i>Haronga madagascariensis</i> (Lam. ex Poir.) Choisy)                                                                   | Harungana, Haronga, Dragon's-blood-tree           |
| 94  | <i>Helianthus ciliaris</i> DC.                                                                                                                                               | Blueweed, Texas blueweed                          |
| 95  | <i>Hieracium aurantiacum</i> L. (= <i>Pilosella aurantiaca</i> (L.) F.W.Schultz & Sch. Bip.)                                                                                 | Orange hawkweed                                   |
| 96  | <i>Hieracium pilosella</i> L. (= <i>Pilosella officinarum</i> F.W. Schultz & Sch. Bip.)                                                                                      | Mouse-ear hawkweed                                |
| 97  | <i>Hieracium praealtum</i> Gochn.                                                                                                                                            | King devil                                        |
| 98  | <i>Hydrilla verticillata</i> (L.f.) Royle                                                                                                                                    | Hydrilla                                          |
| 99  | <i>Hydrocharis morsus-ranae</i> L.                                                                                                                                           | Frog's-bit                                        |
| 100 | <i>Hydrodictyon reticulatum</i> Lagerh.                                                                                                                                      | Water net                                         |
| 101 | <i>Hygrophila costata</i> Nees et al. (= <i>H. brasiliensis</i> (Spreng.) Lindau, <i>H. guianensis</i> Nees, <i>Ruellia brasiliensis</i> Spreng.)                            | Hygrophila                                        |
| 102 | <i>Hygrophila polysperma</i> (Roxb.) T.Anderson (= <i>Justicia polysperma</i> Roxb.)                                                                                         | Miramar weed, Hygrophila                          |
| 103 | <i>Hymenachne amplexicaulis</i> (Rudge) Nees                                                                                                                                 | Olive hymenachne, West Indian marsh grass         |
| 104 | <i>Hypericum androsaemum</i> L.                                                                                                                                              | Tutsan                                            |
| 105 | <i>Hypericum X inodorum</i> Mill. (= <i>H. elatum</i> Aiton)                                                                                                                 | Tall St John's wort, Tall tutsan                  |
| 106 | <i>Hypericum triquetrifolium</i> Turra (= <i>H. crispum</i> L.)                                                                                                              | Tangled hypericum                                 |
| 107 | <i>Hyptis capitata</i> Jacq.                                                                                                                                                 | Knobweed                                          |
| 108 | <i>Hyptis pectinata</i> (L.) Poit. (= <i>Nepeta pectinata</i> L.)                                                                                                            | Comb hyptis                                       |
| 109 | <i>Hyptis suaveolens</i> (L.) Poit. (= <i>Ballota suaveolens</i> L.)                                                                                                         | Wild spikenard, Hyptis                            |
| 110 | <i>Imperata brasiliensis</i> Trin.                                                                                                                                           | Brazilian satin-tail                              |
| 111 | <i>Imperata brevifolia</i> Vasey (= <i>Imperata hookeri</i> (Rupr. ex Andersson) Hack.)                                                                                      | Satin-tail                                        |
| 112 | <i>Ipomoea triloba</i> L.                                                                                                                                                    | Little-bell, Aiea morning-glory                   |
| 113 | <i>Iris douglasiana</i> Herb.                                                                                                                                                | Douglas iris                                      |
| 114 | <i>Iris missouriensis</i> Nutt.                                                                                                                                              | Western blue flag, Rocky Mountain iris            |
| 115 | <i>Ischaemum rugosum</i> Salisb.                                                                                                                                             | Murain-grass                                      |
| 116 | <i>Iva axillaris</i> Pursh                                                                                                                                                   | Poverty weed                                      |
| 117 | <i>Iva axillaris</i> Pursh subsp. <i>robustior</i>                                                                                                                           | Poverty weed                                      |
| 118 | <i>Juncus acutus</i> L. subsp. <i>acutus</i>                                                                                                                                 | Spiny rush                                        |
| 119 | <i>Lagascea mollis</i> Cav.                                                                                                                                                  | Acuate                                            |
| 120 | <i>Lepidium latifolium</i> L.                                                                                                                                                | Perennial pepperweed, Perennial peppergrass       |
| 121 | <i>Limnobium spongia</i> (Bosc) Steud. (= <i>Hydrocharis spongia</i> Bosc)                                                                                                   | American spongeplant                              |
| 122 | <i>Limnocharis flava</i> (L.) Buchenau (= <i>Alisma flavum</i> L., <i>Limnocharis emarginata</i> Bonpl.)                                                                     | Sawah flowering rush, Yellow burrhead             |
| 123 | <i>Limnophila indica</i> (L.) Druce (= <i>Hottonia indica</i> L.)                                                                                                            | Ambulia                                           |
| 124 | <i>Limnophila sessiliflora</i> (Vahl) Blume (= <i>Hottonia sessiliflora</i> Vahl)                                                                                            | Ambulia                                           |
| 125 | <i>Linaria dalmatica</i> (L.) Mill. (= <i>Antirrhinum dalmaticum</i> L., <i>Linaria genistifolia</i> subsp. <i>dalmatica</i> (L.) Maire & Petitm.)                           | Dalmatian toadflax, Broadleaf toadflax            |
| 126 | <i>Ludwigia peploides</i> (Kunth) P.H.Raven                                                                                                                                  | Primrose willow, Creeping water-primrose          |
| 127 | <i>Malachra alceifolia</i> Jacq.                                                                                                                                             | Malachra                                          |
| 128 | <i>Malvella leprosa</i> (Ortega) Krapov. (= <i>Sida hederacea</i> (Douglas ex Hook.) Torr. ex A.Gray, <i>Sida leprosa</i> var. <i>hederacea</i> (Douglas ex Hook.) K.Schum.) | Alkali mallow, Alkali sida                        |
| 129 | <i>Marsilea mutica</i> Mett.                                                                                                                                                 | Nardoo, Australian water-clover                   |
| 130 | <i>Martynia annua</i> L. (= <i>M. diandra</i> Gloxin)                                                                                                                        | Devil's claw                                      |
| 131 | <i>Medinilla venosa</i> (Blume) Blume (= <i>Melastoma venosum</i> Blume)                                                                                                     |                                                   |
| 132 | <i>Melastoma malabathricum</i> L. (= <i>Melastoma normale</i> D.Don)                                                                                                         | Indian-rhododendron                               |
| 133 | <i>Melastoma</i> spp.                                                                                                                                                        | Melastoma                                         |
| 134 | <i>Menyanthes trifoliata</i> L.                                                                                                                                              | Bog bean                                          |
| 135 | <i>Miconia</i> spp.                                                                                                                                                          | Miconia                                           |
| 136 | <i>Mikania cordata</i> (Burm.f.) B.L.Rob.                                                                                                                                    | Mile-a-minute                                     |
| 137 | <i>Mikania micrantha</i> Kunth                                                                                                                                               | Mile-a-minute, Climbing hempweed                  |
| 138 | <i>Mikania scandens</i> (L.) Willd. (= <i>Eupatorium scandens</i> L., <i>Willoughbya scandens</i> (L.) Kuntze)                                                               | Climbing hempweed                                 |
| 139 | <i>Mimosa diplotricha</i> C.Wright (= <i>M. invisa</i> Mart.)                                                                                                                | Giant sensitive-plant                             |
| 140 | <i>Miscanthus floridulus</i> (Labill.) Warb. ex K.Schum. & Lauterb. (= <i>M. japonicus</i> Andersson, <i>Saccharum floridulum</i> Labill.)                                   | Giant Chinese silver grass, Japanese silver grass |

|     |                                                                                                                                                                                                                                                                                                         |                                                                |
|-----|---------------------------------------------------------------------------------------------------------------------------------------------------------------------------------------------------------------------------------------------------------------------------------------------------------|----------------------------------------------------------------|
| 141 | <i>Monochoria hastata</i> (L.) Solms                                                                                                                                                                                                                                                                    | Arrow-leaf monochoria, Hastate-leaf-pondweed                   |
| 142 | <i>Monochoria vaginalis</i> (Burm.f.) C.Presl. ex Kunth (= <i>M. vaginalis</i> var. <i>pauciflora</i> Merr., <i>Pontederia vaginalis</i> Burm.f.)                                                                                                                                                       | Oval-leaf monochoria, Oval-leaf-pondweed, Pickerel-weed        |
| 143 | <i>Muhlenbergia schreberi</i> J.F.Gmel. (= <i>M. diffusa</i> Willd.)                                                                                                                                                                                                                                    | Nimblewill                                                     |
| 144 | <i>Myagrum perfoliatum</i> L.                                                                                                                                                                                                                                                                           | Muskweed                                                       |
| 145 | <i>Najas guadalupensis</i> (Spreng.) Magnus                                                                                                                                                                                                                                                             | Southern naiad                                                 |
| 146 | <i>Nassella charruana</i> (Arechav.) Barkworth (= <i>Stipa charruana</i> Arechav.)                                                                                                                                                                                                                      | Lobed needlegrass                                              |
| 147 | <i>Nassella hyalina</i> (Nees) Barkworth (= <i>Stipa hyalina</i> Nees)                                                                                                                                                                                                                                  | Cane needlegrass                                               |
| 148 | <i>Nassella leucotricha</i> (Trin. & Rupr.) R.W.Pohl (= <i>Stipa leucotricha</i> Trin. & Rupr.)                                                                                                                                                                                                         | Texas needlegrass                                              |
| 149 | <i>Nechamandra alternifolia</i> (Roxb.) Thwaites (= <i>Vallisneria alternifolia</i> Roxb.)                                                                                                                                                                                                              |                                                                |
| 150 | <i>Neyraudia reynaudiana</i> (Kunth) Keng ex Hitchc. (= <i>Arundo reynaudiana</i> Kunth)                                                                                                                                                                                                                | Burma reed                                                     |
| 151 | <i>Nuphar lutea</i> (L.) Sm. (= <i>N. minor</i> Dumort., <i>N. sericea</i> Láng, <i>N. spathulifera</i> Rchb., <i>N. tenella</i> Rchb., <i>Nymphaea lutea</i> L., <i>N. umbilicalis</i> Salisb., <i>Nymphozanthus luteus</i> (L.) Fernald, <i>N. sericeus</i> (Láng) Fernald, <i>N. vulgaris</i> Rich.) | Yellow water-lily                                              |
| 152 | <i>Nymphoides geminata</i> (R.Br.) Kuntze (= <i>Villarsia geminata</i> R.Br.)                                                                                                                                                                                                                           | Entire marshwort                                               |
| 153 | <i>Nymphoides peltata</i> (S.G.Gmel.) Kuntze (= <i>Limnanthemum peltatum</i> S.G.Gmel.)                                                                                                                                                                                                                 | Gringed waterlily, Yellow floating-heart                       |
| 154 | <i>Oenanthe pimpinelloides</i> L.                                                                                                                                                                                                                                                                       | Water dropwort, Corky-fruit water-dropwort                     |
| 155 | <i>Ononis alopecuroides</i> L.                                                                                                                                                                                                                                                                          | Foxtail restharrow                                             |
| 156 | <i>Onopordum acaulon</i> L.                                                                                                                                                                                                                                                                             | Stemless thistle                                               |
| 157 | <i>Onopordum illyricum</i> L.                                                                                                                                                                                                                                                                           | Illyrian thistle                                               |
| 158 | <i>Onopordum tauricum</i> Willd.                                                                                                                                                                                                                                                                        | Taurian thistle, Taurean thistle                               |
| 159 | <i>Orobanche cooperi</i> (A.Gray) A.Heller (= <i>O. ludoviciana</i> Nutt. var. <i>cooperi</i> (A.Gray) Beck)                                                                                                                                                                                            | Cooper's broomrape                                             |
| 160 | <i>Oryza rufipogon</i> Griff. (= <i>O. fatua</i> J. König ex Trin., nom. nud., <i>O. sativa</i> L. var. <i>fatua</i> Prain)                                                                                                                                                                             | Red rice, Perennial wild red rice                              |
| 161 | <i>Ottelia alismoides</i> (L.) Pers.                                                                                                                                                                                                                                                                    | Duck-lettuce, Water-plantain ottelia                           |
| 162 | <i>Oxyspora paniculata</i> (D.Don) DC. (= <i>Arthrostemma paniculatum</i> D.Don)                                                                                                                                                                                                                        |                                                                |
| 163 | <i>Paederia cruddasiana</i> Prain                                                                                                                                                                                                                                                                       | Sewer vine                                                     |
| 164 | <i>Paederia foetida</i> L. (= <i>P. magnifica</i> Noronha, nom. nud., <i>P. scandens</i> (Lour.) Merr., <i>P. tomentosa</i> Blume, <i>Gentiana scandens</i> Lour.)                                                                                                                                      | Skunk vine                                                     |
| 165 | <i>Panicum antidotale</i> Retz. (= <i>P. miliare</i> Lam., <i>P. proliferum</i> Lam.)                                                                                                                                                                                                                   | Blue panic grass                                               |
| 166 | <i>Parietaria judaica</i> L. (= <i>P. diffusa</i> Mert. & W.D.J. Koch)                                                                                                                                                                                                                                  | Wall pellitory                                                 |
| 167 | <i>Passiflora bicornis</i> Mill. (= <i>P. pulchella</i> Kunth)                                                                                                                                                                                                                                          | Wingleaf passionfruit                                          |
| 168 | <i>Pennisetum alopecuroides</i> (L.) Spreng. (= <i>Alopecurus hordeiformis</i> L., <i>Panicum alopecuroides</i> L., <i>Pennistenum compressum</i> R.Br., <i>P. hordeiforme</i> (Thunb.) Spreng., <i>P. japonicum</i> Trin. ex Spreng.)                                                                  | Chinese pennisetum, Swamp foxtail grass                        |
| 169 | <i>Pennisetum pedicellatum</i> Trin.                                                                                                                                                                                                                                                                    | Kyasuwa-grass                                                  |
| 170 | <i>Pennisetum polystachion</i> (L.) Schult.                                                                                                                                                                                                                                                             | Mission grass, Thin Napier grass                               |
| 171 | <i>Persicaria perfoliata</i> (L.) H.Gross (= <i>Polygonum perfoliatum</i> L.)                                                                                                                                                                                                                           | Devil's tail tearthumb, Mile-a-minute-vine, Mile-a-minute-weed |
| 172 | <i>Persicaria wallichii</i> Greuter & Burdet (= <i>P. polystachya</i> (Wall. ex Meisn.) H.Gross, <i>Polygonum polystachyum</i> Wall. ex Meisn., <i>Rubrivena polystachya</i> (Wall. ex Meisn.) M.Král)                                                                                                  | Himalayan knotweed                                             |
| 173 | <i>Physalis longifolia</i> Nutt. (= <i>P. subglabrata</i> Mack. & Bush, <i>P. virginiana</i> Mill. var. <i>sonorae</i> (Torr.) Waterf.)                                                                                                                                                                 | Long-leaf ground-cherry                                        |
| 174 | <i>Picnomon acarna</i> (L.) Cass.                                                                                                                                                                                                                                                                       | Soldier thistle                                                |
| 175 | <i>Piper aduncum</i> L. (= <i>P. angustifolium</i> Ruiz & Pav., <i>P. celtidifolium</i> Kunth, <i>P. elongatum</i> Vahl)                                                                                                                                                                                | Spiked pepper, Piper                                           |
| 176 | <i>Potamogeton perfoliatus</i> L.                                                                                                                                                                                                                                                                       | Clasped pondweed                                               |
| 177 | <i>Pontederia rotundifolia</i> L.f. (= <i>Reussia rotundifolia</i> (L.f.) A.Cast.)                                                                                                                                                                                                                      | Tropical pickerel-weed                                         |
| 178 | <i>Prosopis alpataco</i> Phil.                                                                                                                                                                                                                                                                          | Mesquite                                                       |
| 179 | <i>Prosopis argentina</i> Burkart                                                                                                                                                                                                                                                                       | Mesquite                                                       |
| 180 | <i>Prosopis bukartii</i> Muñoz                                                                                                                                                                                                                                                                          | Mesquite                                                       |
| 181 | <i>Prosopis caldenia</i> Burkart                                                                                                                                                                                                                                                                        | Mesquite                                                       |
| 182 | <i>Prosopis calingastana</i> Burkart                                                                                                                                                                                                                                                                    | Cusqui, Mesquite                                               |
| 183 | <i>Prosopis campestris</i> Griseb.                                                                                                                                                                                                                                                                      | Mesquite                                                       |
| 184 | <i>Prosopis castellanosi</i> Burkart                                                                                                                                                                                                                                                                    | Mesquite                                                       |
| 185 | <i>Prosopis denudans</i> Benth. (= <i>P. patagonica</i> Speg.)                                                                                                                                                                                                                                          | Mesquite                                                       |
| 186 | <i>Prosopis elata</i> (Burkart) Burkart (= <i>P. campestris</i> Griseb. var. <i>elata</i> Burkart)                                                                                                                                                                                                      | Mesquite                                                       |
| 187 | <i>Prosopis farcta</i> (Banks & Sol.) J.F.Macbr. (= <i>Mimosa farcta</i> Banks & Sol.), <i>M. stephaniana</i> M.Bieb., <i>P. stephaniana</i> (M.Bieb.) Kunth ex Spreng.)                                                                                                                                | Syrian mesquite                                                |
| 188 | <i>Prosopis ferox</i> Griseb.                                                                                                                                                                                                                                                                           | Mesquite                                                       |
| 189 | <i>Prosopis fiebrigii</i> Harms                                                                                                                                                                                                                                                                         | Mesquite                                                       |
| 190 | <i>Prosopis hassleri</i> Harms                                                                                                                                                                                                                                                                          | Mesquite                                                       |
| 191 | <i>Prosopis humilis</i> Gillies ex Hook. & Arn.                                                                                                                                                                                                                                                         | Mesquite                                                       |
| 192 | <i>Prosopis kuntzei</i> Harms                                                                                                                                                                                                                                                                           | Mesquite                                                       |
| 193 | <i>Prosopis palmeri</i> S.Watson                                                                                                                                                                                                                                                                        | Mesquite                                                       |

|     |                                                                                                                                                                                                                                                                                                                                                                                                           |                                                   |
|-----|-----------------------------------------------------------------------------------------------------------------------------------------------------------------------------------------------------------------------------------------------------------------------------------------------------------------------------------------------------------------------------------------------------------|---------------------------------------------------|
| 194 | <i>Prosopis reptans</i> Benth. (= <i>P. cinerascens</i> (A.Gray) Benth., <i>Strombocarpa cinerascens</i> A.Gray)                                                                                                                                                                                                                                                                                          | Mesquite                                          |
| 195 | <i>Prosopis rojasiana</i> Burkart                                                                                                                                                                                                                                                                                                                                                                         | Mesquite                                          |
| 196 | <i>Prosopis ruizlealii</i> Burkart                                                                                                                                                                                                                                                                                                                                                                        | Mesquite                                          |
| 197 | <i>Prosopis ruscifolia</i> Griseb.                                                                                                                                                                                                                                                                                                                                                                        | Mesquite                                          |
| 198 | <i>Prosopis sericantha</i> Gillies ex Hook. & Arn.                                                                                                                                                                                                                                                                                                                                                        | Mesquite                                          |
| 199 | <i>Prosopis strombulifera</i> (Lam.) Benth. (= <i>Acacia strombulifera</i> (Lam.) Willd., <i>Mimosa strombulifera</i> Lam.)                                                                                                                                                                                                                                                                               | Argentine screwbean, Creeping mesquite            |
| 200 | <i>Prosopis torquata</i> (Cav. ex Lag.) DC. (= <i>Acacia torquata</i> Cav. ex Lag.)                                                                                                                                                                                                                                                                                                                       | Mesquite                                          |
| 201 | <i>Pueraria phaseoloides</i> (Roxb.) Benth. (= <i>Dolichos phaseoloides</i> Roxb., <i>Neustanthus javanicus</i> Benth., <i>Pueraria javanica</i> (Benth.) Benth.)                                                                                                                                                                                                                                         | Tropical kudzu                                    |
| 202 | <i>Ranunculus acris</i> L. (= <i>R. friesianus</i> Jord.)                                                                                                                                                                                                                                                                                                                                                 | Giant buttercup                                   |
| 203 | <i>Ranunculus sceleratus</i> L.                                                                                                                                                                                                                                                                                                                                                                           | Celery-leaf buttercup                             |
| 204 | <i>Reseda phyteuma</i> L.                                                                                                                                                                                                                                                                                                                                                                                 | Rampion mignonette                                |
| 205 | <i>Rorippa austriaca</i> (Crantz) Besser (= <i>Nasturtium austriacum</i> Crantz)                                                                                                                                                                                                                                                                                                                          | Austrian field cress                              |
| 206 | <i>Rorippa sylvestris</i> (L.) Besser                                                                                                                                                                                                                                                                                                                                                                     | Creeping yellow field cress                       |
| 207 | <i>Rubus anglocandicans</i> A.Newton                                                                                                                                                                                                                                                                                                                                                                      | Blackberry                                        |
| 208 | <i>Rubus argutus</i> Link                                                                                                                                                                                                                                                                                                                                                                                 | Prickly Florida blackberry                        |
| 209 | <i>Rubus ellipticus</i> Sm. (= <i>R. ellipticus</i> var. <i>obcordatus</i> (Franch.) Focke, <i>R. flavus</i> Buch.-Ham. ex D.Don, <i>R. gowreepful</i> Roxb.)                                                                                                                                                                                                                                             | Yellow Himalayan raspberry                        |
| 210 | <i>Rubus moluccanus</i> L. (= <i>R. hillii</i> F.Muell.)                                                                                                                                                                                                                                                                                                                                                  | Wild blackberry, Wild raspberry                   |
| 211 | <i>Rubus sieboldii</i> Blume                                                                                                                                                                                                                                                                                                                                                                              | Molucca raspberry                                 |
| 212 | <i>Saccharum spontaneum</i> L. (= <i>S. arenicola</i> Ohwi, <i>S. biflorum</i> Forssk.)                                                                                                                                                                                                                                                                                                                   | Wild sugarcane                                    |
| 213 | <i>Sagittaria montevidensis</i> Cham. & Schldt. (= <i>Lophotocarpus spongiosus</i> (Engelm.) J.G.Sm., <i>S. calycina</i> Engelm.)                                                                                                                                                                                                                                                                         | Giant arrowhead                                   |
| 214 | <i>Sagittaria platyphylla</i> (Engelm.) J.G.Sm. (= <i>S. graminea</i> Michx. var. <i>platyphylla</i> Engelm.)                                                                                                                                                                                                                                                                                             | Sagittaria, Delta arrowhead                       |
| 215 | <i>Salsola collina</i> Pall.                                                                                                                                                                                                                                                                                                                                                                              | Spineless Russian thistle, Tumbleweed             |
| 216 | <i>Salsola paulsenii</i> Litv.                                                                                                                                                                                                                                                                                                                                                                            | Barbwire Russian thistle                          |
| 217 | <i>Salsola vermiculata</i> L.                                                                                                                                                                                                                                                                                                                                                                             | Wormleaf salsola, Wormleaf saltwort               |
| 218 | <i>Salvia aethiopsis</i> L.                                                                                                                                                                                                                                                                                                                                                                               | Mediterranean sage                                |
| 219 | <i>Salvia virgata</i> Jacq. (= <i>S. campestris</i> M.Bieb.)                                                                                                                                                                                                                                                                                                                                              | Meadow sage                                       |
| 220 | <i>Salvinia auriculata</i> Aubl. (= <i>S. rotundifolia</i> Willd.)                                                                                                                                                                                                                                                                                                                                        | Salvinia, giant salvinia                          |
| 221 | <i>Salvinia biloba</i> Raddi                                                                                                                                                                                                                                                                                                                                                                              | Giant salvinia                                    |
| 222 | <i>Salvinia herzogii</i> de la Sota                                                                                                                                                                                                                                                                                                                                                                       | Giant salvinia                                    |
| 223 | <i>Sclerolaena birchii</i> (F.Muell.) Domin (= <i>Anisacantha birchii</i> F.Muell.)                                                                                                                                                                                                                                                                                                                       | Galvanised burr                                   |
| 224 | <i>Scolymus hispanicus</i> L.                                                                                                                                                                                                                                                                                                                                                                             | Golden thistle                                    |
| 225 | <i>Scolymus maculatus</i> L.                                                                                                                                                                                                                                                                                                                                                                              | Spotted golden thistle                            |
| 226 | <i>Senecio jacobaea</i> L.                                                                                                                                                                                                                                                                                                                                                                                | Tansy ragwort, St james' ragwort                  |
| 227 | <i>Senecio squalidus</i> L.                                                                                                                                                                                                                                                                                                                                                                               | Oxford ragwort                                    |
| 228 | <i>Senna tora</i> (L.) Roxb. (= <i>Cassia tora</i> L.)                                                                                                                                                                                                                                                                                                                                                    | Java bean, Sicklepod senna                        |
| 229 | <i>Setaria faberi</i> R.A.W.Herrm.                                                                                                                                                                                                                                                                                                                                                                        | Chinese foxtail, Giant foxtail                    |
| 230 | <i>Setaria palmifolia</i> (J.König) Stapf (= <i>Panicum palmifolium</i> Willd. ex Poir., <i>Chaetochloa palmifolia</i> Hitchc. & Chase)                                                                                                                                                                                                                                                                   | Palm grass                                        |
| 231 | <i>Solanum carolinense</i> L.                                                                                                                                                                                                                                                                                                                                                                             | Horse nettle, Carolina horse nettle               |
| 232 | <i>Solanum dimidiatum</i> Raf. (= <i>S. torreyi</i> A.Gray)                                                                                                                                                                                                                                                                                                                                               | Torrey's nightshade                               |
| 233 | <i>Solanum lanceolatum</i> Cav.                                                                                                                                                                                                                                                                                                                                                                           | Lance-leaf nightshade                             |
| 234 | <i>Solanum marginatum</i> L.f.                                                                                                                                                                                                                                                                                                                                                                            | White-margined nightshade, White-edged nightshade |
| 235 | <i>Solanum robustum</i> H.L.Wendl. (= <i>S. alatum</i> Seem. & J. C. Schmidt)                                                                                                                                                                                                                                                                                                                             | Silver-leaf nightshade                            |
| 236 | <i>Solanum tampicense</i> Dunal                                                                                                                                                                                                                                                                                                                                                                           | Wetland nightshade                                |
| 237 | <i>Sonchus arvensis</i> L.                                                                                                                                                                                                                                                                                                                                                                                | Perennial sow thistle                             |
| 238 | <i>Sorghum hybrid</i> cv. <i>Silk</i>                                                                                                                                                                                                                                                                                                                                                                     | Silk forage sorghum                               |
| 239 | <i>Sorghum X alnum</i> Parodi (= <i>S. bicolor</i> (L.) Moench X <i>S. halepense</i> (L.) Pers.)                                                                                                                                                                                                                                                                                                          | Columbus grass                                    |
| 240 | <i>Sparganium erectum</i> L. (= <i>S. chlorocarpum</i> Rydb., <i>S. polyedrum</i> (Asch. & Graebn.) Juz., <i>S. ramosum</i> Huds.)                                                                                                                                                                                                                                                                        | Exotic bur-reed, Bur reed                         |
| 241 | <i>Spermacoce alata</i> Aubl. (= <i>Borreria alata</i> (Aubl.) DC.)                                                                                                                                                                                                                                                                                                                                       | Borreria, Buttonweed                              |
| 242 | <i>Sphaerophysa salsula</i> (Pall.) DC. (= <i>Colutea caspica</i> M.Bieb., <i>Phaca salsula</i> Pall., <i>Swainsona salsula</i> (Pall.) Taub.)                                                                                                                                                                                                                                                            | Austrian peaeweed                                 |
| 243 | <i>Sporobolus indicus</i> (L.) R.Br. var. <i>major</i> (Büse) Baaijens (= <i>Agrostis fertilis</i> Steud., <i>S. diandrus</i> (Retz) P.Beauv. var. <i>major</i> Büse, <i>S. elongatus</i> R.Br. var. <i>purpureo-suffusus</i> Ohwi, <i>S. fertilis</i> (Steud.) Clayton, <i>S. indicus</i> var. <i>fertilis</i> (Steud.) Jovet & Guédès, <i>S. indicus</i> var. <i>purpureo-suffusus</i> (Ohwi) T.Koyama) | Giant Parramatta grass                            |
| 244 | <i>Stratiotes aloides</i> L.                                                                                                                                                                                                                                                                                                                                                                              | Water-aloë, Soldier plant, Water-soldier          |
| 245 | <i>Symphytum asperum</i> Lepech. (= <i>S. asperimum</i> Sims)                                                                                                                                                                                                                                                                                                                                             | Prickly comfrey, Rough comfrey                    |
| 246 | <i>Taeniatherum caput-medusae</i> (L.) Nevski (= <i>Cuviera caput-medusae</i> (L.) Koeler var. <i>aspera</i> Simonk., <i>Elymus caput-medusae</i> L., <i>E. crinitus</i> Schreb., <i>Hordeum crinitum</i> (Schreb.) Desf., <i>T. asperum</i> (Simonk.) Nevski, <i>T. crinitum</i> (Schreb.) Nevski)                                                                                                       | Medusa-head, Medusa's-head                        |
| 247 | <i>Themeda quadrivalvis</i> (L.) Kuntze (= <i>Andropogon quadrivalvis</i> L., <i>Anthriscia ciliata</i> L.f., <i>Themeda ciliata</i> (L.f.) Hack.)                                                                                                                                                                                                                                                        | Grader grass, Habana grass                        |

|     |                                                                                                                                                       |                                         |
|-----|-------------------------------------------------------------------------------------------------------------------------------------------------------|-----------------------------------------|
| 248 | <i>Themeda villosa</i> (Poir.) A.Camus (= <i>Anthistiria villosa</i> Poir., <i>Themeda gigantea</i> (Cav.) Hack. subsp. <i>villosa</i> (Poir.) Hack.) | Lyon's grass                            |
| 249 | <i>Thunbergia annua</i> Hochst.                                                                                                                       | Thunbergia                              |
| 250 | <i>Thunbergia fragrans</i> Roxb. (= <i>T. volubilis</i> Pers., <i>Flemingia grandiflora</i> Roxb. ex Rottler)                                         | Fragrant thunbergia, White thunbergia   |
| 251 | <i>Tribulus cistoides</i> L. (= <i>T. terrestris</i> L. var. <i>cistoides</i> (L.) Oliv.)                                                             | Caltrop                                 |
| 252 | <i>Triumfetta semitriloba</i> Jacq.                                                                                                                   | Sacramento bur                          |
| 253 | <i>Tropaeolum speciosum</i> Poepp. & Endl.                                                                                                            | Chilean flame creeper, Flame nasturtium |
| 254 | <i>Vallisneria gigantea</i> Graebn.                                                                                                                   | Eelgrass                                |
| 255 | <i>Verbascum thapsus</i> L.                                                                                                                           | Mullein, Great mullein                  |
| 256 | <i>Viscum album</i> L.                                                                                                                                | European mistletoe                      |
| 257 | <i>Zizania latifolia</i> (Griseb.) Turcz. ex Stapf (= <i>Z. caduciflora</i> Hand.-Mazz., <i>Hydrophyrum latifolium</i> Griseb.)                       | Manchurian wild rice                    |
| 258 | <i>Zygophyllum fabago</i> L. (= <i>Z. fabago</i> L. var. <i>brachycarpum</i> Boiss.)                                                                  | Syrian bean-caper                       |

### 1.11 Microbes

| No                              | Species                                             | Common Name                   |
|---------------------------------|-----------------------------------------------------|-------------------------------|
| <b>Fungi</b>                    |                                                     |                               |
| 1                               | <i>Alternaria triticina</i>                         |                               |
| 2                               | <i>Clavibacter michiganensis</i>                    |                               |
| 3                               | <i>Corticium koleroga</i>                           | Thread blight                 |
| 4                               | <i>Corticium stevensii</i>                          | Thread blight                 |
| 5                               | <i>Erwinia amylovora</i>                            |                               |
| 6                               | <i>Fusarium oxysporum</i> f. sp. <i>albedines</i>   | Phoenix wilt                  |
| 7                               | <i>Guignardia bidwellii</i>                         |                               |
| 8                               | <i>Liberobacter asiaticum</i>                       |                               |
| 9                               | <i>Monilinia fructicola</i>                         |                               |
| 10                              | <i>Nectria galligena</i>                            |                               |
| 11                              | <i>Pantoea stewartii</i>                            |                               |
| 12                              | <i>Phakopsora euvitis</i>                           |                               |
| 13                              | <i>Phoma tracheiphila</i>                           |                               |
| 14                              | <i>Phymatotrichopsis omnivora</i>                   | Root rot fungus               |
| 15                              | <i>Phytophthora fragariae</i> var. <i>fragariae</i> | Red stele rot of strawberries |
| 16                              | <i>Phytophthora fragariae</i> var. <i>rubi</i>      | Red stele root rot of Rubus   |
| 17                              | <i>Phytophthora ramorum</i>                         | Sudden Oak death              |
| 18                              | <i>Phytophthora palmivora</i>                       | Phoenix palm disease          |
| 19                              | <i>Xanthomonas axonopodis</i> pv. <i>citri</i>      |                               |
| 20                              | <i>Xylella fastidiosa</i>                           |                               |
| <b>Viruses and phytoplasmas</b> |                                                     |                               |
| 1                               | Apple proliferation phytoplasma                     |                               |
| 2                               | Banana bunchy top nanavirus                         |                               |
| 3                               | Cadang cadang viroid                                |                               |
| 4                               | Cotton leaf curl bigeminivirus                      |                               |
| 5                               | Maize rough dwarf fijivirus                         |                               |
| 6                               | Tomato bushy stunt tombusvirus                      |                               |
| 7                               | Tomato ringspot nepovirus                           |                               |

## Appendix 2

### Species Listed as Permitted Alien Species

The list of species that are permitted for introduction into South Africa is based on species that have already been introduced into South Africa and have been adjudged not to be invasive. This list will be compiled over time, to facilitate the ease of introduction of species with an acceptably low risk of becoming invasive.

Permitted Species are those that have been found or ascertained to have a negligible or no risk of invasion as a species, and which are therefore allowed to be brought into the country without having to undergo a Species Risk Assessment. The authorities will retain the right to require new genotypes (e.g. cultivars, varieties, genotypes) to undergo a Species Risk Assessment.

The approval to import a species into the country without any permit conditions may result in the species being put onto the list of Permitted Species.

The status as a Permitted Species does not absolve an importer from the requirements of a Vector Risk Assessment.

It will be possible to appeal against the presence of a species in the Permitted Species list, at the cost of the person or group lodging the appeal. This cost may be waived should the appeal succeed.

The following species are listed as Permitted Species:

#### 2.1 Mammals

| No | Species                    | Common name - English |
|----|----------------------------|-----------------------|
| 1  | <i>Bubalus bubalis</i>     | Water buffalo         |
| 2  | <i>Bos taurus</i>          | Cattle                |
| 3  | <i>Bos indicus</i>         | Cattle                |
| 4  | <i>Camelus dromedarius</i> | Camels                |
| 5  | <i>Canis lupus</i>         | Wolves                |
| 6  | <i>Equus asinus</i>        | Donkey                |
| 7  | <i>Lama glama</i>          | Lama                  |
| 8  | <i>Ovis aries</i>          | Sheep                 |

**NB: The DoA's list of all legal imports of mammals for agricultural purposes, that are not listed as invasive, to be added here.**

#### 2.2 Birds

| No | Species                                        | Common name - English |
|----|------------------------------------------------|-----------------------|
| 1  | <i>Struthio camelus camelus / c. massaicus</i> | Ostrich               |

#### 2.3 Reptiles

| No | Species                             | Common Name           |
|----|-------------------------------------|-----------------------|
| 1  | <i>Acrantophis dumerili</i>         | Dumeril's boa         |
| 2  | <i>Acrantophis madagascariensis</i> | Ground boa            |
| 3  | <i>Acrochordus javanicus</i>        | Java wart snake       |
| 4  | <i>Agkistrodon bilineatus</i>       | Cantil                |
| 5  | <i>Ahaetulla prasina</i>            | Long nosed tree snake |
| 6  | <i>Anolis carolinensis</i>          | Green anole           |
| 7  | <i>Antaresia childreni</i>          | Childrens python      |
| 8  | <i>Antaresia maculosus</i>          | Large blotched python |
| 9  | <i>Apodora papuana</i>              | Papuan olive python   |
| 10 | <i>Aspidites melanocephalus</i>     | Black headed python   |
| 11 | <i>Aspidites ramsayi</i>            | Woma                  |

|    |                               |                                 |
|----|-------------------------------|---------------------------------|
| 12 | <i>Atheris chlorechis</i>     | West African bush viper         |
| 13 | <i>Atheris nitschei</i>       | Sedge viper                     |
| 14 | <i>Atheris squamigera</i>     | Green/Common bush viper         |
| 15 | <i>Basiliscus plumifrons</i>  | Plumed basilisk                 |
| 16 | <i>Bitis nasicornis</i>       | Rhinoceros viper                |
| 17 | <i>Boa constrictor</i>        | Boa constrictor                 |
| 18 | <i>Boiga blandingii</i>       | Blandings treesnake             |
| 19 | <i>Boiga dendrophila</i>      | Mangrove treesnake              |
| 20 | <i>Bothriechis lateralis</i>  | Yellow lined palmviper          |
| 21 | <i>Bothriechis marchi</i>     | Honduran palmviper              |
| 22 | <i>Bothriechis schlegelii</i> | Eyelash viper                   |
| 23 | <i>Bothrochilus boa</i>       | Bismarck ringed python          |
| 24 | <i>Bothrops alternatus</i>    | Urutu                           |
| 25 | <i>Bothrops atrox</i>         | Fer-de-lance                    |
| 26 | <i>Bothrops neuwiedi</i>      | Neuwieds pitviper               |
| 27 | <i>Boulengerina annulata</i>  | Water cobra                     |
| 28 | <i>Brachylophus fasciatus</i> | Banded iguana                   |
| 29 | <i>Bungarus fasciata</i>      | Banded krait                    |
| 30 | <i>Calabaria reinhardti</i>   | Calabars burrowing python       |
| 31 | <i>Caloselasma rhodostoma</i> | Malayan pitviper                |
| 32 | <i>Candoia aspera</i>         | Viper boa                       |
| 33 | <i>Candoia bibroni</i>        | Pacific tree boa                |
| 34 | <i>Candoia carinata</i>       | Solomon island boa              |
| 35 | <i>Cerastes vipera</i>        | Sahara sand viper               |
| 36 | <i>Chamaeleo jacksonii</i>    | Jacksons chameleon              |
| 37 | <i>Chamaeleo melleri</i>      | Mellers chameleon               |
| 38 | <i>Chondropython viridis</i>  | Green tree python               |
| 39 | <i>Chrysopelea ornate</i>     | Flying snake                    |
| 40 | <i>Chrysopelea paradisi</i>   | Paradise tree snake             |
| 41 | <i>Corallus carinus</i>       | Emerald tree boa                |
| 42 | <i>Corallus cookii</i>        | Cooks tree boa                  |
| 43 | <i>Corallus enhydris</i>      | Garden tree boa                 |
| 44 | <i>Corucia zebrata</i>        | Monkey tailed skink             |
| 45 | <i>Crotalus adamanteus</i>    | Eastern diamondback rattlesnake |
| 46 | <i>Crotalus basiliscus</i>    | Mexican rattlesnake             |
| 47 | <i>Crotalus cerastes</i>      | Sidewinder                      |
| 48 | <i>Crotalus durissus</i>      | Neotropical rattlesnake         |
| 49 | <i>Crotalus enyo</i>          | Californian rattlesnake         |
| 50 | <i>Crotalus lepidus</i>       | Rock rattlesnake                |
| 51 | <i>Crotalus ruber</i>         | Red diamondback rattlesnake     |
| 52 | <i>Crotalus vegrandis</i>     | Uracoan rattlesnake             |
| 53 | <i>Cyclura cornuta</i>        | Cuban iguana,                   |
| 54 | <i>Dasypeltis fasciata</i>    | Banded eggeater                 |
| 55 | <i>Deinagkistrodon acutus</i> | Chinese sharp nosed viper       |
| 56 | <i>Dendroaspis jamesoni</i>   | Jamesons mamba                  |
| 57 | <i>Dendroaspis viridis</i>    | West African green mamba        |
| 58 | <i>Egernia major</i>          | Land mullet                     |
| 59 | <i>Elaphe carinata</i>        | Stinking goddess                |
| 60 | <i>Elaphe climacophora</i>    | Japanese ratsnake               |
| 61 | <i>Elaphe mandarina</i>       | Mandarin ratsnake               |
| 62 | <i>Elaphe moellendorffi</i>   | Hundred flower snake            |
| 63 | <i>Elaphe porphyracea</i>     | Bamboo ratsnake                 |
| 64 | <i>Elaphe prasina</i>         | Green ratsnake                  |
| 65 | <i>Elaphe quadrivirgata</i>   | Japanese four lined ratsnake    |
| 66 | <i>Elaphe radiata</i>         | Radiated ratsnake               |
| 67 | <i>Elaphe schrenckii</i>      | Russian ratsnake                |
| 68 | <i>Elaphe taeniura</i>        | Striped tailed ratsnake         |

|     |                                  |                                |
|-----|----------------------------------|--------------------------------|
| 69  | <i>Elaphe vulpine</i>            | Fox snake                      |
| 70  | <i>Epicrates angulifer</i>       | Cuban boa                      |
| 71  | <i>Epicrates cenchria</i>        | Rainbow boa                    |
| 72  | <i>Epicrates striatus</i>        | Haiti boa                      |
| 73  | <i>Eristicophis macmahonii</i>   | Leaf nosed viper               |
| 74  | <i>Eunectes murinus</i>          | Green anaconda                 |
| 75  | <i>Eunectes notaeus</i>          | Yellow anaconda                |
| 76  | <i>Furcifer oustaleti</i>        | Oustelets chameleon            |
| 77  | <i>Furcifer pardalis</i>         | Panther chameleon              |
| 78  | <i>Gehyra oceanica</i>           | Giant island gecko             |
| 79  | <i>Gehyra vorax</i>              | Halmahera gecko                |
| 80  | <i>Gekko monarchus</i>           | Monarch gecko                  |
| 81  | <i>Gekko siamensis</i>           | Chinese gecko                  |
| 82  | <i>Gekko smithii</i>             | Smiths gecko                   |
| 83  | <i>Gekko vittatus</i>            | White lined gecko              |
| 84  | <i>Gonyosoma janseni</i>         | Jansens ratsnake               |
| 85  | <i>Gonyosoma oxycephalum</i>     | Red-tailed green racer         |
| 86  | <i>Heloderma horridum</i>        | Beaded lizard                  |
| 87  | <i>Heloderma suspectum</i>       | Gila monster                   |
| 88  | <i>Hemitheconyx caudicinctus</i> | Fat tailed gecko               |
| 89  | <i>Hydrosaurus weberi</i>        | Sailfin lizard                 |
| 90  | <i>Iguana delicatissima</i>      | Antilles iguana                |
| 91  | <i>Lachesis muta</i>             | Bushmaster                     |
| 92  | <i>Langaha nasuta</i>            | Leaf nosed snake               |
| 93  | <i>Laticauda colubrinae</i>      | Giant sea snake                |
| 94  | <i>Laticauda laticauda</i>       | Banded sea snake               |
| 95  | <i>Leiopython albertisii</i>     | White lipped python            |
| 96  | <i>Liasis fuscus</i>             | Water python                   |
| 97  | <i>Liasis mackloti</i>           | Freckled python                |
| 98  | <i>Morelia amethystina</i>       | Amethystine python             |
| 99  | <i>Morelia boeleni</i>           | Boelens/black python           |
| 100 | <i>Morelia bredli</i>            | Bredli python                  |
| 101 | <i>Naja atra</i>                 | Chinese spitting cobra         |
| 102 | <i>Naja kaouthia</i>             | Monocled cobra                 |
| 103 | <i>Naja naja</i>                 | Spectacled cobra               |
| 104 | <i>Naja oxiana</i>               | Central Asian cobra            |
| 105 | <i>Naja siamensis</i>            | Siamese cobra                  |
| 106 | <i>Naja sputatrix</i>            | Black and white spitting cobra |
| 107 | <i>Ophiophagus hannah</i>        | King cobra                     |
| 108 | <i>Paroedura bastardi</i>        | Madagascar ground gecko        |
| 109 | <i>Paroedura picta</i>           | Painted gecko                  |
| 110 | <i>Phelsuma comorensis</i>       | Comoro day gecko               |
| 111 | <i>Porthidium nummifer</i>       | Jumping viper                  |
| 112 | <i>Proatheris superciliaris</i>  | Lowland swamp viper            |
| 113 | <i>Ptyas korros</i>              | Brown ratsnake                 |
| 114 | <i>Python anchietae</i>          | Angolan dwarf python           |
| 115 | <i>Python breitensteini</i>      | Short tailed python            |
| 116 | <i>Python brongersmai</i>        | Borneo python                  |
| 117 | <i>Python curtus</i>             | Blood python                   |
| 118 | <i>Python molurus</i>            | Indian/Burmese python          |
| 119 | <i>Python regius</i>             | Royal python                   |
| 120 | <i>Python reticulatus</i>        | Reticulated python             |
| 121 | <i>Rhacodactylus auriculatus</i> | Gargoyle gecko                 |
| 122 | <i>Rhacodactylus ciliatus</i>    | Crested gecko                  |
| 123 | <i>Rhacodactylus leachianus</i>  | New Caledonian gecko           |
| 124 | <i>Sanzina madagascariensis</i>  | Madagascar tree boa            |
| 125 | <i>Sceloporus mala chiticus</i>  | Emerald swift                  |

|     |                                       |                             |
|-----|---------------------------------------|-----------------------------|
| 126 | <i>Spilotes pullatus</i>              | Chicken snake               |
| 127 | <i>Thamnophis radix</i>               | Plains garter snake         |
| 128 | <i>Thrasops jacksonii</i>             | Jackson tree snake          |
| 129 | <i>Tiliqua gerrardii</i>              | Pinktongue skink            |
| 130 | <i>Tiliqua gigas</i>                  | New Guinea bluetongue skink |
| 131 | <i>Tiliqua nigrolutea</i>             | Blotched bluetongue skink   |
| 132 | <i>Tiliqua occipitalis</i>            | Western bluetongue skink    |
| 133 | <i>Tiliqua scincoides</i>             | Eastern bluetongue skink    |
| 134 | <i>Trimeresurus albolabris</i>        | White lipped tree viper     |
| 135 | <i>Trimeresurus macrops</i>           | Green tree viper            |
| 136 | <i>Trimeresurus popeiorum</i>         | Popes tree viper            |
| 137 | <i>Trimeresurus purpureomaculatus</i> | Mangrove pitviper           |
| 138 | <i>Trimeresurus trigonocephalus</i>   | Sri Lankan tree viper       |
| 139 | <i>Tropidolaemus wagleri</i>          | Temple viper                |
| 140 | <i>Uroplatus fimbriatus</i>           | Common leaf tailed gecko    |
| 141 | <i>Uroplatus henkeli</i>              | Henkels leaf tailed gecko   |
| 142 | <i>Uroplatus phantasticus</i>         | Mossy tailed gecko          |
| 143 | <i>Varanus komodoensis</i>            | Komodo dragon               |
| 144 | <i>Varanus salvator</i>               | Indonesian water monitor    |

## 2.4 Amphibians

No species listed.

## 2.5 Fishes (Fresh-water)

Note: This is an existing permitted list that is still being vetted by specialists.

| No | Species                            | Common Name                   |
|----|------------------------------------|-------------------------------|
| 1  | <i>Abramites hypselonotus</i>      | Headstander                   |
| 2  | <i>Abramites microcephalus</i>     | Marble headstander            |
| 3  | <i>Acanthodoras cataphractus</i>   | Painted talking catfish       |
| 4  | <i>Acanthodoras spinosissimus</i>  | Talking/spiny catfish         |
| 5  | <i>Acanthodoras hancocki</i>       | Hancock's catfish             |
| 6  | <i>Acanthopthalmus javanicus</i>   | Japanese loach/Javenese loach |
| 7  | <i>Acanthopthalmus kuhli</i>       | Coolie/Leopard/Spined loach   |
| 8  | <i>Acanthopthalmus myersi</i>      | Slimy loach                   |
| 9  | <i>Acanthopthalmus semicinctus</i> | Half-banded loach             |
| 10 | <i>Acanthopthalmus shelfordi</i>   | Shelfords loach               |
| 11 | <i>Acanthopsis choirorhynchus</i>  | Longnose/horseface loach      |
| 12 | <i>Acanthicus adonis</i>           |                               |
| 13 | <i>Acuticurimath macrops</i>       | Hooked-nose characin          |
| 14 | <i>Adinia xenica</i>               | Diamond killfish              |
| 15 | <i>Aequidens aff dorsigerus</i>    | Greencheeked aequidens        |
| 16 | <i>Aequidens awani</i>             | Golden cichlid                |
| 17 | <i>Aequidens coeruleopunctatus</i> | Blue-point flag cichlid       |
| 18 | <i>Aequidens curviceps</i>         |                               |
| 19 | <i>Aequidens dorsigerus</i>        | Red breasted cichlid          |
| 20 | <i>Aequidens duopunctatus</i>      | Double spot aequidens         |
| 21 | <i>Aequidens hercules</i>          | Hercules cichlid              |
| 22 | <i>Aequidens itanyi</i>            | Dolphin cichlid               |
| 23 | <i>Aequidens latifrons</i>         | Blue acara                    |
| 24 | <i>Aequidens metae</i>             | Shunk acara                   |
| 25 | <i>Aequidens metae</i>             | Shunk acara                   |
| 26 | <i>Aequidens maroni</i>            | Keyhole cichlid               |
| 27 | <i>Aequidens pallidus</i>          | Pale cichlid                  |
| 28 | <i>Aequidens paraguayensis</i>     | Cold cheeked flag cichlid     |
| 29 | <i>Aequidens portalegrensis</i>    | Port/black acara              |
| 30 | <i>Aequidens pulcher</i>           | Blue acara                    |
| 31 | <i>Aequidens rivulatus</i>         | Green terror                  |
| 32 | <i>Aequidens sapayensis</i>        | Sapaya cichlid                |
| 33 | <i>Aequidens</i> sp "gold saum"    | Orange fringed terror         |
| 34 | <i>Aequidens syspilum</i>          | Somber flag cichlid           |
| 35 | <i>Aequidens tetramerus</i>        | Saddle/pishuna cichlid        |
| 36 | <i>Aequidens thayeri</i>           | Redbellied flag cichlid       |
| 37 | <i>Aequidens vittatus</i>          | Half banded flag cichlid      |



|     |                                             |                                      |
|-----|---------------------------------------------|--------------------------------------|
| 38  | <i>Agamyxis costatus</i>                    | White line doradid                   |
| 39  | <i>Agamyxis pectinifrons</i>                | White spotted doradid                |
| 40  | <i>Agmus lyriformis</i>                     | Flatnose catfish                     |
| 41  | <i>Aconeiosus caucanus</i>                  | Lumpy banjo catfish                  |
| 42  | <i>Aconeiosus madeirensis</i>               | Flathead catfish                     |
| 43  | <i>Aidaprora carteri</i>                    |                                      |
| 44  | <i>Alepidomus evermanni</i>                 | Cuban glass fish                     |
| 45  | <i>Alestes chaperi</i>                      | Chaper's characin                    |
| 46  | <i>Alestes longipinnis</i>                  | Long-finned characin                 |
| 47  | <i>Alestes nurse</i>                        | Nurse tetra                          |
| 48  | <i>Alestes taeniurus</i>                    | African/lined tetra                  |
| 49  | <i>Alestopetersius caudalis</i>             | Yellow congo characin                |
| 50  | <i>Alfaro cultratus</i>                     | Knife edged livebearer               |
| 51  | <i>Ambassis (Chanada) lala</i>              | Glassfish                            |
| 52  | <i>Amblydoras hancocki</i>                  | Talking catfish                      |
| 53  | <i>Anableps anableps</i>                    | Four eyes                            |
| 54  | <i>Ancistrus dolichocheilus</i>             | Bristle nose catfish                 |
| 55  | <i>Ancistrus hoplogenys</i>                 | Pearl sucker catfish                 |
| 56  | <i>Ancistrus lineolatus</i>                 | Bristle nose catfish                 |
| 57  | <i>Ancistrus multispinus</i>                | Bristle nose catfish                 |
| 58  | <i>Ancistrus</i> sp "brown blotch"          | Brown blotch bristlenose             |
| 59  | <i>Ancistrus temmincki</i>                  | Temminck's bristle nose catfish      |
| 60  | <i>Ancistrus triradiatus</i>                | Branched bristle nose catfish        |
| 61  | <i>Anoptichthys jordani</i>                 | Blind cave tetra                     |
| 62  | <i>Anostomus anostomus</i>                  | Striped headstander                  |
| 63  | <i>Anostomus fasciatus</i>                  | Six-barred anostomus                 |
| 64  | <i>Anostomus gracilis</i>                   | Four-spot anostomus                  |
| 65  | <i>Anostomus taeniata</i>                   | Lisa                                 |
| 66  | <i>Anostomus ternetzi</i>                   | Red-mojuth headstander               |
| 67  | <i>Anostomus trimaculatus</i>               | Three-spotted headstander            |
| 68  | <i>Anostomus varius</i>                     | Checkerboard anostomus               |
| 69  | <i>Apcreiodon pongoensis</i>                | Pongo-pongo                          |
| 70  | <i>Aphyocharax alburnus</i>                 | Golden crowned aphyocharax           |
| 71  | <i>Aphyocharax anisiti</i>                  | Bloodfin                             |
| 72  | <i>Aphyocharax axelrodi</i>                 | Travassos/calypto tetra              |
| 73  | <i>Aphyocharax dentatus</i>                 | Falso bloodfin                       |
| 74  | <i>Aphyocharax erythrus</i>                 | Flame tail tetra                     |
| 75  | <i>Aphyocharax rathburni</i>                | Rathburn's bloodfin                  |
| 76  | <i>Aphyocharax rubripinnis</i>              | Bloodfin tetra                       |
| 77  | <i>Aphyocharax</i> sp "bleher"              | Bleher's bloodfin                    |
| 78  | <i>Aphyosemion ahli</i>                     | Ahl's lyretail                       |
| 79  | <i>Aphyosemion arnoldi</i>                  | Arnold's lyretail                    |
| 80  | <i>Aphyosemion australe australe</i>        | Cape lopez/lyretail panchax          |
| 81  | <i>Aphyosemion bertholdi</i>                | Berthold's killie                    |
| 82  | <i>Aphyosemion bitaeniatum</i>              | Coppery killie                       |
| 83  | <i>Aphyosemion bivattatum bivattatum</i>    | Red lyretail/two striped aphyosemion |
| 84  | <i>Aphyosemion breuningi</i>                | Breuning's killie                    |
| 85  | <i>Aphyosemion bualanum</i>                 | African swamp killie                 |
| 86  | <i>Aphyosemion calabaricus</i>              | Calabar lyretail                     |
| 87  | <i>Aphyosemion calliurum ahli</i>           | Ahl's aphyosemion/blue calliurum     |
| 88  | <i>Aphyosemion calliurum calliurum</i>      | Red chinned aphyosemion              |
| 89  | <i>Aphyosemion cameronensi</i>              | Cameroon round tailed aphyosemion    |
| 90  | <i>Aphyosemion celiae</i>                   | Celia's aphyosemion                  |
| 91  | <i>Aphyosemion chaytori</i>                 | Chaytor's killie                     |
| 92  | <i>Aphyosemion christyi</i>                 | Christy's lyretail                   |
| 93  | <i>Aphyosemion cinnamomum</i>               | Cinnamon killie                      |
| 94  | <i>Aphyosemion cognatum</i>                 | Red spotted/speckled killie          |
| 95  | <i>Aphyosemion (diapteron) cyanostictum</i> | Blue spotted killifish               |
| 96  | <i>Aphyosemion exigum</i>                   | Exiguum killie                       |
| 97  | <i>Aphyosemion fallax</i>                   | Ghana killie                         |
| 98  | <i>Aphyosemion filamentosum</i>             | Plumed lyretail/togo lyretail        |
| 99  | <i>Aphyosemion gubunense</i>                | Yellowgreen killie                   |
| 100 | <i>Aphyosemion gardneri</i>                 | Steel blue aphyosemion               |
| 101 | <i>Aphyosemion geryi</i>                    | Gery's aphyosemion                   |
| 102 | <i>Aphyosemion guineense</i>                | Guinea aphyosemion/geuinean killie   |
| 103 | <i>Aphyosemion gulare caeruleum</i>         | Blue gularis                         |
| 104 | <i>Aphyosemion gulare gulare</i>            | Yellow gularis                       |
| 105 | <i>Aphyosemion kiyawense</i>                | Loennberg's killie                   |
| 106 | <i>Aphyosemion labarrei</i>                 | Labares aphyosemion                  |
| 107 | <i>Aphyosemion liberiense</i>               | Liberian killie                      |
| 108 | <i>Aphyosemion loennbergi</i>               | Loennber's aphyosemion               |
| 109 | <i>Aphyosemion marmoratum</i>               | Green spangled chocolate killie      |
| 110 | <i>Aphyosemion meinkerii</i>                | Meinken's aphyosemion                |
| 111 | <i>Aphyosemion multicolor</i>               | Many coloured lyretail               |
| 112 | <i>Aphyosemion nigerianum</i>               | Nigerian killie                      |

|     |                                                        |                                                           |
|-----|--------------------------------------------------------|-----------------------------------------------------------|
| 113 | <i>Aphyosemion occidentale</i>                         | Golden pheasant                                           |
| 114 | <i>Aphyosemion oeseri</i>                              | Emerald aphyosemion                                       |
| 115 | <i>Aphyosemion ogoense ottogartneri</i>                | Broken striped killie                                     |
| 116 | <i>Aphyosemion petersi</i>                             | Peter's round tailed aphyosemion/yellow-edged aphyosemion |
| 117 | <i>Aphyosemion puerzli</i>                             | Puerzli's killfish                                        |
| 118 | <i>Aphyosemion rectogoense</i>                         | Silver yellow killie                                      |
| 119 | <i>Aphyosemion riggenbachi</i>                         | Red spotted purple killie                                 |
| 120 | <i>Aphyosemion roloffi</i>                             | Rolff's round tailed aphyosemion                          |
| 121 | <i>Aphyosemion rubrilabiale</i>                        | Red lipped killie                                         |
| 122 | <i>Aphyosemion scheeli</i>                             | Scheel's killfish                                         |
| 123 | <i>Aphyosemion schiotzi</i>                            | Filamentous lyretail                                      |
| 124 | <i>Aphyosemion schoutedeni</i>                         | Schouteden's aphyosemion                                  |
| 125 | <i>Aphyosemion seymouri</i>                            | Seymour's killfish                                        |
| 126 | <i>Aphyosemion sjoestedi</i>                           | Golden pheasant/blue throat aphyosemion/blue gular ?      |
| 127 | <i>Aphyosemion splendopleure</i>                       | Splendid killie                                           |
| 128 | <i>Aphyosemion spurrelli</i>                           | Turquoise killie                                          |
| 129 | <i>Aphyosemion striatum</i>                            | Five lined killie                                         |
| 130 | <i>Aphyosemion toddi</i>                               | Bluethroat killie                                         |
| 131 | <i>Aphyosemion walkeri</i>                             | Walker's killfish                                         |
| 132 | <i>Apistogramma agassizi</i>                           | Agassis dwarf cichlid                                     |
| 133 | <i>Apistogramma ambloplitoides</i>                     | Peruvian dwarf cichlid                                    |
| 134 | <i>Apistogramma bitaeniaztum</i>                       | Two striped dwarf cichlid                                 |
| 135 | <i>Apistogramma borelli</i>                            | Borelli's dwarf cichlid/umbrella dwarf cichlid            |
| 136 | <i>Apistogramma cacatuoides</i>                        | Cockatoo dwarf cichlid                                    |
| 137 | <i>Apistogramma corumbae</i>                           | Corumba dwarf cichlid                                     |
| 138 | <i>Apistogramma eunotus</i>                            | B lue-cheek dwarf cichlid                                 |
| 139 | <i>Apistogramma gibbiceps</i>                          | Yellow-cheeked dwarf cichlid                              |
| 140 | <i>Apistogramma gossei</i>                             | Brilliant dwarf cichlid                                   |
| 141 | <i>Apistogramma hippolytae</i>                         | Empress dwarf cichlid                                     |
| 142 | <i>Apistogramma klausewitzi</i>                        | Klauswitz dwarf cichlid                                   |
| 143 | <i>Apistogramma kleyi</i>                              | Banded dwarf cichlid                                      |
| 144 | <i>Apistogramma luelingi</i>                           | Golden dwarf cichlid                                      |
| 145 | <i>Apistogramma macmasteri</i>                         | Red-tailed dwarf cichlid                                  |
| 146 | <i>Apistogramma marmoratus</i>                         |                                                           |
| 147 | <i>Apistogramma ocellatus</i>                          | See astronotus ocellatus                                  |
| 148 | <i>Apistogramma ornatipinis</i>                        |                                                           |
| 149 | <i>Apistogramma ortmanni</i>                           | Ortman's dwarf cichlid                                    |
| 150 | <i>Apistogramma pretense</i>                           | Yellow dwarf cichlid/amazon dwarf cichlid                 |
| 151 | <i>Apistogramma pleurotaenia</i>                       | Chequered dwarf cichlid                                   |
| 152 | <i>Apistogramma ramirezi = Microgeophagus ramirezi</i> | Ramirez's/butterfloy dwarf cichlid/ram                    |
| 153 | <i>Apistogramma reitzigi</i>                           | Yellow dwarf cichlid/reitzig's dwarf cichlid              |
| 154 | <i>Apistogramma steindachneri</i>                      | Steindachner's dwarf cichlid                              |
| 155 | <i>Apistogramma trifasciatum</i>                       | Blue apistogramma                                         |
| 156 | <i>Apistogramma wesei</i>                              | Wise's dwarf cichlid                                      |
| 157 | <i>Apistogramma wickleri</i>                           | Wickler's dwarf cichlid                                   |
| 158 | <i>Apistogrammoides pucallprensensis</i>               | Dwarf cichlid                                             |
| 159 | <i>Aplocheilichthys flavipinnis</i>                    | Yellow-finned lampeye                                     |
| 160 | <i>Aplocheilichthys loemensis</i>                      | Loeme lampeye                                             |
| 161 | <i>Aplocheilichthys macrophthalmus</i>                 | Lampeye/bigeye lampeye                                    |
| 162 | <i>Aplocheilus slocki</i>                              | Dwarf/green panchax                                       |
| 163 | <i>Aplocheilus dayi</i>                                | Ceylon killfish                                           |
| 164 | <i>Aplocheilus lineatus</i>                            | Panchax lineatus/striped panchax                          |
| 165 | <i>Aplocheilus normani</i>                             | Norman's panchax                                          |
| 166 | <i>Aplocheilus panchax</i>                             | Blue panchax                                              |
| 167 | <i>Aplocheilus siamensis</i>                           | Panchax                                                   |
| 168 | <i>Apteronotus albifrons</i>                           | Black gost/black nose knifefish                           |
| 169 | <i>Apteronotus leptorhynchus</i>                       | Long nosed black ghost                                    |
| 170 | <i>Aristochromis christus</i>                          | White top                                                 |
| 171 | <i>Arnoldichthys spilopterus</i>                       | Red-eye characin                                          |
| 172 | <i>Asiphonichthys condei</i>                           | Glassy tetra/transparent tetra                            |
| 173 | <i>Aspidoras fuscoguttatus</i>                         | Spotted aspidoras                                         |
| 174 | <i>Aspidoras lokoi</i>                                 | Spot-line aspidoras/catfish                               |
| 175 | <i>Aspidoras pauciradiatus</i>                         | Fin blotch aspidoras                                      |
| 176 | <i>Aspredo aspredo</i>                                 | Slender banjo catfish                                     |
| 177 | <i>Astronotus ocellatus</i>                            | Oscar/velvet cichlid/red oscar/peacock cichlid            |
| 178 | <i>Astyanax abramis</i>                                | Confusing astyanax                                        |
| 179 | <i>Astyanax bimaculatus</i>                            | Two-spot astyanax                                         |
| 180 | <i>Astyanax daquae</i>                                 | Plan-tailed astyanax                                      |
| 181 | <i>Astyanax fasciatus fasciatus</i>                    | Sanded astyanax/blind cave tetra/Mexican tetra            |
| 182 | <i>Astyanax kennedyi</i>                               | Kennedy's astyanax                                        |
| 183 | <i>Astyanax metae</i>                                  | Rio meta astyanax                                         |
| 184 | <i>Astyanax mexicanus = Anoptichthys jordani</i>       | Mexican tetra (blind cave tetra)                          |
| 185 | <i>Astyanax mutator</i>                                | Mutato                                                    |

|      |                                                                       |                                  |
|------|-----------------------------------------------------------------------|----------------------------------|
| 186  | <i>Astyanax</i> sp "big scale"                                        | Big scale astyanax               |
| 187  | <i>Astyanax zonatus</i>                                               | False kennedy tetra              |
| 188  | <i>Ataeniobius taweri</i>                                             | Blue0-tailed gocolateid ?        |
| 189  | <i>Auchenipterichthys thoracatus</i>                                  | Zamora woodcat                   |
| 190  | <i>Auchenipterus demerare</i>                                         | Demerara woodcat                 |
| 191  | <i>Auchitoglanis</i> spp                                              |                                  |
| 192  | <i>Aulonocara nyasse</i>                                              | African peacock cichlid          |
| 193  | <i>Aulonocara nyasse</i> var                                          | Yellow peacock cichlid           |
| 194  | <i>Aulonocara</i> sp "night aulonocara"                               | Night aulonocara                 |
| 195  | <i>Aulonocara</i> sp "white edged"                                    | White edged aulonocara           |
| 196  | <i>Austrofundulus dolichopterus</i> = <i>Cynolebias dolichopterus</i> | Sickelfin killie/saberfin        |
| 197  | <i>Austrofundulus limnaeus</i>                                        | Schultz's spot finned killie     |
| 198  | <i>Austrofundulus meyersi</i>                                         | Meyer's killifish                |
| 199  | <i>Austrofundulus transilis</i>                                       | Venesuela killifish              |
| 200  | <i>Awaous grammepomus</i>                                             | Stripped river coby              |
| 201  | <i>Axelrodia lindeae</i>                                              | Blushing tetra                   |
| 202  | <i>Axelrodia riesei</i>                                               | Ruby tetra                       |
| 203  | <i>Axelrodia stigmatis</i>                                            | Whit star tetra                  |
| 204. | <i>Badis badis</i>                                                    | Badis/dwarf chameleon fish       |
| 205. | <i>Badis badis burmanicus</i>                                         | Burmese badis                    |
| 206. | <i>Bagrichthys hypselopterus</i>                                      | Black lancer catfish             |
| 207. | <i>Balantiocheilos melanopterus</i>                                   | Bala/tri-coloured/silver shark   |
| 208. | <i>Barbichthys hysclopterus</i>                                       | Black lancer catfish             |
| 209. | <i>Barbichthys laevis</i>                                             | Round/nose shark                 |
| 210. | <i>Barbodes acrislongae</i>                                           | Three-spotted barb               |
| 211. | <i>Barbodes arulius</i>                                               | Long-finned barb                 |
| 212. | <i>Barbodes binotatus</i>                                             | Spotted barb                     |
| 213. | <i>Barbodes callipterus</i>                                           | Clipper barb                     |
| 214. | <i>Barbodes chola</i>                                                 | Swamp barb                       |
| 215. | <i>Barbodes comptacanthus</i>                                         | African red-finned barb          |
| 216. | <i>Barbodes conchoni</i>                                              | Rosy/red barb                    |
| 217. | <i>Barbodes cumingi</i>                                               | Cuming's barb                    |
| 218. | <i>Barbodes daruphani</i>                                             | Pale barb                        |
| 219. | <i>Barbodes dorsimaculatus</i>                                        | Sumatra/black lined barb         |
| 220. | <i>Barbodes dunckeri</i>                                              | Duncker's/big spot barb          |
| 221. | <i>Barbodes everetti</i>                                              | Clown barb                       |
| 222. | <i>Barbodes fasciatus</i>                                             | Striped barb                     |
| 223. | <i>Barbodes filamentosus</i>                                          | Black-spot barb                  |
| 224. | <i>Barbodes gelius</i>                                                | Golden barb                      |
| 225. | <i>Barbodes guirali</i>                                               | Redfin barb                      |
| 226. | <i>Barbodes halei</i>                                                 | Hale's barb                      |
| 227. | <i>Barbodes hexazona</i>                                              | Belted barb/six-banded barb      |
| 228. | <i>Barbodes holotaenia</i>                                            | Spot-scale barb                  |
| 229. | <i>Barbodes kostorii</i>                                              | Koster's barb                    |
| 230. | <i>Barbodes lateristriga</i>                                          | Spanner barb /T-barb             |
| 231. | <i>Barbodes macrops</i>                                               | Slender black striped barb       |
| 232. | <i>Barbodes nicholsi</i>                                              | Redfin black striped barb        |
| 233. | <i>Barbodes nigrofasciatus</i>                                        | Black ruby/purple-headed barb    |
| 234. | <i>Barbodes oligolepis</i>                                            | Checkedred/island/tridecent barb |
| 235. | <i>Barbodes pentazona pentazona</i>                                   | Five banded barb                 |
| 236. | <i>Barbodes pentazona rhomboocellatis</i>                             | Ocellatged barg                  |
| 237. | <i>Barbodes pentazona rhomboocellata</i>                              | Round-banded barb                |
| 238. | <i>Barbodes phutunio</i>                                              | Dwarf/pigmy barb                 |
| 239. | <i>Barbodes prionocanthus</i>                                         | Greater black-striped barb       |
| 240. | <i>Barbodes roloffii</i>                                              | Roloff's barb                    |
| 241. | <i>Barbodes sachi</i>                                                 | Golden barb                      |
| 242. | <i>Barbodes schuberti</i>                                             | Schubert's barb                  |
| 243. | <i>Barbodes schwanenfeldi</i>                                         | Tin-foil barb                    |
| 244. | <i>Barbodes semifasciolatus</i>                                       | Chinese/green/half-stripe barb   |
| 245. | <i>Barbodes setivimensis</i>                                          | Algerian barb                    |
| 246. | <i>Barbodes stoliczhanus</i>                                          | Stolzicka's barb                 |
| 247. | <i>Barbodes terio</i>                                                 | One-spot barb                    |
| 248. | <i>Barbodes tetrazona tetrazona</i>                                   | Tiger/Sumatra barb               |
| 249. | <i>Barbodes ticto</i>                                                 | Tic tac toe/two-spot barb        |
| 250. | <i>Barbodes titteya</i>                                               | Cherry barb                      |
| 251. | <i>Barbodes trispilos</i>                                             | African three-spot barb          |
| 252. | <i>Barbodes usambarae</i>                                             | Peppered barb/algolan barb       |
| 253. | <i>Barbodes werneri</i>                                               | Werner's barb                    |
| 254. | <i>Bario steindachneri</i>                                            | Blotch-tailed barrio             |
| 255. | <i>Barombia</i> spp                                                   |                                  |
| 256. | <i>Bathethiops fanleri</i>                                            | African moonfish                 |
| 257. | <i>Bedotia geayi</i>                                                  | Madagascar rainbow fish          |
| 258. | <i>Belontia hasseltii</i>                                             | Combtail/java combtail           |
| 259. | <i>Belontia signata</i>                                               | Combtail paradise fish           |
| 260. | <i>Betta akarensis</i>                                                | Sarawak betta                    |

|      |                                                   |                                                   |
|------|---------------------------------------------------|---------------------------------------------------|
| 261. | <i>Betta bellica</i>                              | Slender/slim fighting fish                        |
| 262. | <i>Betta brederi</i>                              | Javan mouth-brooding fighting fish                |
| 263. | <i>Betta coccina</i>                              | Red fighting fish/claret betta                    |
| 264. | <i>Betta edithae</i>                              | Edith's betta                                     |
| 265. | <i>Betta faseila</i>                              | Striped fighting fish                             |
| 266. | <i>Betta imbellis</i>                             | Peaceful/crescent fighting fish                   |
| 267. | <i>Betta macrostoma</i>                           | Peacock fighting fish/Brunei beauty               |
| 268. | <i>Betta pictum</i>                               | Javan fighting fish                               |
| 269. | <i>Betta pugnax</i>                               | Penang mouth-brooding fighting fish ? (breeding)? |
| 270. | <i>Betta smaragdina</i>                           | Emerald betta/peaceful betta                      |
| 271. | <i>Betta splendens</i>                            | Libby's betta/split-tailed/Siamese fighting fish  |
| 272. | <i>Betta taeniata</i>                             | Striped fighting fish                             |
| 273. | <i>Betta unimaculata</i>                          | One-spot fighting fish                            |
| 274. | <i>Biotodoma cupido</i>                           | Cupid cichlid                                     |
| 275. | <i>Bivibranchia bimacula</i>                      | Two-spot sandsucker                               |
| 276. | <i>Bivibranchia protactila</i>                    | Silver sandsucker                                 |
| 277. | <i>Boehlkea fredcochui</i>                        | Cochu's blue tetra                                |
| 278. | <i>Boilius christy</i>                            | Copper nose                                       |
| 279. | <i>Boleophthalmus pectinirostris</i>              | Comb-toothed mudskipper                           |
| 280. | <i>Botia beaufortii</i>                           | Beauford's loach                                  |
| 281. | <i>Botia bredmorei</i>                            | Bredmore's loach                                  |
| 282. | <i>Botia dario</i>                                | Bengal loach                                      |
| 283. | <i>Botia horae</i>                                | Skunk/yellowtail loach/hora's loach               |
| 284. | <i>Botia hymenophysa</i>                          | Bande/tiger loach                                 |
| 285. | <i>Botia lohachata</i>                            | Pakistani loach                                   |
| 286. | <i>Botia lecontei</i>                             | Red-tail loach                                    |
| 287. | <i>Botia lucas-bahi</i>                           | Barred loach                                      |
| 288. | <i>Botia macracanthas</i>                         | Clown loach                                       |
| 289. | <i>Botia modesta</i>                              | Orange finned blue loach                          |
| 290. | <i>Botia morleti</i>                              | Hora's loach                                      |
| 291. | <i>Botia pulchripinnis</i>                        | Red finned blue loach                             |
| 292. | <i>Botia sidthimunki</i>                          | Dwarf loach                                       |
| 293. | <i>Botia striata</i>                              | Zebra loach                                       |
| 294. | <i>Brachydanio albolineatus</i>                   | Pearl/gold danio                                  |
| 295. | <i>Brachydanio frankei</i>                        | Leopard danio                                     |
| 296. | <i>Brachydanio kerri</i>                          | Kerrs danio                                       |
| 297. | <i>Brachydanio malabaricus</i>                    | Giant danio                                       |
| 298. | <i>Brachydanio nigrofasciatus</i>                 | Spotted danio                                     |
| 299. | <i>Brachydanio rerio</i>                          | Zebra/spotted danio                               |
| 300. | <i>Brachydanio rerio var</i>                      | Long finned zebra danio                           |
| 301. | <i>Brachydanio aggregatus</i>                     | Phillipine bumele bee fish                        |
| 302. | <i>Brachydanio doriae</i>                         | Doria's bumble bee fish                           |
| 303. | <i>Brachydanio dorile</i>                         | Wasp goby                                         |
| 304. | <i>Brachydanio Brachydanio nunus</i>              | Golden banded goby                                |
| 305. | <i>Brachydanio xanthozona</i>                     | Bumble bee fish                                   |
| 306. | <i>Brachyrhaphis episcopa</i>                     | Bishop                                            |
| 307. | <i>Brachyrhaphis dolminger</i>                    | Red-finned bishop                                 |
| 308. | <i>Brachyrhaphis terrabensis</i>                  | Upland live b earer                               |
| 309. | <i>Brachyrhaphis rhabdophora</i>                  | Regan's; bishop                                   |
| 310. | <i>Brienomyrus brachyistius</i>                   | Whale-faced marcusenius                           |
| 311. | <i>Brittanichthys axelrodi</i>                    | Blood-red tetra                                   |
| 312. | <i>Brochis britskii</i>                           | Giant brochis                                     |
| 313. | <i>Brochis coeruleus</i>                          | Short-bodied catfish                              |
| 314. | <i>Brochis multibradiatus</i>                     | Long-finned brochis/hob nosed brochis             |
| 315. | <i>Brochis splendens</i>                          | Short-bodied catfish                              |
| 316. | <i>Bryanis longipinnis = Brycinus spp</i>         | Long finned tetra                                 |
| 317. | <i>Bryanis nurse = Brycinus spp</i>               | Nurse tetra                                       |
| 318. | <i>Bryanis taeniurus = Brycinus spp</i>           | Lined tetra = syn. Brycinus spp                   |
| 319. | <i>Brycinus chaperi</i>                           | Chaper's characin                                 |
| 320. | <i>Brycinus longipinnis = Bryanis longipinnis</i> | Long-finned African tetra                         |
| 321. | <i>Brycinus nurse = Bryanis nurse</i>             | Nurse tetra                                       |
| 322. | <i>Brycinus taeniurus</i>                         | Lined African tetra                               |
| 323. | <i>Brycon breviceuda</i>                          | Short-tailed trout tetra                          |
| 324. | <i>Brycon cephalus</i>                            | Black-tailed brycon                               |
| 325. | <i>Brycon melanopterus</i>                        | Sickle-band brycon                                |
| 326. | <i>Bryconamericus loisae</i>                      | Pico peixe                                        |
| 327. | <i>Bryconops affinis</i>                          | Red-tipped tetra                                  |
| 328. | <i>Bryconops caudomaculatus</i>                   | Red cross tetra                                   |
| 329. | <i>Bryconops melanurus</i>                        | Jumping tetra-jumping anchovy                     |
| 330. | <i>Bunocephalus amaurus</i>                       | Banjo catfish                                     |
| 331. | <i>Bunocephalus coracoideus</i>                   | Two-coloured banjo catfish                        |
| 332. | <i>Bunocephalus spp</i>                           |                                                   |
| 333. | <i>Bunocephalus knerii</i>                        | Kner's banjo catfish                              |
| 334. | <i>Caenotropus maculosus</i>                      | Slender headsgtander                              |
| 335. | <i>Calamoichthys calabricus</i>                   | Rope/snake fish                                   |

|      |                                                        |                                       |
|------|--------------------------------------------------------|---------------------------------------|
| 336. | <i>Callichthys calabricus</i>                          | Armoured catfish                      |
| 337. | <i>Callichthys callichthys</i>                         | Slender armored catfish               |
| 338. | <i>Callophysus macropterus</i>                         | Callophysus                           |
| 339. | <i>Campylomormyrus cassaicus</i>                       | Angolan elephantnose                  |
| 340. | <i>Campylomormyrus rhynchophorus</i>                   | Down-poker                            |
| 341. | <i>Campylomormyrus tamandua</i>                        | Worm jawed mormyrid                   |
| 342. | <i>Capoeta arulius</i>                                 | Long-finned barb                      |
| 343. | <i>Capoeta chola</i>                                   | Swamp barb                            |
| 344. | <i>Capoeta conchonus</i>                               | Rosy barb                             |
| 345. | <i>Capoeta fasciatus = Capoeta melanampyx</i>          | Ember barb                            |
| 346. | <i>Capoeta hulstaerti</i>                              | Butterfly barb                        |
| 347. | <i>Capoeta melanampyx = Capoeta fasciatus</i>          | Ember barb                            |
| 348. | <i>Capoeta nigrofasciatus</i>                          | Nigger barb                           |
| 349. | <i>Capoeta oligolepis</i>                              | Chequered barb                        |
| 350. | <i>Capoeta partipentazona</i>                          | Banded barb                           |
| 351. | <i>Capoeta puckelli</i>                                | Two-spot African barb                 |
| 352. | <i>Capoeta semifasciolatus</i>                         | Semi barb/half-striped barb           |
| 353. | <i>Capoeta somphongs</i>                               | Somphong's barb                       |
| 354. | <i>Capoeta tetrazona</i>                               | Tiger bars                            |
| 355. | <i>Capoeta titteya</i>                                 | Cherry barb                           |
| 356. | <i>Carassius auratus auratus</i>                       | Gold fish (all varieties)             |
| 357. | <i>Cariotetraodon somphongsi</i>                       | Somphong's puffer fish                |
| 358. | <i>Carlastyanax aurocaudatus</i>                       | Gold-tailed tetra                     |
| 359. | <i>Carlhubbsia stuarti</i>                             | Banded widow                          |
| 360. | <i>Carnegiella marthae</i>                             | Black winged hatchet fish             |
| 361. | <i>Carnegiella meyersi</i>                             | Marbled hatchet fish                  |
| 362. | <i>Carnegiella strigiata fasciata</i>                  | Marbled banded hatchet fish           |
| 363. | <i>Carnegiella strigiata strigiata</i>                 | Marbled hatchet fish                  |
| 364. | <i>Carnegiella vesca</i>                               | Marbled hatchet fish                  |
| 365. | <i>Centromochlus heckeli</i>                           | Heckel's woodcat                      |
| 366. | <i>Chaenobryttus culosus</i>                           |                                       |
| 367. | <i>Chaetobranchius bitaeniatus</i>                     | Two-striped cichlid                   |
| 368. | <i>Chaetobranchius flavescens</i>                      | Red-eye cichlid                       |
| 369. | <i>Chalceus erythrurus</i>                             | Yellow-finned chalceus                |
| 370. | <i>Chalceus macrolepidotus</i>                         | Pink-tailed characin                  |
| 371. | <i>Chalinochromis brichardi</i>                        | Brichard's chalinochromis             |
| 372. | <i>Chanda asiatica</i>                                 |                                       |
| 373. | <i>Chanda baculis</i>                                  | Malaysian veiltailed glass fish       |
| 374. | <i>Chanda buruensis</i>                                | Siamese/east Indian glass fish        |
| 375. | <i>Chanda lala</i>                                     | Glass fish                            |
| 376. | <i>Chanda nama</i>                                     | Elongated glass fish                  |
| 377. | <i>Chanda ranga</i>                                    | Indian glass fish/glass perch         |
| 378. | <i>Chanda saculis</i>                                  | Glass fish                            |
| 379. | <i>Characidium fasciatum</i>                           | Banded characidium                    |
| 380. | <i>Characidium</i> sp "Gery"                           | "Gery's" characidium                  |
| 381. | <i>Cheirodon axelrodi</i>                              | Cardinal tetra                        |
| 382. | <i>Cheirodon kreigi</i>                                | Three-spot tetra                      |
| 383. | <i>Chilatherina axelrodi</i>                           | Axelrod's rainbowfish                 |
| 384. | <i>Chilatherina campsi</i>                             | Highlands rainbowfish                 |
| 385. | <i>Chilatherina crassispinosa</i>                      | Silver rainbowfish                    |
| 386. | <i>Chilatherina fasciata</i>                           | Barred rainbowfish                    |
| 387. | <i>Chilodus punctatus</i>                              | Spotted/pearl headstander             |
| 388. | <i>Chilodus</i> sp "Black band"                        | Balack banded headstander             |
| 389. | <i>Chilogobio czerskii</i>                             | Rainbow gudgeon                       |
| 390. | <i>Chilotilapia rhoades</i>                            | Rhoades chilo                         |
| 391. | <i>Chilotilapia</i> spp                                |                                       |
| 392. | <i>Chiopeops goodie</i>                                | Blue-fin top                          |
| 393. | <i>Cichlasoma altifrons</i>                            | Hi-head cichlid                       |
| 394. | <i>Cichlasoma atromaculatum</i>                        | Three-spot cichlid                    |
| 395. | <i>Cichlasoma aureum</i>                               | Golden cichlid                        |
| 396. | <i>Cichlasoma axelrodi</i>                             | Black chuco                           |
| 397. | <i>Cichlasoma bartoni</i>                              | Barton's cichlasoma                   |
| 398. | <i>Cichlasoma bifasciatum</i>                          | Red spotted cichlid/usmacinta cichlid |
| 399. | <i>Cichlasoma bimaculatum</i>                          | Two-spot cichlid                      |
| 400. | <i>Cichlasoma biocellatum</i>                          | Jack Dempsey                          |
| 401. | <i>Cichlasoma carpintis</i>                            | Pearlscale cichlid                    |
| 402. | <i>Cichlasoma centrachus</i>                           | Flier cichlid                         |
| 403. | <i>Cichlasoma citrinellum</i>                          | Midas cichlid                         |
| 404. | <i>Cichlasoma coryphaenoides = Cichlasoma carpinis</i> | Chocolate cichlid                     |
| 405. | <i>Cichlasoma crassa</i>                               | Flame cichlid                         |
| 406. | <i>Cichlasoma cutteri</i>                              | Cutter's cichlid                      |
| 407. | <i>Cichlasoma dovii</i>                                | Dows cichlid                          |
| 408. | <i>Cichlasoma erythraem</i>                            | Red devil                             |
| 409. | <i>Cichlasoma facetum</i>                              | Chanchito/chameleon cichlid           |
| 410. | <i>Cichlasoma festae</i>                               | Festae cichlid                        |

|      |                                                       |                                                       |
|------|-------------------------------------------------------|-------------------------------------------------------|
| 411. | <i>Cichlasoma festivum</i>                            | Flag/banded cichlid                                   |
| 412. | <i>Cichlasoma grammodes</i>                           | Many-pointed cichlid                                  |
| 413. | <i>Cichlasoma guttulatum</i>                          | Gold-cheek cichlid                                    |
| 414. | <i>Cichlasoma hartwegi</i>                            | Hartweg's cichlid                                     |
| 415. | <i>Cichlasoma hellabruni</i>                          | Hellabrun's/chocolaty cichlid                         |
| 416. | <i>Cichlasoma intermedium</i>                         | Jordan's cichlid                                      |
| 417. | <i>Cichlasoma kraussi</i>                             | Sharphead cichlid                                     |
| 418. | <i>Cichlasoma labiatum</i>                            | Red devil                                             |
| 419. | <i>Cichlasoma longimanus</i>                          | Longfin cichlasoma                                    |
| 420. | <i>Cichlasoma macracanthus</i>                        | Highspine cichlid                                     |
| 421. | <i>Cichlasoma maculate</i>                            | Chessboard cichlid                                    |
| 422. | <i>Cichlasoma managuense</i>                          | Managuense                                            |
| 423. | <i>Cichlasoma meeki</i>                               | Firemouth cichlid                                     |
| 424. | <i>Cichlasoma minkleyi</i>                            | Minkley's cichlid                                     |
| 425. | <i>Cichlasoma nicaraguense</i>                        | Spilotum                                              |
| 426. | <i>Cichlasoma nigrofasciatum</i>                      | Convict/zebra cichlid                                 |
| 427. | <i>Cichlasoma psittacum</i>                           | Parrot cichlid                                        |
| 428. | <i>Cichlasoma robertsoni</i>                          | Robertson's cichlid                                   |
| 429. | <i>Cichlasoma sajica</i>                              | t-bar convict                                         |
| 430. | <i>Cichlasoma salvini</i>                             | Yellow belly/salvinis cichlid                         |
| 431. | <i>Cichlasoma septemfasciatum</i>                     | Cutter's cichlid                                      |
| 432. | <i>Cichlasoma severum</i>                             | Deacon/banded cichlid                                 |
| 433. | <i>Cichlasoma spectabile</i>                          |                                                       |
| 434. | <i>Cichlasoma spilurum</i>                            | Blue-eyed cichlid                                     |
| 435. | <i>Cichlasoma synspilum</i>                           | Red-headed cichlid                                    |
| 436. | <i>Cichlasoma temporale</i>                           | Flag/golden cichlid                                   |
| 437. | <i>Cichlasoma tetracanthum</i>                        | Cuban cichlid                                         |
| 438. | <i>Cichlasoma tuyrense</i>                            | Tuyre cichlid                                         |
| 439. | <i>Cichlasoma umbriferum</i>                          | Umbriferum                                            |
| 440. | <i>Cichlasoma zonatum</i>                             | Dappled cichlid                                       |
| 441. | <i>Citharinus citharus</i>                            | Lined citharinid                                      |
| 442. | <i>Cleithrochromis bowleyi</i>                        | Mae west cichlid                                      |
| 443. | <i>Cnesterodon decemmaculatus</i>                     | Ten spotted livebearer                                |
| 444. | <i>Cochiodon plecostomoides</i>                       | Spoonmouth sucker catfish                             |
| 445. | <i>Cochliodon hondae</i>                              | Hondae cochliodon                                     |
| 446. | <i>Coelurichthys microlepis</i>                       | Croaking tetra                                        |
| 447. | <i>Coelurichthys tenuis</i>                           | Tenuis tetra                                          |
| 448. | <i>Colisa chuna</i>                                   | Honeycomb gourami                                     |
| 449. | <i>Colisa fasciata</i>                                | Giant/striped/banded gourami                          |
| 450. | <i>Colisa labiosa</i>                                 | Thick lipped gourami                                  |
| 451. | <i>Colisa lalia</i>                                   | Dwarf gourami                                         |
| 452. | <i>Colomesus asellus</i>                              | Brazilian freshwater puffer                           |
| 453. | <i>Colomesus psittacus</i>                            | Parrot/South American puffer fish                     |
| 454. | <i>Copella arnoldi</i>                                | Splash tetra/spraying characin                        |
| 455. | <i>Copella callolepis</i>                             | False splashing tetra/spotted/beautiful scaled charac |
| 456. | <i>Copella eichenmanni</i>                            | Eigenmann's copella                                   |
| 457. | <i>Copella metae</i> . = <i>Copella nigrofasciata</i> | Brown-banded copella                                  |
| 458. | <i>Copella multispinis</i>                            |                                                       |
| 459. | <i>Copella nattereri</i>                              | Plain nattereri/spotted cobella                       |
| 460. | <i>Copella nigrofasciata</i> = <i>Copella metae</i>   | Brown-banded copella                                  |
| 461. | <i>Copella vilmae</i>                                 | Rainbow copella                                       |
| 462. | <i>Copeina cuttata</i>                                | Red-spotted characin                                  |
| 463. | <i>Corydoras acutus</i>                               | Black top catfish                                     |
| 464. | <i>Corydoras adolfoi</i>                              | Adolfo's cory                                         |
| 465. | <i>Corydoras aeneus</i>                               | Bronze catfish                                        |
| 466. | <i>Corydoras agassizi</i>                             | Agassizi's catfish                                    |
| 467. | <i>Corydoras aldino</i>                               | Albino catfish                                        |
| 468. | <i>Corydoras ambiacus</i>                             | Half-masked cory                                      |
| 469. | <i>Corydoras arcuatus</i>                             | Skunk/arched catfish                                  |
| 470. | <i>Corydoras armatus</i>                              |                                                       |
| 471. | <i>Corydoras atropersonatus</i>                       | Masked cory                                           |
| 472. | <i>Corydoras axelrodi</i>                             | Axelrod's cory                                        |
| 473. | <i>Corydoras barbatus</i>                             | Banded catfish                                        |
| 474. | <i>Corydoras bondi</i>                                | Bond's cory                                           |
| 475. | <i>Corydoras caquetae</i>                             |                                                       |
| 476. | <i>Corydoras caudimaculatus</i>                       | Tail-spot catfish                                     |
| 477. | <i>Corydoras cervinus</i>                             |                                                       |
| 478. | <i>Corydoras cochui</i>                               | Cochus catfish                                        |
| 479. | <i>Corydoras decker</i>                               |                                                       |
| 480. | <i>Corydoras delphax</i>                              | Delphax                                               |
| 481. | <i>Corydoras erhardtii</i>                            | Erhardt's cory                                        |
| 482. | <i>Corydoras elegans</i>                              | Elegant catfish                                       |
| 483. | <i>Corydoras eques</i>                                | Golden eared cory                                     |
| 484. | <i>Corydoras evelynae</i>                             | Evelyn's cory                                         |
| 485. | <i>Corydoras garbei</i>                               | Garbei                                                |

|      |                                        |                                      |
|------|----------------------------------------|--------------------------------------|
| 486. | <i>Corydoras gracilis</i>              | Pretty dwarf cory                    |
| 487. | <i>Corydoras griseus</i>               | Grey catfish                         |
| 488. | <i>Corydoras guapore</i>               | Guapore cory                         |
| 489. | <i>Corydoras habrosus</i>              | Rio Salinas cory                     |
| 490. | <i>Corydoras haraldschultzi</i>        | Herald schultz's cory                |
| 491. | <i>Corydoras hastatus</i>              | Dwarf/pigmy catfish                  |
| 492. | <i>Corydoras juli</i>                  | Leopard catfish                      |
| 493. | <i>Corydoras latus</i>                 | Iridescent cory                      |
| 494. | <i>Corydoras leopardus</i>             | Leopard catfish                      |
| 495. | <i>Corydoras leucomelas</i>            | Blackfin cory                        |
| 496. | <i>Corydoras loxozonus</i>             | Slant-bar cory                       |
| 497. | <i>Corydoras macropterus</i>           | Long-fin cory                        |
| 498. | <i>Corydoras melanistius</i>           | Black-spotted catfish                |
| 499. | <i>Corydoras melanotaenia</i>          | Blackband cory                       |
| 500. | <i>Corydoras melini</i>                | Striped catfish                      |
| 501. | <i>Corydoras metae</i>                 | Masked/bandit catfish                |
| 502. | <i>Corydoras microps</i>               | Light spot catfish                   |
| 503. | <i>Corydoras yersi</i>                 | Myer's catfish                       |
| 504. | <i>Corydoras multimaculatus</i>        | Soldier catfish                      |
| 505. | <i>Corydoras nanus</i>                 | Mini cory                            |
| 506. | <i>Corydoras napoensis</i>             | Napo cory                            |
| 507. | <i>Corydoras narcissus</i>             | Narcissus cory                       |
| 508. | <i>Corydoras nattereri</i>             | Blue catfish                         |
| 509. | <i>Corydoras ornatus</i>               | Ornate cory                          |
| 510. | <i>Corydoras orphnopterus</i>          | Spotfin cory                         |
| 511. | <i>Corydoras osteocarus</i>            | Pepper-spot cory                     |
| 512. | <i>Corydoras paleatus</i>              | Peppered catfish                     |
| 513. | <i>Corydoras panda</i>                 | Panda cory                           |
| 514. | <i>Corydoras pastazensis</i>           | Pastaza cory                         |
| 515. | <i>Corydoras polystictus</i>           | Mini spotted cory                    |
| 516. | <i>Corydoras pulcher</i>               | Dash-line cory                       |
| 517. | <i>Corydoras punctatus</i>             | Spotted catfish                      |
| 518. | <i>Corydoras pygmaeus</i>              | Pycmy catfish                        |
| 519. | <i>Corydoras rabauti</i>               | Dwarf/rabaut's catfish               |
| 520. | <i>Corydoras reticulatus</i>           | Network/reticulated catfish          |
| 521. | <i>Corydoras robinae</i>               | Robina's cory                        |
| 522. | <i>Corydoras sanchesii</i>             | Sachez's cory                        |
| 523. | <i>Corydoras schwartzi</i>             | Schwartz's catfish                   |
| 524. | <i>Corydoras semiaquilus</i>           | Sharp-nosed cory                     |
| 525. | <i>Corydoras septentrionalis</i>       | Southern green cory                  |
| 526. | <i>Corydoras simulatus</i>             | Copy catfish                         |
| 527. | <i>Corydoras spilurus</i>              |                                      |
| 528. | <i>Corydoras sterbai</i>               | Fat catfish                          |
| 529. | <i>Corydoras sychri</i>                | Sychri                               |
| 530. | <i>Corydoras treitlii</i>              | Longnose catfish                     |
| 531. | <i>Corydoras trilineatus</i>           | Three line cory                      |
| 532. | <i>Corydoras undulates</i>             | Wavy catfish                         |
| 533. | <i>Corydoras xinguensis</i>            | Rio xingu cory                       |
| 534. | <i>Corydoras zygatus</i>               | Zygnatus                             |
| 535. | <i>Corynopoma riisei</i>               | Longnose catfish/swordtail characain |
| 536. | <i>Craetochanes caudomaculatus</i>     | Tail-spot tetra                      |
| 537. | <i>Craetochanes inaequalis</i>         | Orange finend characin               |
| 538. | <i>Craterocephalus stercusmuscarum</i> | Fly-specked hardyhead                |
| 539. | <i>Creagrutus beni</i>                 | Gold striped characin                |
| 540. | <i>Creagrutus cochui</i>               | Fred cochu's tetra                   |
| 541. | <i>Crenicara adolfi</i>                | Adolfis cichlid                      |
| 542. | <i>Crenicara filamentosa</i>           | Checkerboard lyretail                |
| 543. | <i>Crenicara maculate</i>              | Checkerboard cichlid                 |
| 544. | <i>Crenicara punctulata</i>            | Hercules cichlid                     |
| 545. | <i>Crenuchus spiluris</i>              | Sailfin tetra/sailfin characin       |
| 546. | <i>Ctenobrycon spiluris</i>            | Silver tetra                         |
| 547. | <i>Ctenopoma acutirostre</i>           | Spotted/leopard climbing perch       |
| 548. | <i>Ctenopoma ansorgei</i>              | Ornate ctenopoma                     |
| 549. | <i>Ctenopoma congicum</i>              | Congo climbing perch                 |
| 550. | <i>Ctenopoma fasciolatum</i>           | Banded climbing perch                |
| 551. | <i>Ctenopoma kingsleyae</i>            | Tail-spot climbing perch             |
| 552. | <i>Ctenopoma maculate</i>              | Single spot ctenopom                 |
| 553. | <i>Ctenopoma nanum</i>                 | Dwarf climbing perch                 |
| 554. | <i>Ctenopoma nigropannosum</i>         | Two-spot climbing perch              |
| 555. | <i>Ctenopoma ocellatum</i>             | Eye-spot climbing perch              |
| 556. | <i>Ctenopoma oxyrhynchum</i>           | Marbled/sharp-nose climbing perch    |
| 557. | <i>Ctenopoma spp</i>                   |                                      |
| 558. | <i>Ctenops pumilis</i>                 | Pigmy gourami                        |
| 559. | <i>Ctenops schalleri</i>               | Three-striped gourami                |
| 560. | <i>Ctenops vittatus</i>                | Croaking gourami                     |

|      |                                                                       |                                          |
|------|-----------------------------------------------------------------------|------------------------------------------|
| 561. | <i>Cubanichthys cubensis</i>                                          | Cuban killie                             |
| 562. | <i>Curimata ciliate</i>                                               | Hairy curimata                           |
| 563. | <i>Curimata elegans</i>                                               | Spotted curimata                         |
| 564. | <i>Curimata isognatha</i>                                             | Chunkey curimata                         |
| 565. | <i>Curimata microcephala</i>                                          | Curimata                                 |
| 566. | <i>Curimata rhomboids</i>                                             | Silver curimata                          |
| 567. | <i>Curimata spillura</i>                                              | Diamond-spot curimata                    |
| 568. | <i>Curimata vittata</i>                                               | Banded curimata                          |
| 569. | <i>Curimatella alburna</i>                                            | Common curimata                          |
| 570. | <i>Curimatopsis evelynae</i>                                          | Evelyn axelrod's curimata                |
| 571. | <i>Curimatopsis macrolepis</i>                                        | Shiny scaled curimata                    |
| 572. | <i>Cyathochromis</i> spp                                              |                                          |
| 573. | <i>Cyclocheilichthys apogon</i>                                       | Indian river barb/skin-head barb         |
| 574. | <i>Cynolebias adolfi</i>                                              | Adolf's pearl fish                       |
| 575. | <i>Cynolebias alexandri</i>                                           | Alexander's pearl fish                   |
| 576. | <i>Cynolebias antenori</i>                                            | Red-finned pearl fish                    |
| 577. | <i>Cynolebias bellotti</i>                                            | Argentine pearl fish                     |
| 578. | <i>Cynolebias boitonei</i>                                            | Brazilian lyrefin                        |
| 579. | <i>Cynolebias brucei</i>                                              | Turner's gaucho                          |
| 580. | <i>Cynolebias dolichopterus</i> = <i>Austrofunculus dolichopterus</i> | Sicklefin killie                         |
| 581. | <i>Cynolebias melanotaenia</i>                                        | Fighting gaucho                          |
| 582. | <i>Cynolebias nigripinnis</i>                                         | Black-finned pearl fish                  |
| 583. | <i>Cynolebias porosus</i>                                             | Big-lip pearl fish                       |
| 584. | <i>Cynolebias wolterstorffi</i>                                       | Wolterstorff's pearl fish                |
| 585. | <i>Cynopoecilus ladigesi</i>                                          | Ladigesi gaucho                          |
| 586. | <i>Cynopoecilus melanothaenia</i>                                     | Fighting gaucho                          |
| 587. | <i>Cynotilapia afra</i>                                               | Dwarf zebra                              |
| 588. | <i>Cynotilapia axelrodi</i>                                           | Axelrod's Dogtooth cichlid               |
| 589. | <i>Cynotilapia frontosa</i>                                           | Frontosa                                 |
| 590. | <i>Cynotilapia</i> spp                                                |                                          |
| 591. | <i>Cynotilapia</i> spp                                                |                                          |
| 592. | <i>Cyprichromis brient</i>                                            | Slender cichlid                          |
| 593. | <i>Cyprichromis leptosoma</i>                                         | Slender cichlid                          |
| 594. | <i>Cyprinus carpio</i>                                                | Koi carp                                 |
| 595. | <i>Danio aequipinnatus</i>                                            | Giant danio                              |
| 596. | <i>Danio devario</i>                                                  | Bengal danio                             |
| 597. | <i>Danio malabaricus</i>                                              | Giant danio                              |
| 598. | <i>Dasylicaria filamentosa</i>                                        | Rineloricaria filamentosa                |
| 599. | <i>Dermogenys pusillus</i>                                            | Malayan halfbeak                         |
| 600. | <i>Dermogenys sumatrans</i>                                           |                                          |
| 601. | <i>Dianema longibarbis</i>                                            | Porthole catfish                         |
| 602. | <i>Dianema urostriata</i>                                             | Striped-tail catfish                     |
| 603. | <i>Dinopterchis</i> spp                                               |                                          |
| 604. | <i>Distichodus affinis</i>                                            | Silver/Red-finned distichodus            |
| 605. | <i>Distichodus decemmaculatus</i>                                     | Dwarf distichodus                        |
| 606. | <i>Distichodus fasciolatus</i>                                        | Shark-tailed distichodus                 |
| 607. | <i>Distichodus lusosso</i>                                            | Long-nose distichodus                    |
| 608. | <i>Distichodus noboli</i>                                             | Nobol                                    |
| 609. | <i>Distichodus sexfasciatus</i>                                       | Six-barred distichodus                   |
| 610. | <i>Distocyclus conirostris</i>                                        | Yellow knife fish                        |
| 611. | <i>Doras eigenmannii</i>                                              | Eicenmann's doradid                      |
| 612. | <i>Dorichthys retzi</i>                                               | Ragged-tail pipefish                     |
| 613. | <i>Dormitator latifrons</i>                                           | Western/broadhead sleeper goby           |
| 614. | <i>Dormitator maculatus</i>                                           | Spotted sleeper goby                     |
| 615. | <i>Duopalathinus barbatus</i>                                         | Swallowtail pimelodid                    |
| 616. | <i>Duopalatinus goeldii</i>                                           | Goeld's pimelodid                        |
| 617. | <i>Ectodus</i> spp                                                    |                                          |
| 618. | <i>Eigenmannia virescens</i>                                          | Green knifefish                          |
| 619. | <i>Eirmotus octozona</i>                                              | False barb                               |
| 620. | <i>Elachocharax junki</i>                                             | Junk's darter tetra                      |
| 621. | <i>Elachocharax pulcheer</i>                                          | Dwarf darter tetra                       |
| 622. | <i>Entomocorus benjamini</i>                                          | Benjamin woodcat                         |
| 623. | <i>Epalzeophycus kalopterus</i>                                       | Flying fox                               |
| 624. | <i>Epalzeorhynchus siamensis</i>                                      | Siarese flying fox                       |
| 625. | <i>Ephippicharax orbicularis</i>                                      | Salmon discus                            |
| 626. | <i>Epicyrtois microlepis</i>                                          | Glass characin                           |
| 627. | <i>Epiplatys annulatus</i>                                            | Clown killie/Rocket panchax              |
| 628. | <i>Epiplatys fasciatus</i>                                            | Two-striped panchax                      |
| 629. | <i>Epiplatys chaperi</i>                                              | Firemouth/Orange throated panchax        |
| 630. | <i>Epiplatys chevalieri</i>                                           | Chevalier's epiplatys                    |
| 631. | <i>Epiplatys dageti</i>                                               | Black-lipped panchax/Red-chinned panchax |
| 632. | <i>Epiplatys dageti monroviae</i>                                     | Arnold's killie                          |
| 633. | <i>Epiplatys dorsalis</i>                                             | Jewelled Epiplatys                       |
| 634. | <i>Epiplatys duboisi</i>                                              | Dubois Epiplatys                         |
| 635. | <i>Epiplatys esekans</i>                                              |                                          |



|      |                                                      |                                        |
|------|------------------------------------------------------|----------------------------------------|
| 636. | <i>Epiplatys fasciolatus</i>                         | Banded epiplatys/Striped panchax       |
| 637. | <i>Epiplatys grahami</i>                             | Graham's epiplatys                     |
| 638. | <i>Epiplatys huberi</i>                              | Green-bellied panchax                  |
| 639. | <i>Epiplatys longiventralis</i>                      | Banded panchax                         |
| 640. | <i>Epiplatys macrostigma</i>                         | Large spotted panchax                  |
| 641. | <i>Epiplatys nigromarginates</i>                     | Black-edge epiplatys                   |
| 642. | <i>Epiplatys njalensis</i>                           | Red-spotted panchax                    |
| 643. | <i>Epiplatys ornatus</i>                             | Emerald epiplatys                      |
| 644. | <i>Epiplatys senegalensis</i>                        | Senegal epiplatys                      |
| 645. | <i>Epiplatys sexfasciatus</i>                        | Six-barred epiplatys/Green panchax     |
| 646. | <i>Epiplatys sheljuzhkoii</i>                        | Sheljuzhkoii panchax                   |
| 647. | <i>Epiplatys singa</i>                               | One-bar panchax                        |
| 648. | <i>Epiplatys spilargyreus</i>                        | Green Panchax                          |
| 649. | <i>Erpetoichthys calabaricus</i>                     | Reed fish                              |
| 650. | <i>Esomus danrica</i>                                | Flying barb                            |
| 651. | <i>Esomus malayensis</i>                             | Malawi flying barb                     |
| 652. | <i>Esomus metallicus</i>                             | Silver flying barb                     |
| 653. | <i>Etroplus maculatus</i>                            | Orange chromide                        |
| 654. | <i>Eutropiellus debauwi</i>                          | Three-striped glass catfish            |
| 655. | <i>Eutropiellus</i> spp                              |                                        |
| 656. | <i>Exodon paradoxus</i>                              | Bucktooth characin                     |
| 657. | <i>Farlowella acus</i>                               | Twig catfish                           |
| 658. | <i>Farlowella amazonica</i>                          | Twig catfish                           |
| 659. | <i>Farlowella gracilis</i>                           | Twig catfish                           |
| 660. | <i>Gagata cenia</i>                                  |                                        |
| 661. | <i>Carmanella pulchra</i>                            | Yucatin pupfish                        |
| 662. | <i>Garra lamta</i>                                   |                                        |
| 663. | <i>Garra taeniata</i>                                | Stone lapping fish                     |
| 664. | <i>Gasteropelecus levis</i>                          | Giant silver hatchet fish              |
| 665. | <i>Gasteropelecus maculatus</i>                      | Spotted hatchet fish                   |
| 666. | <i>Gasteropelecus sternicla</i>                      | Silver hatchet fish                    |
| 667. | <i>Geophagus acuticeps</i>                           | Cutic                                  |
| 668. | <i>Geophagus balzanii</i>                            | Paraguay mouthbrooder                  |
| 669. | <i>Geophagus braziliensis</i>                        | Peal cichlid/Brazilian high hat        |
| 670. | <i>Geophagus daemon</i>                              | Slender Geophagus                      |
| 671. | <i>Geophagus hondae</i>                              | Redump geophagus                       |
| 672. | <i>Geophagus jurupari</i>                            | Eartheater/Demon Fish                  |
| 673. | <i>Geophagus rhabdotus</i>                           | Pearl striped geophagus                |
| 674. | <i>Geophagus steindachneri</i>                       | Redhump geophagus                      |
| 675. | <i>Geophagus surinamensis</i>                        | Surinam geophagus                      |
| 676. | <i>Geophagus thayeri</i>                             | Eartheater                             |
| 677. | <i>Gephyrocharax atrocaundatus</i>                   | Platinum tetra                         |
| 678. | <i>Gephyrocharax caucanus</i>                        | Arrowhead tetra                        |
| 679. | <i>Gephyrochromis lawsi</i>                          | Violet cichlid                         |
| 680. | <i>Gephyrochromis moorii</i>                         | Yellow-tailed violet cichlid           |
| 681. | <i>Gephyrochromis</i> spp                            |                                        |
| 682. | <i>Girardinus metallicus</i>                         | Giradimus                              |
| 683. | <i>Glanucauda ?nequalis</i>                          | Croaking tetra                         |
| 684. | <i>Glaridichthys falcatus</i>                        | Yellow belly                           |
| 685. | <i>Glossamia sandei</i>                              | Giant cardinalfish                     |
| 686. | <i>Glossamia trifasciata</i>                         | Three-banded cardinalfish              |
| 687. | <i>Glossamia wichmanni</i>                           | Wichmann's cardinalfish                |
| 688. | <i>Glossolepis incisus – melactaenia incisus</i>     | Red rainbowfish                        |
| 689. | <i>Glossolepis maculosus</i>                         | Spotted rainbowfish                    |
| 690. | <i>Glossolepis multisquamatus</i>                    | Sepik rainbowfish                      |
| 691. | <i>Glossolepis wanamensis</i>                        | Lake wanam rainbowfish                 |
| 692. | <i>Gnathobagrus depressus</i>                        | Golden flathead catfish                |
| 693. | <i>Gnathonemus moorii</i>                            |                                        |
| 694. | <i>Gnathonemus petersii</i>                          | Peter's elephant-nose fish             |
| 695. | <i>Gnathonemus shilthuis</i>                         | Elephant trunk fish                    |
| 696. | <i>Gnathonemus tamandua</i>                          | Worm-jawed mormyrid                    |
| 697. | <i>Gnathopogon chankaensis</i>                       | Amur minnow                            |
| 698. | <i>Gobiopterus chuno</i>                             | Glass goby                             |
| 699. | <i>Gobius jonklaasi = Sicyopterus jonklaasi</i>      | Mountain goby                          |
| 700. | <i>Gobius sadanundio = Stigmatogobius sadanundio</i> | The knight goby                        |
| 701. | <i>Gobius vaimosa</i>                                |                                        |
| 702. | <i>Gymnocorymbus ternetzi</i>                        | Black tetra/Black widow/Petticoat fish |
| 703. | <i>Gymnocorymbus thayeri</i>                         | Straight finned black tetra            |
| 704. | <i>Gymnorhamphichthys hypostomus</i>                 | Long-nosed knife fish                  |
| 705. | <i>Gymnorhamphichthys rondoni</i>                    | Mousetail knife fish                   |
| 706. | <i>Gymnotis anguillaris</i>                          | Slant-bar knife fish                   |
| 707. | <i>Gymnotis carapo</i>                               | Banded knife fish                      |
| 708. | <i>Gyrinocheilus ymonieri</i>                        | Algae eater                            |
| 709. | <i>Halophryne trispinosus</i>                        | Todfish/Freshwater lionfish            |
| 710. | <i>Hampala macrolepidota</i>                         | Sidebar barb                           |

|      |                                                    |                                   |
|------|----------------------------------------------------|-----------------------------------|
| 711. | <i>Haplochromis ahli</i>                           |                                   |
| 712. | <i>Haplochromis of fenestratus</i>                 | Fenestratus no. 2                 |
| 713. | <i>Haplochromis of labridens</i>                   | Black-striped greed hap           |
| 714. | <i>Haplochromis of taeniolatus</i>                 | Blue-faced dusky hap              |
| 715. | <i>Haplochromis compressiceps</i>                  | Malawian eye-biter                |
| 716. | <i>Haplochromis electra</i>                        | Deepwater mouthbrooder            |
| 717. | <i>Haplochromis euchilus</i>                       | Big lips                          |
| 718. | <i>Haplochromis fenestratus</i>                    | Fenestratus                       |
| 719. | <i>Haplochromis fuscoteniatus</i>                  | Fascotoeniatus                    |
| 720. | <i>Haplochromis horei</i>                          | Spotted haplochromis              |
| 721. | <i>Haplochromis kingsleyae</i>                     |                                   |
| 722. | <i>Haplochromis labrosus</i>                       | Labrosus                          |
| 723. | <i>Haplochromis linni</i>                          | Elephant-nose polystigma          |
| 724. | <i>Haplochromis livingstoni</i>                    | Livingstoni                       |
| 725. | <i>Haplochromis mloto</i>                          | Ivory-topped hap                  |
| 726. | <i>Haplochromis moori</i>                          | Blue moori/blue lumphead          |
| 727. | <i>Haplochromis polystigma</i>                     | Pollystigma                       |
| 728. | <i>Haplochromis rostratus</i>                      | Rostratus                         |
| 729. | <i>Haplochromis similis</i>                        | Red empress                       |
| 730. | <i>Haplochromis sp "electric blue"</i>             | Electric blue hap                 |
| 731. | <i>Haplochromis spilonotus</i>                     | Spilonotus                        |
| 732. | <i>Haplochromis strigatus</i>                      | Broken-striped hap                |
| 733. | <i>Haplochromis venustus</i>                       | Venustus                          |
| 734. | <i>Haplochromis virginalis</i>                     | Yellow-finned hap                 |
| 735. | <i>Haplochromis wingati</i>                        | Nigerian mouth brooder            |
| 736. | <i>Hara hara</i>                                   |                                   |
| 737. | <i>Hasemania marginata</i>                         | Silver tips                       |
| 738. | <i>Hasemania melania</i>                           | Copper characin                   |
| 739. | <i>Hasemania nana</i>                              | Silver-tipped tetra               |
| 740. | <i>Hassar notospilus</i>                           | Black-finned doradid              |
| 741. | <i>Helogenes marmoratus</i>                        | Marbled helogenes                 |
| 742. | <i>Helostoma rudolfi</i>                           | Kissing gourami                   |
| 743. | <i>Helostma temmincki</i>                          | Green kissing gourami             |
| 744. | <i>Hemiancistrus nicefordi</i>                     | Clown sucker catfish              |
| 745. | <i>Hemiancistrus vittatus</i>                      | Striped sucker catfish            |
| 746. | <i>Hemibrycon guppyi</i>                           | Guppy's characin                  |
| 747. | <i>Hemibrycon tridens</i>                          | Jumping anchovy                   |
| 748. | <i>Hemibrycon thomasi = Palmatochromis thomasi</i> | African butterfly cichlid         |
| 749. | <i>Hemigrammocypripis lini</i>                     | Garner tetra                      |
| 750. | <i>Hemigrammopetersius caudalis</i>                | Yellow-tailed congo tetra         |
| 751. | <i>Hemigrammopetersius intermedius</i>             | Short-finned congo tetra          |
| 752. | <i>Hemigrammus armstrongi</i>                      | Golden tetra                      |
| 753. | <i>Hemigrammus belottii</i>                        | Dash-Dot tetra                    |
| 754. | <i>Hemigrammus boesemani</i>                       | Boeseman's tetra                  |
| 755. | <i>Hemigrammus coeruleus</i>                       | Cerulean tetra                    |
| 756. | <i>Hemigrammus erythrozonus</i>                    | Glowlight tetra                   |
| 757. | <i>Hemigrammus gracilis</i>                        | Glowlight tetra                   |
| 758. | <i>Hemigrammus hyanuary</i>                        | January tetra                     |
| 759. | <i>Hemigrammus levis</i>                           | Golden neon                       |
| 760. | <i>Hemigrammus luellingi</i>                       | Luelling's tetra                  |
| 761. | <i>Hemigrammus marginatus</i>                      | Bassam tetra                      |
| 762. | <i>Hemigrammus mattei</i>                          | Slender head and tail light       |
| 763. | <i>Hemigrammus nanus</i>                           | Silver tip tetra                  |
| 764. | <i>Hemigrammus ocellifer</i>                       | Head-and-tail tetra               |
| 765. | <i>Hemigrammus proncki</i>                         | Pronck's tetra                    |
| 766. | <i>Hemigrammus pulcher</i>                         | Garnet/pretty tetra/black wedge   |
| 767. | <i>Hemigrammus rhodostomus</i>                     | Red/rummy-nose tetra – H. Bleheri |
| 768. | <i>Hemigrammus rodwayi</i>                         | Gold/Rodway's tetra               |
| 769. | <i>Hemigrammus schmardae</i>                       | Schmards tetra                    |
| 770. | <i>Hemigrammus ulreyi</i>                          | Ulrey's tetra                     |
| 771. | <i>Hemigrammus unilineatus</i>                     | One-lined/Featherfin tetra        |
| 772. | <i>Hemigrammus vorderwinkleri</i>                  | Vorderwinkler's tetra             |
| 773. | <i>Hemiodontichthys acipenserinus</i>              | Knobnose whiptail catfish         |
| 774. | <i>Hemiodopsis goeldii</i>                         | Goeld's hemiodus                  |
| 775. | <i>Hemiodopsis gracilis</i>                        | Slender hemiodus                  |
| 776. | <i>Hemiodopsis immacalatus</i>                     | Silver hemiodus                   |
| 777. | <i>Hemiodopsis microlepis</i>                      | Red-tailed hemiodus               |
| 778. | <i>Hemiodopsis paraguayae</i>                      | One-spor hemiodus                 |
| 779. | <i>Hemiodopsis quadrimaculatus</i>                 | Barred hemiodus                   |
| 780. | <i>Hemiodopsis semitaeniatus</i>                   | Half-lined hemiodus               |
| 781. | <i>Hemiodopsis sterni</i>                          | Sterns hemiodus                   |
| 782. | <i>Hemiodopsis unimaculatus</i>                    | Yellow-tailed hemiodus            |
| 783. | <i>Hemiodopsis chrysopunctatus</i>                 | Gold-spot halfbeak                |
| 784. | <i>Hemiodopsis pongonognathus</i>                  | Longfinned halfbeak               |
| 785. | <i>Hephaestus carbo</i>                            | Coal grunter                      |

|      |                                                         |                               |
|------|---------------------------------------------------------|-------------------------------|
| 786. | <i>Heterandia formosa</i>                               | Dwart mosquito fish           |
| 787. | <i>Heterophallus rachovi</i>                            | Rachow's livebearer           |
| 788. | <i>Hippichthys raphifer</i>                             | Belly-barred pipefish         |
| 789. | <i>Holobrycon pesu</i>                                  | Mourning tetra                |
| 790. | <i>Homoloptera orthogoniata</i>                         | Saddlespot loach              |
| 791. | <i>Homoloptera of zollingeri</i>                        | Zollinger's hillstream loach  |
| 792. | <i>Hoplerythrinus unitaeniatus</i>                      | Golden thahira                |
| 793. | <i>Hoplosternum littorale</i>                           | Cuscudo                       |
| 794. | <i>Hoplosternum pectorale</i>                           | Spotted hoplo                 |
| 795. | <i>Hoplosternum thoractum</i>                           | Port hoplo/hoplo cat/atipa    |
| 796. | <i>Horandandia atukorali</i>                            | Midget minnow/Green Carpet    |
| 797. | <i>Hypancistrus zebra</i>                               |                               |
| 798. | <i>Hyphessobrycon of bifasciatus</i>                    | Yellow tetra                  |
| 799. | <i>Hyphessobrycon agulha</i>                            | Flag tetra                    |
| 800. | <i>Hyphessobrycon bellottii</i>                         | Dash-dot tetra                |
| 801. | <i>Hyphessobrycon bentosi</i>                           | Rosy tetra                    |
| 802. | <i>Hyphessobrycon bifasciatus</i>                       | Yellow/Bronze tetra           |
| 803. | <i>Hyphessobrycon callistus serpae</i>                  | Serpae tetra                  |
| 804. | <i>Hyphessobrycon callistus minor</i>                   | Minor tetra                   |
| 805. | <i>Hyphessobrycon cardinalis</i>                        | Cardinal tetra                |
| 806. | <i>Hyphessobrycon copelandi</i>                         | Copeland's tetra              |
| 807. | <i>Hyphessobrycon eos</i>                               | Dawn tetra                    |
| 808. | <i>Hyphessobrycon erythrostigma</i>                     | Bleeding heart tetra          |
| 809. | <i>Hyphessobrycon erythrozones</i>                      | Glowlight tetra               |
| 810. | <i>Hyphessobrycon erythurus</i>                         | Red-tailed tetra              |
| 811. | <i>Hyphessobrycon flammeus</i>                          | Flame tetra/tetra von rio     |
| 812. | <i>Hyphessobrycon greimi</i>                            | Griem's tetra                 |
| 813. | <i>Hyphessobrycon haroldschultzi</i>                    | Harold schultz's tetra        |
| 814. | <i>Hyphessobrycon herbertaxelrodi</i>                   | Black neon tetra              |
| 815. | <i>Hyphessobrycon heterorhabdus</i>                     | Flag tetra                    |
| 816. | <i>Hyphessobrycon innesi</i>                            | Neon tetra                    |
| 817. | <i>Hyphessobrycon loretoensis</i>                       | Tetra loreto                  |
| 818. | <i>Hyphessobrycon luetheni</i>                          | Luthen's tetra                |
| 819. | <i>Hyphessobrycon maculicauda</i>                       | Tail spot tetra               |
| 820. | <i>Hyphessobrycon metae</i>                             | Purple tetra                  |
| 821. | <i>Hyphessobrycon minimus</i>                           | Dwarf tetra                   |
| 822. | <i>Hyphessobrycon nigrifrons</i>                        | Black crowned tetra           |
| 823. | <i>Hyphessobrycon ornatus</i>                           | Rosy tetra                    |
| 824. | <i>Hyphessobrycon ornatus</i>                           | Ornate tetra                  |
| 825. | <i>Hyphessobrycon peruvianus</i>                        | Loreto tetra                  |
| 826. | <i>Hyphessobrycon pulchripinnis</i>                     | Lemon tetra                   |
| 827. | <i>Hyphessobrycon reticulatis</i>                       | Netted tetra                  |
| 828. | <i>Hyphessobrycon sp</i>                                | Robert's tetra                |
| 829. | <i>Hyphessobrycon rubrostigma</i>                       | Bleeding heart/perez tetra    |
| 830. | <i>Hyphessobrycon saizi</i>                             | Saiz's tetra                  |
| 831. | <i>Hyphessobrycon scholzei</i>                          | Black-lined tetra             |
| 832. | <i>Hyphessobrycon serpae-haraldschultzi</i>             |                               |
| 833. | <i>Hyphessobrycon serpae-serpae</i>                     | Serpae tetra                  |
| 834. | <i>Hyphessobrycon simulans = Paracheirodon simulans</i> | False tetra                   |
| 835. | <i>Hyphessobrycon socolofi</i>                          | Lesser bleeding heart         |
| 836. | <i>Hyphessobrycon stegemanni</i>                        | Savanna tetra                 |
| 837. | <i>Hyphessobrycon takasei</i>                           | Coffee bean tetra             |
| 838. | <i>Hyphessobrycon vilmae</i>                            | Vilma's tetra                 |
| 839. | <i>Hypopmus artedi</i>                                  | Mottled/spotted knife fish    |
| 840. | <i>Hypopmus brevirostris</i>                            | Blunt-headed knife fish       |
| 841. | <i>Hypopmus brevirostris</i>                            | Blunt-headed knife fish       |
| 842. | <i>Hypoptopoma gulare</i>                               | Flatnose dwarf sucker catfish |
| 843. | <i>Hypostomus jaguribensis</i>                          | Rio jaguribe hypostomus       |
| 844. | <i>Hypostomus niceferoi</i>                             | Nicefero's hypostomus         |
| 845. | <i>Hypostomus plecostomus</i>                           | Plecostomus/Sucker catfish    |
| 846. | <i>Hypostomus punctatus</i>                             | Spotted hypostomus            |
| 847. | <i>Hypostomus sp "diagonal bar"</i>                     | Diagonal bar hypostomus       |
| 848. | <i>Hypostomus varimaculosus</i>                         | Variable spot hypostomus      |
| 849. | <i>Hypostomus watwata</i>                               | Watwata pleco                 |
| 850. | <i>Hypseleotris compressus</i>                          | Empire goby                   |
| 851. | <i>Hypseleotris cyrinoides</i>                          | Chameleon goby                |
| 852. | <i>Hypseleotris guentheri</i>                           | Chameleon sleeper             |
| 853. | <i>Hypseleotris klunzingeri</i>                         | Australian pink sleeper       |
| 854. | <i>Incuaneltes spilurus</i>                             | Slender tetra                 |
| 855. | <i>Iguanodectes tenius</i>                              | Splender barb                 |
| 856. | <i>Ilyodon sp "black band"</i>                          | Black-banded goodeid          |
| 857. | <i>Indostomus paradoxus</i>                             | Paradox fish                  |
| 858. | <i>Inpaichthys kerri</i>                                | Blue emperor cichlid          |
| 859. | <i>Iodotropheus spp</i>                                 |                               |
| 860. | <i>Iodotropheus sprengerae</i>                          | Rusty cichlid                 |

|      |                                                                         |                               |
|------|-------------------------------------------------------------------------|-------------------------------|
| 861. | <i>Iriaterhrina wernerii</i>                                            | Featherfin/new guinea rainbow |
| 862. | <i>Julidochromis dickfeldii</i>                                         | Dickfeldii                    |
| 863. | <i>Julidochromis marlieri</i>                                           | Marlier's julie               |
| 864. | <i>Julidochromis ornatus</i>                                            | Julie                         |
| 865. | <i>Julidochromis regani</i>                                             | Convict julie                 |
| 866. | <i>Julidochromis</i> spp                                                |                               |
| 867. | <i>Julidochromis transcriptus</i>                                       | Masked julie                  |
| 868. | <i>Knodus breviceps</i>                                                 | Soap eater                    |
| 869. | <i>Kryptopterus bicirrhis</i>                                           | Glass catfish                 |
| 870. | <i>Kryptopterus macrocephalus</i>                                       | Poorman's glass catfish       |
| 871. | <i>Labeo albino</i>                                                     | Albino shark                  |
| 872. | <i>Labeo bala-melanopterus</i>                                          | Bala/silver shark             |
| 873. | <i>Labeo bicolor</i>                                                    | Red-tailed black shark        |
| 874. | <i>Labeo erythurus</i>                                                  | Red-fin shark                 |
| 875. | <i>Labeo frenatus</i>                                                   | Rainbow shark                 |
| 876. | <i>Labeo rohita</i>                                                     | Rohita                        |
| 877. | <i>Labeochromis caeruleus</i> = <i>Labidochromis caeruleus</i>          | Sky- blue labiolo             |
| 878. | <i>Labeochromis vellicans</i> = <i>Labidochromis vellicans</i>          | Vellicans                     |
| 879. | <i>Labeotropheus fueelleborni</i>                                       | Fuelleborni cichlid           |
| 880. | <i>Labeotropheus</i> spp                                                |                               |
| 881. | <i>Labeotropheus travawasae</i> = <i>Labidochromis travawasae</i>       | Red-top travawasae            |
| 882. | <i>Labidochromis exasperatus</i> = <i>Melanochromis exasperatus</i>     | Orange-lined cichlid          |
| 883. | <i>Labidochromis joanjohnsonae</i> = <i>Melanochromis joanjohnsonae</i> | Banner cichlid                |
| 884. | <i>Labidochromis</i> spp                                                |                               |
| 885. | <i>Labidochromis textilis</i>                                           | Cloth-of-gold cichlid         |
| 886. | <i>Labiobarsus burmanicus</i>                                           | Long-finned shark             |
| 887. | <i>Labiobarsus festivus</i>                                             | Signal barb                   |
| 888. | <i>Ladigesia roloffi</i>                                                | Jely-bean tetra               |
| 889. | <i>Lamprichthys tanganicanus</i>                                        | Tanganyika pearl killie       |
| 890. | <i>Lamprologus attenuatus</i>                                           | Marbled lamprologus           |
| 891. | <i>Lamprologus brevis</i>                                               | Brevis                        |
| 892. | <i>Lamprologus brichardi</i> = <i>Nelamprologus elongatus</i>           | Lyretail lamprologus          |
| 893. | <i>Lamprologus buscheri</i>                                             | Striped lamprologus           |
| 894. | <i>Lamprologus callipterus</i>                                          | Callipterus                   |
| 895. | <i>Lamprologus calvus</i>                                               | Pearly lamprologus            |
| 896. | <i>Lamprologus compressiceps</i>                                        | Compressiceps                 |
| 897. | <i>Lamprologus congolensis</i>                                          | Congo lamprologus             |
| 898. | <i>Lamprologus cunningtoni</i>                                          | Black lamprologus             |
| 899. | <i>Lamprologus elongatus</i>                                            | Elongatus                     |
| 900. | <i>Lamprologus fasciatus</i>                                            | Barred lamprologus            |
| 901. | <i>Lamprologus furcifer</i>                                             |                               |
| 902. | <i>Lamprologus kendali</i> = <i>Leidiolamprologus kendali</i>           | Nkambe                        |
| 903. | <i>Lamprologus leleupi</i>                                              | Lemon cichlid                 |
| 904. | <i>Lamprologus melas</i>                                                | Dusky lemon cichlid           |
| 905. | <i>Lamprologus moerii</i>                                               | Moer's lemprologus            |
| 906. | <i>Lamprologus pleuromaculatus</i>                                      | Pleuromaculatus               |
| 907. | <i>Lamprologus savoryi elongatus</i>                                    | Lyretail lamprologus          |
| 908. | <i>Lamprologus</i> sp "Margarae"                                        | Margara/Magara shell dweller  |
| 909. | <i>Lamprologus</i> spp                                                  |                               |
| 910. | <i>Lamprologus tretocephalus</i>                                        | Five bar cichlid              |
| 911. | <i>Lamprologus wernerii</i>                                             |                               |
| 912. | <i>Laubuca dadiburjori</i>                                              | Dadio                         |
| 913. | <i>Laubuca laubuca</i>                                                  | Indian hatchett fish          |
| 914. | <i>Lebiasina bimaculata</i>                                             | Two-spotted lebiasina         |
| 915. | <i>Lebiasina Panamensis</i>                                             | Panama pencilfish             |
| 916. | <i>Lebistes reticulatus</i> = <i>Poecilia reticulata</i>                | Guppy/million's fish          |
| 917. | <i>Lefua costata</i>                                                    | Lefua                         |
| 918. | <i>Leiarius pictus</i>                                                  | Salfin pimelodid              |
| 919. | <i>Leiocassis branshnikowi</i>                                          | Russian catfish               |
| 920. | <i>Leiocassis poeciliopterus</i>                                        | Bee cat                       |
| 921. | <i>Leiocassis siamensis</i>                                             | Barred siamese catfish        |
| 922. | <i>Lepidarchus adonis</i>                                               | Adonis                        |
| 923. | <i>Lepidocephalus goalparensis</i>                                      |                               |
| 924. | <i>Lepidocephalus guniea</i>                                            |                               |
| 925. | <i>Lepidocephalus thermalis</i>                                         | Lesser loach                  |
| 926. | <i>Lepidogalaxias salamandroides</i>                                    | Long-finned galaxias          |
| 927. | <i>Leporellus vittatus</i>                                              | Leporellus                    |
| 928. | <i>Leporinus affinis</i>                                                |                               |
| 929. | <i>Leporinus agassizi</i>                                               | Half-striped leporinus        |
| 930. | <i>Leporinus arcus</i>                                                  | Lipstick leporinus            |
| 931. | <i>Leporinus cf granti</i>                                              | Red leporinus                 |
| 932. | <i>Leporinus desmotes</i>                                               | Black and yellow leporinus    |
| 933. | <i>Leporinus fasciatus</i>                                              | Banded leprinus               |
| 934. | <i>Leporinus frederici</i>                                              | Frederici                     |

|       |                                                        |                                    |
|-------|--------------------------------------------------------|------------------------------------|
| 935.  | <i>Leporinus maculatus</i>                             | Spotted leporinus                  |
| 936.  | <i>Leporinus megalepis</i>                             | Three-spot leporinus               |
| 937.  | <i>Leporinus melanostictus</i>                         | Silver leporinus                   |
| 938.  | <i>Leporinus melanopleura</i>                          | Spot-tailed leporinus              |
| 939.  | <i>Leporinus multifasciatus</i>                        | Multi banded leporinus             |
| 940.  | <i>Leporinus nigrotæniatus</i>                         | Black-lined leporinus              |
| 941.  | <i>Leporinus ???ctofasciatus</i>                       | Eight-banded leporinus             |
| 942.  | <i>Leporinus pearsoni</i>                              | Pearson's leporinus                |
| 943.  | <i>Leporinus pellegrini</i>                            | Spotted/pelegrins leporinus        |
| 944.  | <i>Leporinus</i> sp "Golden"                           | Golden leporinus                   |
| 945.  | <i>Leporinus striatus</i>                              | Striped leporinus                  |
| 946.  | <i>Leptobarsus hoeveni</i>                             | Pink-tailed barb                   |
| 947.  | <i>Limia caudofasciata</i>                             | Steel blue lima/blue poecilia      |
| 948.  | <i>Limia heterandria</i>                               | Dwarf/haiti lima                   |
| 949.  | <i>Limia melanogaster</i>                              | Black bellied/Blue lima            |
| 950.  | <i>Limia nicholsi</i>                                  | Nichol's lima                      |
| 951.  | <i>Limia nirofasciata</i>                              | Humpback/Black barred lima         |
| 952.  | <i>Limia ornata</i>                                    | Ornate limia                       |
| 953.  | <i>Limia versicolor</i>                                | Olive limia                        |
| 954.  | <i>Limia vittata</i>                                   | Cuban limia                        |
| 955.  | <i>Limnochromis auritus</i>                            | Auritus                            |
| 956.  | <i>Limnochromis</i> spp                                |                                    |
| 957.  | <i>Limnotilapia</i> spp                                |                                    |
| 958.  | <i>Liosomadoras oncinus</i>                            | Jaguar catfish                     |
| 959.  | <i>Liphiobagrus cyclurus</i>                           | Poison slime catfish               |
| 960.  | <i>Loricaria filamentosa</i>                           | Whiptail catfish                   |
| 961.  | <i>Loricaria parva</i>                                 | Alligator catfish                  |
| 962.  | <i>Lucania goodey</i>                                  | Bluefin killfish                   |
| 963.  | <i>Luciocharax insculptus</i>                          |                                    |
| 964.  | <i>Macrognaathus aculeatus</i>                         | Spiny eel                          |
| 965.  | <i>Macrognaathus siamensis</i>                         | Spot-finned spiny eel              |
| 966.  | <i>Macropodus chinensis</i>                            | Round-tailed paradise fish         |
| 967.  | <i>Macropodus concolor</i>                             | Black paradise fish                |
| 968.  | <i>Macropodus cupanus cupanus</i>                      | Spike-tailed paradise fish         |
| 969.  | <i>Macropodus cupanus dayi</i>                         | Brown paradise fish/day's fish     |
| 970.  | <i>Macropodus opercularis</i>                          | Paradise fish/blue combtail        |
| 971.  | <i>Macropodus opercularis concolor = M opercularis</i> | Black paradise fish                |
| 972.  | <i>Malpulutta kretseri</i>                             | Malpulutta                         |
| 973.  | <i>Mastacembelus armatus</i>                           | White spotted spiny eel            |
| 974.  | <i>Mastacembelus erythrotaenia</i>                     | Spotted fire eel                   |
| 975.  | <i>Mastacembelus pancalus</i>                          | Spiny eel                          |
| 976.  | <i>Mastacembelus paucispinnis</i>                      | Short finned spiny eel             |
| 977.  | <i>Mastacembelus zebrinus</i>                          | Zebra spiny eel                    |
| 978.  | <i>Mastacembelus circumcinctus</i>                     | Half-banded spiny eel              |
| 979.  | <i>Mastacembelus</i> sp "Smith"                        | False armatus spiny eel            |
| 980.  | <i>Megalampodus</i> sp "Rubra"                         | Red megalampodus                   |
| 981.  | <i>Megalampodus axelrodi</i>                           | Calypso tetra/Red pristella        |
| 982.  | <i>Megalampodus megalopterus</i>                       | Black phantom tetra                |
| 983.  | <i>Megalampodus sweglesi</i>                           | Red phantom tetra                  |
| 984.  | <i>Melanochromis auratus = Pseudotropheus auratus</i>  | Malawi golden cichlid              |
| 985.  | <i>Melanochromis chipokee</i>                          | Chipokee                           |
| 986.  | <i>Melanochromis crabro</i>                            | Chameleon cichlid                  |
| 987.  | <i>Melanochromis johanni</i>                           | Johanni                            |
| 988.  | <i>Melanochromis melanopterus</i>                      | Black mbuna                        |
| 989.  | <i>Melanochromis parallelus</i>                        | Parallel-striped mbuna             |
| 990.  | <i>Melanochromis perspicax</i>                         | Violet-striped mbuna               |
| 991.  | <i>Melanochromis simulans</i>                          | Longsnout mbuna                    |
| 992.  | <i>Melanochromis</i> spp                               |                                    |
| 993.  | <i>Melanochromis vermivorus</i>                        | Purple mbuna                       |
| 994.  | <i>Melanotaenia affinis</i>                            | North new guinea rainbowfish       |
| 995.  | <i>Melanotaenia boesemani</i>                          | Boesman's rainbowfish              |
| 996.  | <i>Melanotaenia coatesi</i>                            | Coates's rainbowfish               |
| 997.  | <i>Melanotaenia fluviatilis</i>                        | Pink-ear rainbowfish               |
| 998.  | <i>Melanotaenia goldei</i>                             | Goldie river rainbowfish           |
| 999.  | <i>Melanotaenia herbertaxelrodi</i>                    | Lake tebera rainbowfish            |
| 1000. | <i>Melanotaenia lacustris</i>                          | Lake kutuba rainbowfish            |
| 1001. | <i>Melanotaenia maccullochi</i>                        | Dwarf australian rainbowfish       |
| 1002. | <i>Melanotaenia monticola</i>                          | Mountain rainbowfish               |
| 1003. | <i>Melanotaenia nigrans</i>                            | Dark australian rainbowfish        |
| 1004. | <i>Melanotaenia octediensis</i>                        | Oktedi rainbowfish                 |
| 1005. | <i>Melanotaenia parkinsoni</i>                         | Parkinson's rainbowfish            |
| 1006. | <i>Melanotaenia sexlineata</i>                         | Fly river rainbowfish              |
| 1007. | <i>Melanotaenia splendida</i>                          | Pink-tailed australian rainbowfish |
| 1008. | <i>Melanotaenia trifasciata</i>                        | Banded rainbowfish                 |
| 1009. | <i>Melanotaenia tigrinus</i>                           | Tiger striped catfish              |

|       |                                                               |                                       |
|-------|---------------------------------------------------------------|---------------------------------------|
| 1010. | <i>Metynnis calichromus</i>                                   |                                       |
| 1011. | <i>Metynnis hypsauchen</i>                                    | Plain metynnis/Silver dollar          |
| 1012. | <i>Metynnis luna</i>                                          | Moon metynnis                         |
| 1013. | <i>Metynnis maculatus</i>                                     | Spotted metynnis/Silver dollar        |
| 1014. | <i>Metynnis roosevelti</i>                                    | Silver dollar                         |
| 1015. | <i>Metynnis schreitmuelleri</i>                               | Schreitmueller's metynnis             |
| 1016. | <i>Migralestes interruptus</i>                                | Congo tetra                           |
| 1017. | <i>Migralestes stormsi</i>                                    | Blue-barred congo tetra               |
| 1018. | <i>Mycrobrycon fredcochui</i>                                 | Cochui's blue tetra                   |
| 1019. | <i>Microgeophagus ramirezi</i> – <i>apistogramma ramirezi</i> | Ram/butterfly cichlid                 |
| 1020. | <i>Microglanis poecilus</i>                                   | Dwarf marbled catfish                 |
| 1021. | <i>Micropanchax macrophthalus</i>                             | Lapeye panchax                        |
| 1022. | <i>Microphis smithi</i>                                       | Large freshwater pipefish             |
| 1023. | <i>Micropoecilia branneri</i>                                 | Branner's liverbearer                 |
| 1024. | <i>Micropoecilia malanozorus</i>                              | Blue guppy                            |
| 1025. | <i>Mimagoniates barberi</i>                                   | Blue tetra/barber's tetra             |
| 1026. | <i>Mimagoniates inaequalis</i>                                | Croaking tetra                        |
| 1027. | <i>Mimagoniates microlepis</i>                                | Blue tetra                            |
| 1028. | <i>Miroglanis paraphybae</i>                                  | Bumble bee catfish                    |
| 1029. | <i>Moenkhausia agnesae</i>                                    | Agnes' tetra                          |
| 1030. | <i>Moenkhausia collettii</i>                                  | Collett's tetra                       |
| 1031. | <i>Moenkhausia copei</i>                                      | Cope's moenkhausia                    |
| 1032. | <i>Moenkhausia dichroupa</i>                                  | Spot tailed moenhausia                |
| 1033. | <i>Moenkhausia lepidura</i>                                   | Half-mast flag tetra                  |
| 1034. | <i>Moenkhausia oligolepis</i>                                 | Glass tetra                           |
| 1035. | <i>Moenkhausia pittieri</i>                                   | Diamond tetra                         |
| 1036. | <i>Moenkhausia robertsi</i>                                   | Iquitos moenkhausia                   |
| 1037. | <i>Moenkhausia sanctae-filomenae</i>                          | Red-eye tetra                         |
| 1038. | <i>Moenkhausia takasei</i>                                    | Takase's moenkhausia                  |
| 1039. | <i>Mollienesia caucana</i>                                    | South american molly                  |
| 1040. | <i>Mollienesia dominocensis</i>                               | Domingo molly                         |
| 1041. | <i>Mollienesia latipinna</i>                                  | Green sailfin molly                   |
| 1042. | <i>Mollienesia sphenops</i>                                   | Black marble molly                    |
| 1043. | <i>Mollienesia velifera</i>                                   | Salfin molly                          |
| 1044. | <i>Monocirrhus polycanthus</i>                                | South american leaf fish/leather fish |
| 1045. | <i>Monodactylus sebae</i> = <i>Psettus sebae</i>              | Finger fish                           |
| 1046. | <i>Morgurnda morgurnda</i>                                    | Persian carpet/sleepy trout           |
| 1047. | <i>Mormyrops nigricans</i>                                    |                                       |
| 1048. | <i>Morulus chrysophekaidon</i>                                | Black shark                           |
| 1049. | <i>Myloplus asterias</i>                                      | Starry myloplus                       |
| 1050. | <i>Myloplus schultzei</i>                                     | Schultzei myloplus                    |
| 1051. | <i>Mylossoma argenteum</i>                                    | Silver mylossoma                      |
| 1052. | <i>Mylossoma aureum</i>                                       | Silver dollar                         |
| 1053. | <i>Mylossoma duriventres</i>                                  | Hard-bellied characin                 |
| 1054. | <i>Mylossoma paraguayensis</i>                                | Paraguayan metynnis                   |
| 1055. | <i>Mystus bleekeri</i>                                        |                                       |
| 1056. | <i>Mystus keletius</i>                                        | Dwarf catfish                         |
| 1057. | <i>Mystus tengara</i>                                         | Pearl catfish                         |
| 1058. | <i>Mystus vittatus</i>                                        | Striped catfish                       |
| 1059. | <i>Nandus nandus</i>                                          | Nandus                                |
| 1060. | <i>Nannacara anomala</i>                                      | Golden-eyed dwarf cichlid             |
| 1061. | <i>Nannacara aureocephalus</i>                                | Golden-head dwarf cichlid             |
| 1062. | <i>Nannacara taenia</i>                                       | Lattice dwarf cichlid                 |
| 1063. | <i>Nannaethiops tritaeniatus</i>                              | Three-line african characin           |
| 1064. | <i>Nannaethiops unitaeniatus</i>                              | One-lined african characin            |
| 1065. | <i>Nannaethiops unitaeniatus</i>                              | One-lined african tetra               |
| 1066. | <i>Nannabrycon eques</i>                                      | Tube-mouthherd pencil fish            |
| 1067. | <i>Nannochrax fasciatus</i>                                   | African characidium                   |
| 1068. | <i>Nannostomus anomalis</i>                                   | Anomalus pencil fish                  |
| 1069. | <i>Nannostomus atripirangensis</i>                            | Aripara/brown pencil fish             |
| 1070. | <i>Nannostomus beckfordi</i>                                  | Golden/beckford's pencil fish         |
| 1071. | <i>Nannostomus bifasciatus</i>                                | Two-banded pencil fish                |
| 1072. | <i>Nannostomus digrammus</i>                                  | Twin-stripe pencil fish               |
| 1073. | <i>Nannostomus eques</i>                                      | Brown-tailed pencil fish              |
| 1074. | <i>Nannostomus espeii</i>                                     | Barred pencil fish                    |
| 1075. | <i>Nannostomus harrisonii</i>                                 | Harrison's pencil fish                |
| 1076. | <i>Nannostomus marginatus</i>                                 | Dwarf pencil fish                     |
| 1077. | <i>Nannostomus trifasciatus</i>                               | Three-lined pencil fish               |
| 1078. | <i>Nannostomus unifasciatus</i>                               | One-lined pencil fish                 |
| 1079. | <i>Nanochromis dimidiatus</i>                                 | Dimidiatus                            |
| 1080. | <i>Nanochromis nudiceps</i>                                   | Blue dwarf/nudiceps cichlid           |
| 1081. | <i>Nanochromis paralius</i>                                   | Dwarf cichlid                         |
| 1082. | <i>Nanochromis splendens</i>                                  | Congo dwarf cichlid                   |
| 1083. | <i>Neetroplus nematopus</i>                                   | Little lake cichlid                   |
| 1084. | <i>Nemacheilus kessleri</i>                                   | Kessler's loach                       |

|       |                                                                   |                                          |
|-------|-------------------------------------------------------------------|------------------------------------------|
| 1085. | <i>Nematobrycon amphiloxy</i>                                     | Rainbow tetra                            |
| 1086. | <i>Nematobrycon lacortei</i>                                      | Rainbow tetra                            |
| 1087. | <i>Nematobrycon palmeri</i>                                       | Emperor tetra                            |
| 1088. | <i>Nematobrycon</i> sp "gery"                                     | Gery's emperor tetra                     |
| 1089. | <i>Neolebias ansorgi</i>                                          | Ansorge's neolebias                      |
| 1090. | <i>Neolebias landgrafi</i>                                        | Blue banded neolebias                    |
| 1091. | <i>Neolebias trewavasae</i>                                       | Trewava's neolebias                      |
| 1092. | <i>Neolebias trilineatus</i>                                      | Three-lined neolebias                    |
| 1093. | <i>Nerophis opaidon</i>                                           | Straight-nosed pipefish                  |
| 1094. | <i>Nomorhamphus celebensis</i>                                    | Celebes half-break                       |
| 1095. | <i>Nomorhamphus liemi</i>                                         | Black-finned celebes halfbeak            |
| 1096. | <i>Nothobranchius foerschi</i> = <i>Nothobranchius palmouisti</i> |                                          |
| 1097. | <i>Nothobranchius furzeri</i>                                     | Turquoise killerfish                     |
| 1098. | <i>Nothobranchius guentheri</i>                                   | Gunter's nothobranch                     |
| 1099. | <i>Nothobranchius janpappi</i>                                    | Topwater fire killie                     |
| 1100. | <i>Nothobranchius jubbi</i>                                       | Blue notho                               |
| 1101. | <i>Nothobranchius korthausae</i>                                  | Kothaus's killie                         |
| 1102. | <i>Nothobranchius lourensi</i>                                    | Green notho                              |
| 1103. | <i>Nothobranchius mayeri</i>                                      | Meyer's nothobranch                      |
| 1104. | <i>Nothobranchius melanospilus</i>                                | Beira nothobranch                        |
| 1105. | <i>Nothobranchius palmouisti</i> = <i>Nothobranchius foerschi</i> | Palmouists's nothobranch                 |
| 1106. | <i>Nothobranchius patrizii</i>                                    | Red-tailed turquoise notho/patrizis not  |
| 1107. | <i>Notopterus chitala</i>                                         | Clown knifefish                          |
| 1108. | <i>Notopterus mikereedi</i>                                       | Clown knifefish                          |
| 1109. | <i>Ocellatus astronatus</i>                                       | Oscar                                    |
| 1110. | <i>Oligolepsis acutipennis</i>                                    | Sharp tail goby                          |
| 1111. | <i>Ophthalmochromis</i> spp                                       |                                          |
| 1112. | <i>Ophthalmochromis ventralis</i>                                 | Yellow-tipped ventralis                  |
| 1113. | <i>Ophthalmochromis nasutus</i>                                   | Long-nosed gold-tip cichlid              |
| 1114. | <i>Ophthalmotilapia</i> spp                                       |                                          |
| 1115. | <i>Ophthalmotilapia ventralis</i>                                 | Blue cold-tip cichlid                    |
| 1116. | <i>Osphronemus couramy</i>                                        | Giant courami                            |
| 1117. | <i>Osteochilus ferreirai</i>                                      | Black arowana                            |
| 1118. | <i>Osteochilus hasselti</i>                                       | Hard-lipped barb                         |
| 1119. | <i>Osteochilus vittatus</i>                                       | Bony-lipped barb                         |
| 1120. | <i>Osteoglossum bicirrhosum</i>                                   | Arowana                                  |
| 1121. | <i>Osteoglossum ferreirai</i>                                     | Black arowana                            |
| 1122. | <i>Otocinclus affinis</i>                                         | Midget sucker catfish                    |
| 1123. | <i>Otocinclus arnoldi</i>                                         | Alcae eater/sucker catfish               |
| 1124. | <i>Otocinclus flexilis</i>                                        | Imitator sucker catfish                  |
| 1125. | <i>Otocinclus mariae</i>                                          | Maria's otocinclus                       |
| 1126. | <i>Otocinclus nattereri</i>                                       | Natterer's otocinclus                    |
| 1127. | <i>Otocinclus nigricauda</i>                                      | Black-tail sucker catfish                |
| 1128. | <i>Otocinclus vittatus</i>                                        | Striped sucker catfish                   |
| 1129. | <i>Oxyeleotris marmorata</i>                                      | Marbled sleeper coby                     |
| 1130. | <i>Pachypanchax homalonotus</i>                                   | Powder-blue panchax/green panchax        |
| 1131. | <i>Pachypanchax playfairi</i>                                     | Golden panchax                           |
| 1132. | <i>Panaque nigrolineatus</i>                                      | Panaque catfish                          |
| 1133. | <i>Panaque suttoni</i>                                            | Blue-eyed panaque                        |
| 1134. | <i>Pangasius pangasius</i>                                        |                                          |
| 1135. | <i>Pangasius sutchi</i>                                           | Pangasius cat/bkye catfug/suanese sha ?? |
| 1136. | <i>Pantodon buchholzi</i>                                         | Butterfly fish                           |
| 1137. | <i>Paracheirodon axelrodi</i>                                     | Cardinal tetra                           |
| 1138. | <i>Paracheirodon innesi</i>                                       | Neon tetra                               |
| 1139. | <i>Paracheirodon simulans</i>                                     | False neon                               |
| 1140. | <i>Parailia</i> spp                                               | Glass knifefish                          |
| 1141. | <i>Parailia congica</i>                                           | Congo African glass catfish              |
| 1142. | <i>Parailia longifilis</i>                                        | Mottled glass catfish                    |
| 1143. | <i>Parailia occidentalis</i>                                      | West African glass catfish               |
| 1144. | <i>Parapocryptes serperaster</i>                                  | Slim mudskipper                          |
| 1145. | <i>Parapristella georgiae</i>                                     | Plain jane                               |
| 1146. | <i>Parauchenipterus galeatus</i>                                  | Starry cat                               |
| 1147. | <i>Parauchenoglanis guttatus</i>                                  | African flathead catfish                 |
| 1148. | <i>Parauchenoglanis macrostoma</i>                                | African spotted catfish                  |
| 1149. | <i>Parodon affinis</i>                                            | Paraguay darter tetra                    |
| 1150. | <i>Parodon caliensis</i>                                          | Barred darter tetra                      |
| 1151. | <i>Parodon piracicabae</i>                                        | Brazilian darter tetra                   |
| 1152. | <i>Parodon pongoense</i>                                          | Pongo pongo                              |
| 1153. | <i>Parosphromenus nanyi</i>                                       | Nagy's licorice gourami                  |
| 1154. | <i>Parosphromenus paludicola</i>                                  | Pallid licorice gourami                  |
| 1155. | <i>Parosphromenus parvulus</i>                                    | Pycmy licorice gourami                   |
| 1156. | <i>Parosphromenus deissneri</i>                                   | Licorice gourami                         |
| 1157. | <i>Parosphromenus filamentosus</i>                                | Spike-tailed licorice gourami            |
| 1158. | <i>Parotocinclus maculicauda</i>                                  | Redfin otocinclus                        |
| 1159. | <i>Peckoltia brevis</i>                                           | Spotted head peckoltia                   |

|       |                                                        |                                                |
|-------|--------------------------------------------------------|------------------------------------------------|
| 1160. | <i>Peckoltia pulcher</i>                               | Pretty peckoltia                               |
| 1161. | <i>Peckoltia vittata</i>                               | Banded peckolita                               |
| 1162. | <i>Pedalibrycon felipponei</i>                         | Uruguay characin                               |
| 1163. | <i>Pelmatochromis arnoldi</i>                          | Arnold's cichlid                               |
| 1164. | <i>Pelmatochromis guentheri</i>                        | Guenther's mouthbrooder                        |
| 1165. | <i>Pelmatochromis humilis</i>                          | Kasewe krib                                    |
| 1166. | <i>Pelmatochromis klugei</i>                           | Kluge's dwarf cichlid                          |
| 1167. | <i>Pelmatochromis kribensis</i>                        | Kribensis/purple cichlid                       |
| 1168. | <i>Pelmatochromis pulcher = Pelvicachromis pulcher</i> | Kribensis                                      |
| 1169. | <i>Pelmatochromis subocellatus</i>                     | Violet cichlid                                 |
| 1170. | <i>Pelmatochromis taeniatus</i>                        | Striped African dwarf cichlid                  |
| 1171. | <i>Pelmatochromis thomasi = Hemichromis thomasi</i>    | Butterfly/Thomas's cichlid                     |
| 1172. | <i>Pelmatochromis pulcher = Pelmatochromis pulcher</i> | Kribensis                                      |
| 1173. | <i>Pelmatochromis roloffi</i>                          | Roloff's kribensis                             |
| 1174. | <i>Pelvicachromis subocellatus</i>                     | Ocellated kribensis                            |
| 1175. | <i>Pelmatochromis taeniatus</i>                        | Striped kribensis                              |
| 1176. | <i>Periophthalmus barbarus</i>                         | Mudskipper                                     |
| 1177. | <i>Periophthalmus papilo</i>                           | Butterfly mudskipper                           |
| 1178. | <i>Periophthalmus vulgaris</i>                         | Flagfin mudskipper                             |
| 1179. | <i>Perrunichthys perruno</i>                           | Reticulated pimelodid/ perrunc/leopard catfish |
| 1180. | <i>Petersius occidentalis</i>                          |                                                |
| 1181. | <i>Petitella georgiae</i>                              | False rummynose                                |
| 1182. | <i>Petrotilapia nigra</i>                              | Dusky petrotilapia                             |
| 1183. | <i>Petrotilapia tridentiger</i>                        | Blue petrotilapia                              |
| 1184. | <i>Phallichthys amates</i>                             | Merry widow                                    |
| 1185. | <i>Phallichthys pittieri</i>                           | Orange dorsal-fin livebearer                   |
| 1186. | <i>Phenacogaster pectinatus</i>                        | Pectinatus                                     |
| 1187. | <i>Phenacogrammus caudomaculatus</i>                   | Moon tetra                                     |
| 1188. | <i>Phenacogrammus deheynei</i>                         | Deheynei's congo tetra                         |
| 1189. | <i>Phenacogrammus interruptus</i>                      | Congo tetra                                    |
| 1190. | <i>Phenacogrammus</i> sp "Diamond Congo"               | Diamond Congo tetra                            |
| 1191. | <i>Phenaconiates macrolepis</i>                        | Barred glass tetra                             |
| 1192. | <i>Phoxinopsis typicus</i>                             | Black-line tetra                               |
| 1193. | <i>Phractocephalus hemiliopterus</i>                   | Red-tailed catfish                             |
| 1194. | <i>Phractolaemus ansorgei</i>                          | African mudfish                                |
| 1195. | <i>Phractura ansorgei</i>                              | African whiptailed catfish                     |
| 1196. | <i>Phyllonemus typus</i>                               | Spatula-barbeled catfish                       |
| 1197. | <i>Physalia pellucida</i>                              | African glass fish                             |
| 1198. | <i>Piabucus caudomaculatus</i>                         | Spot-tailed slender tetra                      |
| 1199. | <i>Piabucus dentatus</i>                               | Golden-striped slender tetra                   |
| 1200. | <i>Pimelodella clarias</i>                             | Spotted pimelodella                            |
| 1201. | <i>Pimelodella dorseyi</i>                             | Dorsey's pimelodella                           |
| 1202. | <i>Pimelodella lateristica</i>                         |                                                |
| 1203. | <i>Pimelodella linami</i>                              | Linam's pimelodella                            |
| 1204. | <i>Pimelodella metae</i>                               | Pimelodella                                    |
| 1205. | <i>Pimelodella parnahybae</i>                          | Parnahyba pimelodella                          |
| 1206. | <i>Pimelodella pictus</i>                              | Angelicus catfish                              |
| 1207. | <i>Pimelodus albofasciatus</i>                         | White-striped pimelodid                        |
| 1208. | <i>Pimelodus blochi</i>                                | Dusky pimelodid                                |
| 1209. | <i>Pimelodus mucalatus</i>                             | Spotted pimelodid                              |
| 1210. | <i>Pimelodus ornatus</i>                               | Ornate pimelodus                               |
| 1211. | <i>Pimelodus pictus</i>                                | Angelicus pimelodus                            |
| 1212. | <i>Pimelodus megalopterus</i>                          | Pictus                                         |
| 1213. | <i>Pinirampus piranampu</i>                            | Long-finned catfish                            |
| 1214. | <i>Platydoras costatus</i>                             | White candy striped American catfish           |
| 1215. | <i>Platystacus cotylephorus</i>                        | Mottled whiptailed banjo catfish               |
| 1216. | <i>Platystomatichthys sturio</i>                       | Sturgeon catfish                               |
| 1217. | <i>Platytrapius siamensis</i>                          | False siamese shark                            |
| 1218. | <i>Plecostomus bolivianus</i>                          | Bolivian sucker catfish                        |
| 1219. | <i>Plecostomus hypostomus</i>                          | Sucker catfish                                 |
| 1220. | <i>Plecostomus plecostomus</i>                         | Pluto/sucker catfish                           |
| 1221. | <i>Plecostomus punctatus</i>                           | Plecostomos/sucker catfish                     |
| 1222. | <i>Poecilia caucana</i>                                | Cauca molly                                    |
| 1223. | <i>Poecilia dominicensis</i>                           | Dominican limia                                |
| 1224. | <i>Poecilia latipinna</i>                              | Sailfin molly                                  |
| 1225. | <i>Poecilia melanogaster</i>                           | Black-bellied limia                            |
| 1226. | <i>Poecilia Mexicana</i>                               | Mixican molly/shortfin molly                   |
| 1227. | <i>Poecilia Nigrofasciata</i>                          | Humpbacked limia                               |
| 1228. | <i>Poecilia ornata</i>                                 | Ornate limia                                   |
| 1229. | <i>Poecilia parae</i>                                  | Two-spot livebearer                            |
| 1230. | <i>Poecilia reticulata = Lebistes reticulatus</i>      | Guppy/million's fish                           |
| 1231. | <i>Poecilia sphenops</i>                               | Sphenops molly/molly                           |
| 1232. | <i>Poecilia velifera</i>                               | Sailfin molly                                  |
| 1233. | <i>Poecilia vittata</i>                                | Molly/banded lima                              |
| 1234. | <i>Poecilia vivipara</i>                               | One-spot livebearer                            |



|       |                                                       |                                      |
|-------|-------------------------------------------------------|--------------------------------------|
| 1235. | <i>Poeciliopsis gracilis</i>                          | Porthole livebearer                  |
| 1236. | <i>Poecilistes pleurospilus</i>                       | Port hole fish/port hole live-bearer |
| 1237. | <i>Poecilobrycon digrammus</i>                        | Two-striped pencil fish              |
| 1238. | <i>Poecilobrycon eques</i>                            | Pencil/black-tailed pencil fish      |
| 1239. | <i>Poecilobrycon espei</i>                            | Barred pencil fish                   |
| 1240. | <i>Poecilobrycon unifasciatus</i>                     | Pencil fish                          |
| 1241. | <i>Poecilocharax weitzmani</i>                        | Black darter tetra                   |
| 1242. | <i>Polycentropsis abbreviata</i>                      | African leaf fish                    |
| 1243. | <i>Polycentrus schomburgki</i>                        | South American leaf fish/Schomburgki |
| 1244. | <i>Polypterus bichir</i>                              | Nile bichir                          |
| 1245. | <i>Polypterus enlicheri</i>                           | Serpent head                         |
| 1246. | <i>Polypterus ornatipinnis</i>                        | Ornate bichir                        |
| 1247. | <i>Polypterus palmas</i>                              | Polypterus palmas/marbled bichir     |
| 1248. | <i>Polypterus retrapinnis</i>                         | Marbled bichir                       |
| 1249. | <i>Polypterus spp</i>                                 | Bichir                               |
| 1250. | <i>Popondetta connieae</i>                            | Popondetta rainbowfish               |
| 1251. | <i>Popondetta furcata</i>                             | Forktail fainbowfish                 |
| 1252. | <i>Poptela orbicularis</i>                            | Silver disc tetra                    |
| 1253. | <i>Potamorraphis guianensis</i>                       | Freshwater needle fish               |
| 1254. | <i>Potamorhina latior</i>                             | Silver curimata                      |
| 1255. | <i>Potamorhina squamoraievis</i>                      | Big-tail curimata                    |
| 1256. | <i>Priapella intermedia</i>                           | Blue-eyed livebearer                 |
| 1257. | <i>Priapichthys chocoensis</i>                        | Colombian diamond-scale              |
| 1258. | <i>Prionobrama filigera</i>                           | Glass bloodfin tetra                 |
| 1259. | <i>Prionobrama paraguayensis</i>                      | Southern bloodfin                    |
| 1260. | <i>Pristella maxillaris</i>                           | Pristella                            |
| 1261. | <i>Pristella riddlei</i>                              | X-Ray fish/watergold finch           |
| 1262. | <i>Pristigaster cayana</i>                            | Amazonian hatchet herring            |
| 1263. | <i>Procatopus aberrans</i>                            | Grren lampeye                        |
| 1264. | <i>Procatopus gracilis</i>                            | Powder-blue lampeye                  |
| 1265. | <i>Procatopus nototaenia</i>                          | Blue-lady minnow                     |
| 1266. | <i>Procatopus similis</i>                             | Nigerian lampeye                     |
| 1267. | <i>Procatopus sp "fire tail"</i>                      | Firetail lampeye                     |
| 1268. | <i>Prochilodus insignius</i>                          | Prochilodus/insignius tetra          |
| 1269. | <i>Prochilodus nigricans</i>                          | Black prochilodus/spotted smallmouth |
| 1270. | <i>Prochilodus ortonianus</i>                         | Gray prochilodus                     |
| 1271. | <i>Prochilodus taeniurus</i>                          | Silver prochilodus                   |
| 1272. | <i>Psettus sebae = Monodactylus sebae</i>             | Finger fish                          |
| 1273. | <i>Pseudacanthicus leopardus</i>                      | Orange trim sucker catfish           |
| 1274. | <i>Pseudauchenipterus nodosus</i>                     | Black tailband catfish               |
| 1275. | <i>Pseudepapterus hasemani</i>                        | Haseman's woodcat                    |
| 1276. | <i>Pseudobagrus fulvidraco</i>                        | Tawny dragon catfish                 |
| 1277. | <i>Pseudochaleaus kyburzi</i>                         | Kyburz tetra                         |
| 1278. | <i>Pseudocorynopoma doriae</i>                        | Dragon-finned characin               |
| 1279. | <i>Pseudodoras niger</i>                              | Black doradid                        |
| 1280. | <i>Pseudogastromyzon myersi</i>                       | Myer's hillstream loach              |
| 1281. | <i>Pseudomugil gertrudae</i>                          | Gertrude's blue eye                  |
| 1282. | <i>Pseudomugil inconspicuus</i>                       | Inconspicuous blue-eye               |
| 1283. | <i>Pseudomugil paludicola</i>                         | Swamp blue-eye                       |
| 1284. | <i>Pseudomugil signifer</i>                           | Southern blue eye                    |
| 1285. | <i>Pseudomugil tenellus</i>                           | Delicate blue eye                    |
| 1286. | <i>Pseudopimelodus albomarcinatus</i>                 | Black-banded pimelodid               |
| 1287. | <i>Pseudopimelodus nigricauda</i>                     | Mottled pseudopimelodid              |
| 1288. | <i>Pseudopimelodus transmontanus</i>                  | Peruvian mottled catfish             |
| 1289. | <i>Pseudoplatystoma fasciatum</i>                     | Tiger catfish                        |
| 1290. | <i>Pseudosphromenus cupanus cupanus</i>               | Spiketail paradise fish              |
| 1291. | <i>Pseudotropheus auratus = Melanochromis auratus</i> | Auratus/lake Nyassa characin         |
| 1292. | <i>Pseudotropheus brevis</i>                          | Silver-blue mbuna                    |
| 1293. | <i>Pseudotropheus crabro</i>                          |                                      |
| 1294. | <i>Pseudotropheus elongatus</i>                       | Slender mbuna                        |
| 1295. | <i>Pseudotropheus lanisticola</i>                     | Slender mbuna/snail shell mbuna      |
| 1296. | <i>Pseudotropheus livingstoni</i>                     | Snail shell mbuna                    |
| 1297. | <i>Pseudotropheus lombardoi</i>                       | Kennyi                               |
| 1298. | <i>Pseudotropheus microstoma</i>                      | Small-mouth tropheops                |
| 1299. | <i>Pseudotropheus novemfasciatus</i>                  | Novemfasciatus                       |
| 1300. | <i>Pseudotropheus ornatus</i>                         | Bumble-bee characin                  |
| 1301. | <i>Pseudotropheus sp "dusky lavender cichlid"</i>     | Dusky lavender cichlid               |
| 1302. | <i>Pseudotropheus sp "dusky"</i>                      | Dusky mbuna                          |
| 1303. | <i>Pseudotropheus sp "eduardi"</i>                    | Eduardi                              |
| 1304. | <i>Pseudotropheus sp "orange"</i>                     | Orange mbuna                         |
| 1305. | <i>Pseudotropheus spp</i>                             |                                      |
| 1306. | <i>Pseudotropheus tropheops</i>                       | Mblina/tropheopos                    |
| 1307. | <i>Pseudotropheus williamsi</i>                       | William's mbuna                      |
| 1308. | <i>Pseudotropheus zebra</i>                           | Zebra characin/Nyassa blue cichlid   |
| 1309. | <i>Pseudoxiphophorus bimaaculatus</i>                 | False swordtail                      |

|       |                                         |                                      |
|-------|-----------------------------------------|--------------------------------------|
| 1310. | <i>Pterodiscus levis</i>                | Silver hatchett fish                 |
| 1311. | <i>Pterophyllum altum</i>               | Deep angel fish                      |
| 1312. | <i>Pterophyllum dumerili</i>            | Long-nose angel fish                 |
| 1313. | <i>Pterophyllum eimekei</i>             | Lesser angel fish                    |
| 1314. | <i>Pterophyllum scalare</i>             | Angel fish                           |
| 1315. | <i>Pterycoplichthys anisitsi</i>        | Snow-king sucker catfish             |
| 1316. | <i>Pterycoplichthys bolivianus</i>      | Bolivian sucker catfish              |
| 1317. | <i>Pterycoplichthys gibbiceps</i>       | Sailfin sucker catfish               |
| 1318. | <i>Pterolebias longipinnis</i>          | Peruvian longfin                     |
| 1319. | <i>Pterolebias peruensis</i>            | Peruvian longfin                     |
| 1320. | <i>Pterolebias wischmanni</i>           | Wischmann's pterolebias              |
| 1321. | <i>Pterolebias zonatus</i>              | Lace finned killie                   |
| 1322. | <i>Puntiapiplus practozoron</i>         | Yellow chequered barb                |
| 1323. | <i>Puntius bimaculatus</i>              | Two spot barb                        |
| 1324. | <i>Puntius conchonius</i>               | Rosy barb                            |
| 1325. | <i>Puntius cummingi</i>                 | Cumming's barb                       |
| 1326. | <i>Puntius everetti</i>                 | Clown barb                           |
| 1327. | <i>Puntius filamentosus</i>             | Filament/black spot barb             |
| 1328. | <i>Puntius celius</i>                   | Dwarf/miniature barb                 |
| 1329. | <i>Puntius lateristiga</i>              | Spanner barb                         |
| 1330. | <i>Puntius lineatus</i>                 | Striped barb                         |
| 1331. | <i>Puntius nigrofasciatus</i>           | Black ruby barb                      |
| 1332. | <i>Puntius oligolepis</i>               | Cgequered barb ??                    |
| 1333. | <i>Puntius pentazona</i>                | Fuve babded barb                     |
| 1334. | <i>Puntius phutunio</i>                 | Dwarf barb                           |
| 1335. | <i>Puntius sachi</i>                    | Cold barb                            |
| 1336. | <i>Puntius semifasciolatus</i>          | Half banded barb                     |
| 1337. | <i>Puntius sonphongsi</i>               | Sonphong's barb                      |
| 1338. | <i>Puntius stigma</i>                   | Two-spot barb                        |
| 1339. | <i>Puntius stigmatopygus</i>            | Mid-spot barb                        |
| 1340. | <i>Puntius stoliczkai</i>               | Stoliczka's barb                     |
| 1341. | <i>Puntius sylvaticus</i>               | Sylvan barb                          |
| 1342. | <i>Puntius tetrazona</i>                | Tiger barb                           |
| 1343. | <i>Puntius ticto</i>                    | Ticto/tic-tac-toe barb               |
| 1344. | <i>Puntius vittatus</i>                 | Banded barb                          |
| 1345. | <i>Puntius wohlerti</i>                 | Sickle barb                          |
| 1346. | <i>Pyrrhulina brevis</i>                | Short pyrrhulina                     |
| 1347. | <i>Pyrrhulina laeta</i>                 | Half banded pyrrhulina               |
| 1348. | <i>Pyrrhulina nattersi</i>              | Natter's pyrrhulina                  |
| 1349. | <i>Pyrrhulina nigrofasciata</i>         | Black banded pyrrhulina              |
| 1350. | <i>Pyrrhulina rachoviana</i>            | Rachow's pyrrhulina/fanning characin |
| 1351. | <i>Pyrrhulina</i> sp "red spotted"      | Red spotted pyrrhulina               |
| 1352. | <i>Pyrrhulina</i> sp "short-lined No 2" | Short-lined pyrrhulina No 2          |
| 1353. | <i>Pyrrhulina spicata</i>               |                                      |
| 1354. | <i>Pyrrhulina spp</i>                   |                                      |
| 1355. | <i>Pyrrhulina vittata</i>               | Striped/banded pyrrhulina            |
| 1356. | <i>Quintana .....isona ??</i>           | Black-barred livebearer              |
| 1357. | <i>Rachovia brevis</i>                  | Magdalena spot-finned killie         |
| 1358. | <i>Rachovia hummelincki</i>             | Coastal spot-finned killie           |
| 1359. | <i>Rachovia maculipinnis</i>            | Venezuelan spot-finned killie        |
| 1360. | <i>Rachovia pyropunctata</i>            | Red-spotted spot-finned killie       |
| 1361. | <i>Raiamas ansorghi</i>                 | Black-barred barilius                |
| 1362. | <i>Rasbora agilis</i>                   | Black striped rasbora                |
| 1363. | <i>Rasbora argyrotaenia</i>             | Silver rasbora                       |
| 1364. | <i>Rasbora altior</i>                   | Green false rasbora                  |
| 1365. | <i>Rasbora bankanensis</i>              | Banka rasbora                        |
| 1366. | <i>Rasbora borapetens</i>               | Red tailed rasbora                   |
| 1367. | <i>Rasbora brittani</i>                 | Brittan's rasbora                    |
| 1368. | <i>Rasbora caudimaculata</i>            | Greater scissor tail rasbora         |
| 1369. | <i>Rasbora cephalotaenia</i>            | Port hole rasbora                    |
| 1370. | <i>Rasbora chrysotaenia</i>             | Gold striped rasbora                 |
| 1371. | <i>Rasbora daniconius</i>               | Slender rasbora                      |
| 1372. | <i>Rasbora dorsiocellata</i>            | Eye-spot/hi-spot rasbora             |
| 1373. | <i>Rasbora dusonensis</i>               | Yellowtail rasbora                   |
| 1374. | <i>Rasbora einthoveni</i>               | Brilliant rasbora                    |
| 1375. | <i>Rasbora elegans</i>                  | Two-spot/elegant rasbora             |
| 1376. | <i>Rasbora hengeli</i>                  | Red rasbora                          |
| 1377. | <i>Rasbora heteromorpha</i>             | Harlequin fish                       |
| 1378. | <i>Rasbora jacobsoni</i>                | Jacobson's rasbora                   |
| 1379. | <i>Rasbora kalochroma</i>               | Big spot rasbora                     |
| 1380. | <i>Rasbora kobonensis</i>               |                                      |
| 1381. | <i>Rasbora kobonensis</i>               | Copper striped rasbora               |
| 1382. | <i>Rasbora laptosoma</i>                | Yellow/elegant rasbora               |
| 1383. | <i>Rasbora maculate</i>                 | Spotted/pygmy rasbora                |
| 1384. | <i>Rasbora meinkeni</i>                 | Meinken's rasbora                    |

|       |                                                             |                                         |
|-------|-------------------------------------------------------------|-----------------------------------------|
| 1385. | <i>Rasbora myersi</i>                                       | Meyer's rasbora                         |
| 1386. | <i>Rasbora pauciperforata</i>                               | Red lined/glowlight rasbora             |
| 1387. | <i>Rasbora philippina</i>                                   | Philippine rasbora                      |
| 1388. | <i>Rasbora rasbora</i>                                      | Rasbora                                 |
| 1389. | <i>Rasbora somphangsi</i>                                   | Samphang's rasbora                      |
| 1390. | <i>Rasbora sarawakensis</i>                                 | Sarawak's rasbora                       |
| 1391. | <i>Rasbora steineri</i>                                     | Chinese rasbora                         |
| 1392. | <i>Rasbora sumatrana</i>                                    | Sumatran rasbora                        |
| 1393. | <i>Rasbora taeniata</i>                                     | Black-striped rasbora                   |
| 1394. | <i>Rasbora tornieri</i>                                     | Yellow tailed rasbora                   |
| 1395. | <i>Rasbora trilineata</i>                                   | Three-lined/scissor-tail rasbora        |
| 1396. | <i>Rasbora urophthalma</i>                                  | Miniature/dwarf/ocellated/point rasbora |
| 1397. | <i>Rasbora vaterifloris</i>                                 | Ceylon fire barb/fire rasbora           |
| 1398. | <i>Rasborichthys altior</i>                                 | Green rasbora                           |
| 1399. | <i>Reganochromis calliurus</i>                              | Calliurus                               |
| 1400. | <i>Rhabdolichops troscheli</i>                              | Short-headed knife fish                 |
| 1401. | <i>Rhadinocentrus ornatus</i>                               | Southern soft-spined rainbow fish       |
| 1402. | <i>Rhinomugil corsula</i>                                   |                                         |
| 1403. | <i>Rineloricaria castroi</i>                                | Castro's whiptail catfish               |
| 1404. | <i>Rineloricaria fallax</i>                                 |                                         |
| 1405. | <i>Rineloricaria filamentosa = Dasylicardia filamentosa</i> |                                         |
| 1406. | <i>Rineloricaria hasemani</i>                               | Haseman's whiptail catfish              |
| 1407. | <i>Rineloricaria lanceolata</i>                             | Lanceolate whiptail catfish             |
| 1408. | <i>Rineloricaria microlepidogaster</i>                      | Small-scaled whiptail catfish           |
| 1409. | <i>Rineloricaria parva</i>                                  |                                         |
| 1410. | <i>Rita rita</i>                                            |                                         |
| 1411. | <i>Rivulus agilae</i>                                       | Agila rivulus                           |
| 1412. | <i>Rivulus amphoreus</i>                                    | Guianas rivulus                         |
| 1413. | <i>Rivulus atratus</i>                                      | Butterfly rivulus                       |
| 1414. | <i>Rivulus beniensis</i>                                    | Reticulated rivulus                     |
| 1415. | <i>Rivulus compressus</i>                                   | Blue rivulus                            |
| 1416. | <i>Rivulus cryptocallus</i>                                 | Iridescent rivulus                      |
| 1417. | <i>Rivulus c.....indraceus ???</i>                          | Cuban/green brown rivulus               |
| 1418. | <i>Rivulus dorni</i>                                        | Dorn's rivulus                          |
| 1419. | <i>Rivulus harti</i>                                        | Hart's rivulus                          |
| 1420. | <i>Rivulus holmiae</i>                                      | Golden-tailed rivulus                   |
| 1421. | <i>Rivulus limoncochae</i>                                  | Rio napo rivulus                        |
| 1422. | <i>Rivulus magdalenae</i>                                   | Bar-tailed rivulus/Magdalena rivulus    |
| 1423. | <i>Rivulus ocellatus</i>                                    | Ocellated rivulus                       |
| 1424. | <i>Rivulus peruanus</i>                                     | Perimparoo rivulus                      |
| 1425. | <i>Rivulus punctatus</i>                                    | Spotted rivulus                         |
| 1426. | <i>Rivulus rolffi</i>                                       | Rolff's rivulus                         |
| 1427. | <i>Rivulus santensis</i>                                    | Santo's rivulus                         |
| 1428. | <i>Rivulus strigatus</i>                                    | Herringbone rivulus                     |
| 1429. | <i>Rivulus urophthalmus</i>                                 | Golden/green rivulus                    |
| 1430. | <i>Rivulus xanthonotus</i>                                  | Yellowback rivulus                      |
| 1431. | <i>Rivulus xiphidius</i>                                    | Band-tailed rivulus                     |
| 1432. | <i>Roedoibes gautemalensis</i>                              | Guatemala glass characin                |
| 1433. | <i>Roedoibes microlepis</i>                                 | Small scaled glass characin             |
| 1434. | <i>Rohtee alfrediana</i>                                    | Copper minnow                           |
| 1435. | <i>Roloffia chayteri</i>                                    | Chayter's killie                        |
| 1436. | <i>Sartor respectus</i>                                     | Peculiar-mouthed anastomid              |
| 1437. | <i>Scatophagus argus</i>                                    | Scat/argus/spotted catfish              |
| 1438. | <i>Scatophagus argus var rubrifrons</i>                     | Tiger scat                              |
| 1439. | <i>Scatophagus tetracanthus</i>                             | African scat/African banded cat         |
| 1440. | <i>Schizodon fasciatum</i>                                  | Four-barred leporinus                   |
| 1441. | <i>Schultzites axelrodi</i>                                 | Axelrod's moenkhausia                   |
| 1442. | <i>Sciades marmoratus</i>                                   | Marbled catfish                         |
| 1443. | <i>Sciades pictus</i>                                       | Painted fish                            |
| 1444. | <i>Scortum barcoo</i>                                       | Barcoo grunter                          |
| 1445. | <i>Selenotoca multifasciata</i>                             | False scat                              |
| 1446. | <i>Semaprochilodus squamilentus</i>                         | Saifinned prochilodus                   |
| 1447. | <i>Semaprochilodus taeniurus</i>                            | Silver prochilodus                      |
| 1448. | <i>Semaprochilodus theraponura</i>                          | Flag tailed prochilodus                 |
| 1449. | <i>Sicyopterus jonklaasi = Gobius jonklaasi</i>             | Mountain coby                           |
| 1450. | <i>Simochromis curvifrons</i>                               | Thick-headed cichlid                    |
| 1451. | <i>Simochromis diagramma</i>                                | Diagramma                               |
| 1452. | <i>Simochromis spp</i>                                      |                                         |
| 1453. | <i>Simpsonichthys boitonei</i>                              | Brazilian lyrefin                       |
| 1454. | <i>Sorubim lima</i>                                         | Shovelnose catfish                      |
| 1455. | <i>Spathodus erythron</i>                                   | Blue spotted coby cichlid               |
| 1456. | <i>Spathodus spp</i>                                        |                                         |
| 1457. | <i>Sphaerichthys selatanansis</i>                           | Thin-barred chocolate gourami           |
| 1458. | <i>Sphaerichthys acrostoma</i>                              | Black-tailed chocolate gourami          |
| 1459. | <i>Sphaerichthys ospromenoides</i>                          | Chocolate gourami                       |

|       |                                                             |                                                  |
|-------|-------------------------------------------------------------|--------------------------------------------------|
| 1460. | <i>Steatocranus casuarius</i>                               | Lionhead/African blockhead cichlid               |
| 1461. | <i>Steatocranus mpozoensis</i>                              | Mpozo lionhead cichlid                           |
| 1462. | <i>Steatocranus tinanti</i>                                 | Slender lionhead cichlid                         |
| 1463. | <i>Steatogenys duidae</i>                                   | Barred knife fish                                |
| 1464. | <i>Steatogenys elegans</i>                                  | Mottled knife fish                               |
| 1465. | <i>Sternarchorhamphus muelleri</i>                          | Mueller's knife fish                             |
| 1466. | <i>Sternarchorhamphus oxyrhynchus</i>                       | Elephant-nose knifefish                          |
| 1467. | <i>Sternarchus albifrons</i>                                | Black ghost                                      |
| 1468. | <i>Sternopygus macrurus</i>                                 | Bumpy-back silver dollar                         |
| 1469. | <i>Stigmatogobius sadanundio</i> = <i>Gobius sadanundio</i> | Knight coby                                      |
| 1470. | <i>Stoneiella leopardus</i>                                 | Orange-trim sucker catfish                       |
| 1471. | ? (indistinct - to be added)                                | Whiptailed catfish/royal farowella               |
| 1472. | <i>Symphysodon aequifasciatus</i>                           | Pompadour/discus                                 |
| 1473. | <i>Symphysodon aequifasciatus aequifasciatus</i>            | Green discus                                     |
| 1474. | <i>Symphysodon aequifasciatus axelrodi</i>                  | Brown discus                                     |
| 1475. | <i>Symphysodon aequifasciatus haraldi</i>                   | Blue discus                                      |
| 1476. | <i>Symphysodon discus discus</i>                            | Red discus/pompadour                             |
| 1477. | <i>Symphysodon discus willischwartzii</i>                   | Pineapple discus                                 |
| 1478. | <i>Symphysodon cingulatus</i>                               | Funny-mouthed anostomid                          |
| 1479. | <i>Syngnathus pulchellus</i>                                | African freshwater pipefish                      |
| 1480. | <i>Syngnathus spicifer</i> = <i>Hippichthys spicifer</i>    | Belly-barbed pipefish                            |
| 1481. | <i>Synodontis acanthomias</i>                               | Black-spotted synodontis                         |
| 1482. | <i>Synodontis angelicus</i>                                 | Polka-dot African catfish                        |
| 1483. | <i>Synodontis brichardi</i>                                 | Brichard's catfish                               |
| 1484. | <i>Synodontis budgetti</i>                                  | Brown synodontis                                 |
| 1485. | <i>Synodontis congicus</i>                                  | Congo synodontis                                 |
| 1486. | <i>Synodontis contractus</i>                                | African upside-down catfish                      |
| 1487. | <i>Synodontis davidi</i>                                    | David's upside-down catfish                      |
| 1488. | <i>Synodontis decorus</i>                                   | Upside-down catfish                              |
| 1489. | <i>Synodontis flavitaeniatus</i>                            | Striped synodontis                               |
| 1490. | <i>Synodontis greshoffi</i>                                 | Greshoff's synodontis                            |
| 1491. | <i>Synodontis haugi</i>                                     | Black synodontis                                 |
| 1492. | <i>Synodontis longifrostris</i>                             | Long-nosed synodontis                            |
| 1493. | <i>Synodontis multipunctatus</i>                            | Spotted catfish                                  |
| 1494. | <i>Synodontis nigriventris</i>                              | Black-spotted catfishbellied upside-down catfish |
| 1495. | <i>Synodontis notatus</i>                                   | Spotted synodontis                               |
| 1496. | <i>Synodontis ornatipinnis</i>                              | Bar-finned upside-down catfish                   |
| 1497. | <i>Synodontis petricola</i>                                 | Even-spotted synodontis                          |
| 1498. | <i>Synodontis pleurops</i>                                  | Big-eyed upside-down catfish                     |
| 1499. | <i>Synodontis polli</i>                                     | Poll's upside down catfish                       |
| 1500. | <i>Synodontis robbianus</i>                                 | Spotfin synodontis                               |
| 1501. | <i>Synodontis robertsi</i>                                  | Large-blotched synodontis                        |
| 1502. | <i>Synodontis schoutedeni</i>                               | Vermiculated synodontis                          |
| 1503. | <i>Taeniacara candidi</i>                                   | Black-striped dwarf cichlid                      |
| 1504. | <i>Tanakia tanago</i>                                       | Miyakotanago                                     |
| 1505. | <i>Tanichthys albonubes</i>                                 | White cloud mountain                             |
| 1506. | <i>Tatia aulopygia</i>                                      | Snowflake woodcat                                |
| 1507. | <i>Tatia perugiae</i>                                       | Perugia's woodcat                                |
| 1508. | <i>Teleogramma brichardi</i>                                | Brichard's African dwarf cichlid                 |
| 1509. | <i>Telestes agassizi</i>                                    | Stromer                                          |
| 1510. | <i>Telmatherina ladigesi</i>                                | Glass neon/Celebes rainbow fish                  |
| 1511. | <i>Telmatochromis bifrenatus</i>                            | Stripped telmat                                  |
| 1512. | <i>Telmatochromis caninus</i>                               | Caninus                                          |
| 1513. | <i>Telmatochromis</i> spp                                   |                                                  |
| 1514. | <i>Telmatochromis temporalis</i>                            | Temporalis                                       |
| 1515. | <i>Telmatochromis vittatus</i>                              | Bluntheaded telmat                               |
| 1516. | <i>Tetragonopterus argenteus</i>                            | Silver tetra                                     |
| 1517. | <i>Tetragonopterus chalceus</i>                             | False silver tetra                               |
| 1518. | <i>Tetraodon cutcutia</i>                                   | Common/Malayan puffer fish                       |
| 1519. | <i>Tetraodon duboisi</i>                                    | Stanley pool puffer                              |
| 1520. | <i>Tetraodon erythrotaenia</i>                              | Red-lined puffer fish                            |
| 1521. | <i>Tetraodon fluviatilis</i>                                | Green/spotted puffer fish                        |
| 1522. | <i>Tetraodon leirus</i>                                     | Twin-spot puffer                                 |
| 1523. | <i>Tetraodon palembangensis</i>                             | Figure eight puffer fish                         |
| 1524. | <i>Tetraodon schoutedeni</i>                                | Puffer fish                                      |
| 1525. | <i>Thayeria oblique</i>                                     | Short-striped penguin                            |
| 1526. | <i>Thayeria boehlkei</i>                                    | Short-striped penguin fish                       |
| 1527. | <i>Thayeria sancgtaemariae</i>                              | Penguin fish                                     |
| 1528. | <i>Thoracocharax maculatus</i>                              | Spotted hatchet fish                             |
| 1529. | <i>Thoracocharax securis</i>                                | Long-fin hatchet fish                            |
| 1530. | <i>Thoracocharax stellatus</i>                              | Deep-bodied silver hatchet fish                  |
| 1531. | <i>Thysia ansingi</i>                                       | Five-spot African cichlid                        |
| 1532. | <i>Toxotes chatareus</i>                                    | Seven-spot archer fish                           |
| 1533. | <i>Toxotes jaculator</i>                                    | Archer fish                                      |
| 1534. | <i>Trachelyopterichthys taenatus</i>                        | Striped woodcat                                  |

|       |                                            |                                |
|-------|--------------------------------------------|--------------------------------|
| 1535. | <i>Trachycorystes trachycorystes</i>       | Indistinguished woodcat        |
| 1536. | <i>Trachydoras paraguayensis</i>           | Paraguay doradid               |
| 1537. | <i>Trematocara</i> spp                     |                                |
| 1538. | <i>Trematocranus jacobfreibergi</i>        | Jacobfreibergi                 |
| 1539. | <i>Trematocranus pterdaviesti</i>          | Banded trematocranus           |
| 1540. | <i>Trematocranus</i> spp                   |                                |
| 1541. | <i>Triacanthus brevirostris</i>            | Tripod fish                    |
| 1542. | <i>Trichogaster leeri</i>                  | Pearl/mosaic/large gourami     |
| 1543. | <i>Trichogaster marmoratus</i>             | Alpine gourami                 |
| 1544. | <i>Trichogaster microlepis</i>             | Moonlight/silver gourami       |
| 1545. | <i>Trichogaster pectoralis</i>             | Snakeskin gourami              |
| 1546. | <i>Trichogaster sumatrans</i> "cosby"      | Cosby gourami                  |
| 1547. | <i>Trichogaster trichopterus</i>           | Gold gourami                   |
| 1548. | <i>Trichogaster trichopterus sumatrans</i> | Blue gourami                   |
| 1549. | <i>Trichopsis pumilis</i>                  | Pygmy/dwarf/sparkling gourami  |
| 1550. | <i>Trichopsis schalleri</i>                | Three-striped croaking gourami |
| 1551. | <i>Trichopsis vittatus</i>                 | Croaking gourami               |
| 1552. | <i>Trichonectes balzani</i>                | Rivulichthys                   |
| 1553. | <i>Triconectes strigabundus</i>            | Brazilian false false panchaz  |
| 1554. | <i>Triportheus albus</i>                   | Schalcinus                     |
| 1555. | <i>Triportheus angulatus</i>               | Narrow hatchef fish            |
| 1556. | <i>Triportheus rotundatus</i>              | Black-winged triportheus       |
| 1557. | <i>Tropheus brichardi</i>                  | Blue-eyed tropheus             |
| 1558. | <i>Tropheus duboisi</i>                    | Duboisi                        |
| 1559. | <i>Tropheus moorii</i>                     | Malawi cichlid/moorii          |
| 1560. | <i>Tropheus moorii kasabae</i>             | Flat tropheus                  |
| 1561. | <i>Tropheus</i> sp "Mpulunga"              | Mpulunga tropheus              |
| 1562. | <i>Tropheus</i> spp                        |                                |
| 1563. | <i>Trylochromis lateralis</i>              | Congo tylochromis              |
| 1564. | <i>Trylochromis polylepis</i>              | Lake Tanganyika tylochromis    |
| 1565. | <i>Tyttocharax madeirae</i>                | Bristle-mouthed tetra          |
| 1566. | <i>Uara amphiacanthoides</i>               | Triangle cichlid/uaru          |
| 1567. | <i>Urumara rondoni</i>                     | Mousetail knife fish           |
| 1568. | <i>Vesicatrurus tegatus</i>                | Tegatus                        |
| 1569. | <i>Wallago attu</i>                        | Sheat catfish                  |
| 1570. | <i>Xenocara dolichoptera</i>               | Blue chin                      |
| 1571. | <i>Xenochromis</i> spp                     |                                |
| 1572. | <i>Xenomystus nigri</i>                    | Black/African knife fish       |
| 1573. | <i>Xenophorus captivus</i>                 | Green goodeid                  |
| 1574. | <i>Xenotilapia flavipinnis</i>             | Yellow-finned xenotilapia      |
| 1575. | <i>Xenotilapia ochrogenys</i>              | Red-striped xenotilapia        |
| 1576. | <i>Xenotilapia sima</i>                    | Big-eyed xenotilapia           |
| 1577. | <i>Xenotilapia spilopterus</i>             | Spilopterus                    |
| 1578. | <i>Xenotoca eiseni</i>                     | Dusky goodeid                  |
| 1579. | <i>Xenotoca melanosoma</i>                 | Red-tailed goodeid             |
| 1580. | <i>Xiphophorus cortezi</i>                 | Cortez swordtail               |
| 1581. | <i>Xiphophorus couchianus</i>              | Monterey platy                 |
| 1582. | <i>Xiphophorus helleri</i>                 | Sword-tail                     |
| 1583. | <i>Xiphophorus maculatus</i>               | Red platy                      |
| 1584. | <i>Xiphophorus montezumae</i>              | Montezuma swordtail            |
| 1585. | <i>Xiphophorus pygmaeus</i>                | Pygmy swordtail                |
| 1586. | <i>Xiphophorus variatus</i>                | Variagated/sunset platy        |
| 1587. | <i>Xiphophorus xiphidium</i>               | Northern swordtail platy       |
| 1588. | <i>Zoogoneticus quitzeoensis</i>           | Picotee goodeid                |
| 1589. | <i>Xiphophorus cortezi</i>                 | Cortez swordtail               |
| 1590. | <i>Xiphophorus couchianus</i>              | Monterey platy                 |
| 1591. | <i>Xiphophorus helleri</i>                 | Sword-tail                     |
| 1592. | <i>Xiphophorus maculatus</i>               | Red platy                      |
| 1593. | <i>Xiphophorus montezumae</i>              | Montezuma swordtail            |
| 1594. | <i>Xiphophorus pygmaeus</i>                | Pygmy swordtail                |
| 1595. | <i>Xiphophorus variatus</i>                | Variagated/sunset platy        |
| 1596. | <i>Xiphophorus xiphidium</i>               | Northern swordtail platy       |
| 1597. | <i>Zoogoneticus quitzeoensis</i>           | Picotee goodeid                |

## 2.6 Fishes (Marine) and Other Marine Species

Still under discussion.

## 2.7 Invertebrates (Fresh-water)

Still under discussion.

**2.8 Invertebrates (Terrestrial)**

| No | Species                                                            | Family         |
|----|--------------------------------------------------------------------|----------------|
|    | <b>Insects for the biological control of invasive alien plants</b> |                |
| 1  | <i>Acacia malherbae</i>                                            | Eriophyidae    |
| 2  | <i>Acanthoscelides macrophthalmus</i>                              | Bruchidae      |
| 3  | <i>Agrius hyperici</i>                                             | Buprestidae    |
| 4  | <i>Alagoasa parana</i>                                             | Chrysomelidae  |
| 5  | <i>Alcidion cereicola</i>                                          | Cerambycidae   |
| 6  | <i>Algarobius bottimeri</i>                                        | Bruchidae      |
| 7  | <i>Algarobius prosopis</i>                                         | Bruchidae      |
| 8  | <i>Aphis chloris</i>                                               | Aphididae      |
| 9  | <i>Aplocera efformata</i>                                          | Geometridae    |
| 10 | <i>Autoplusia illustrate</i>                                       | Noctuidae      |
| 11 | <i>Calycomyza lantanae</i>                                         | Agromyzidae    |
| 12 | <i>Carposina autologa</i>                                          | Carposinidae   |
| 13 | <i>Charidotus auroguttata</i>                                      | Chrysomelidae  |
| 14 | <i>Chrysolina hyperici</i>                                         | Chrysomelidae  |
| 15 | <i>Chrysolina quadrigemina</i>                                     | Chrysomelidae  |
| 16 | <i>Cydmaea binotata</i>                                            | Curculionidae  |
| 17 | <i>Cyrtobagous salviniae</i>                                       | Curculionidae  |
| 18 | <i>Dactylopius austrinus</i>                                       | Pseudococcidae |
| 19 | <i>Dactylopius ceylonicus</i>                                      | Pseudococcidae |
| 20 | <i>Dactylopius coccus</i>                                          | Pseudococcidae |
| 21 | <i>Dactylopius opuntiae</i>                                        | Pseudococcidae |
| 22 | <i>Dactylopius tomentosus</i>                                      | Pseudococcidae |
| 23 | <i>Dasineura dielsi</i>                                            | Cecidomyiidae  |
| 24 | <i>Dasineura xxx Leptos.</i>                                       | Cecidomyiidae  |
| 25 | <i>Eccritotarsus catarinensis</i>                                  | Miridae        |
| 26 | <i>Erytenna consputa</i>                                           | Curculionidae  |
| 27 | <i>Eutreta xanthochaeta</i>                                        | Tephritidae    |
| 28 | <i>Eutreta xanthochaeta</i>                                        | Tephritidae    |
| 29 | <i>Falconia intermedia</i>                                         | Miridae        |
| 30 | <i>Frumenta nephelomicta</i>                                       | Gelechiidae    |
| 31 | <i>Gargaphia decoris</i>                                           | Tingidae       |
| 32 | <i>Gratiana spadicea</i>                                           | Chrysomelidae  |
| 33 | <i>Hypogeococcus festerianus</i>                                   | Pseudococcidae |
| 34 | <i>Leptinotarsa defecta</i>                                        | Chrysomelidae  |
| 35 | <i>Leptinotarsa texana</i>                                         | Chrysomelidae  |
| 36 | <i>Leptobyrsa decora</i>                                           | Tingidae       |
| 37 | <i>Lysathia sp.</i>                                                | Chrysomelidae  |
| 38 | <i>Melanterius species (all)</i>                                   | Curculionidae  |
| 39 | <i>Mimorista pulchellais</i>                                       | Pyralidae      |
| 40 | <i>Neltumius arizonensis</i>                                       | Bruchidae      |
| 41 | <i>Neochetina bruchi</i>                                           | Curculionidae  |
| 42 | <i>Neochetina eichhorniae</i>                                      | Curculionidae  |
| 43 | <i>Neodiplograsmus quadrivittatus</i>                              | Curculionidae  |
| 44 | <i>Neohydronomus affinis</i>                                       | Curculionidae  |
| 45 | <i>Niphograpta albiguttalis</i>                                    | Pyralidae      |
| 46 | <i>Octotoma championi</i>                                          | Chrysomelidae  |
| 47 | <i>Octotoma scrabipennis</i>                                       | Chrysomelidae  |
| 48 | <i>Ophiomyia lantanae</i>                                          | Agromyzidae    |
| 49 | <i>Orthogalumna terebrantis</i>                                    | Galumnidae     |
| 50 | <i>Parectopa thalassias</i>                                        | Gracillariidae |
| 51 | <i>Pareuchaetes aurata</i>                                         | Arctiidae      |
| 52 | <i>Pareuchaetes pdeudoinsulata</i>                                 | Arctiidae      |
| 53 | <i>Phenrica guerini</i>                                            | Chrysomelidae  |
| 54 | <i>Plagiohammus spinipennis</i>                                    | Cerambycidae   |
| 55 | <i>Procecidocharis utilis</i>                                      | Tephritidae    |
| 56 | <i>Procecidocharis utilis</i>                                      | Tephritidae    |
| 57 | <i>Rhynocyllus conicus</i>                                         | Curculionidae  |
| 58 | <i>Rhyssomatus marginatus</i>                                      | Curculionidae  |
| 59 | <i>Sulcobruchus bakeri</i>                                         | Bruchidae      |
| 60 | <i>Teleonemia elata</i>                                            | Tingidae       |
| 61 | <i>Teleonemia scrupulosa</i>                                       | Tingidae       |
| 62 | <i>Trichapion lativentre</i>                                       | Apionidae      |
| 63 | <i>Trichilogaster xxx</i>                                          | Pteromalidae   |
| 64 | <i>Trichilogaster acaciaelongifoliae</i>                           | Pteromalidae   |
| 65 | <i>Tucumania tapiacola</i>                                         | Pyralidae      |
| 66 | <i>Urophora stylata</i>                                            | Tephritidae    |
| 67 | <i>Urophora stylata</i>                                            | Tephritidae    |
| 68 | <i>Uroplata fulvopustula</i>                                       | Chrysomelidae  |
| 69 | <i>Uroplata girardi</i>                                            | Chrysomelidae  |
| 70 | <i>Uroplata lantanae</i>                                           | Chrysomelidae  |

|                                                                                     |                                         |                   |
|-------------------------------------------------------------------------------------|-----------------------------------------|-------------------|
| 71                                                                                  | <i>Zeuxidiplosis giardi</i>             | Cecidomyiidae     |
| <b>Commercially available natural enemies for insect pest control</b>               |                                         |                   |
| <b>Insects</b>                                                                      |                                         |                   |
| 1                                                                                   | <i>Amblyseius californicus</i>          | Phytoseiidae      |
| 2                                                                                   | <i>Amblyseius cucumeris</i>             | Phytoseiidae      |
| 3                                                                                   | <i>Aphidius matricariae</i>             | Braconidae        |
| 4                                                                                   | <i>Aphytis linganensis</i>              | Aphelinidae       |
| 5                                                                                   | <i>Aphytis melinus</i>                  | Aphelinidae       |
| 6                                                                                   | <i>Apidoletes aphidimyza</i>            | Braconidae        |
| 7                                                                                   | <i>Chilocorus nigritus</i>              | Coccinellidae     |
| 8                                                                                   | <i>Coccidoxenoides peregrinus</i>       | Coccinellidae     |
| 9                                                                                   | <i>Cryptolaemus montrouzieri</i>        | Coccinellidae     |
| 10                                                                                  | <i>Cybocephalus binotatus</i>           | Coccinellidae     |
| 11                                                                                  | <i>Dacnusa sibirica</i>                 | Braconidae        |
| 12                                                                                  | <i>Diglyphus isae</i>                   | Braconidae        |
| 13                                                                                  | <i>Encarsia formosa</i>                 | Aphelinidae       |
| 14                                                                                  | <i>Nephus reunioni</i>                  | Coccinellidae     |
| 15                                                                                  | <i>Phytoseiulus persimilis</i>          | Phytoseiidae      |
| 16                                                                                  | <i>Trichogramma pretiosum</i>           | Trichogrammatidae |
| 17                                                                                  | <i>Trichogrammatoidea cryptophlebia</i> | Trichogrammatidae |
| <b>Nematodes</b>                                                                    |                                         |                   |
| 1                                                                                   | <i>Deladenus siricidicola</i>           |                   |
| 2                                                                                   | <i>Heterorhabdites megidis</i>          |                   |
| 3                                                                                   | <i>Heterorhabditis becteriophora</i>    |                   |
| 4                                                                                   | <i>Phasmarhabdites hermaphrodita</i>    |                   |
| 5                                                                                   | <i>Steinernema carpocaosae</i>          |                   |
| 6                                                                                   | <i>Steinernema feltiae</i>              |                   |
| 7                                                                                   | <i>Steinernema glaseri</i>              |                   |
| 8                                                                                   | <i>Steinernerma riobrave</i>            |                   |
| 9                                                                                   | <i>Steinernerma scapterisci</i>         |                   |
| <b>Introduced and established natural insect enemies against alien insect pests</b> |                                         |                   |
| 1                                                                                   | <i>Acerophagus notativentris</i>        | Encyrtidae        |
| 2                                                                                   | <i>Anagyrus bipunctata</i>              | Encyrtidae        |
| 3                                                                                   | <i>Anaphes nitens</i>                   | Mymaridae         |
| 4                                                                                   | <i>Apanteles subandinus</i>             | Braconidae        |
| 5                                                                                   | <i>Aphelinis asychis</i>                | Aphelinidae       |
| 6                                                                                   | <i>Aphelinus hordei</i>                 | Aphelinidae       |
| 7                                                                                   | <i>Aphelinus mali</i>                   | Aphelinidae       |
| 8                                                                                   | <i>Aphelinus varipes</i>                | Aphelinidae       |
| 9                                                                                   | <i>Aphidius matricariae</i>             | Braconidae        |
| 10                                                                                  | <i>Aphytis chionaspis</i>               | Aphelinidae       |
| 11                                                                                  | <i>Aphytis chrysomphali</i>             | Aphelinidae       |
| 12                                                                                  | <i>Aphytis coheni</i>                   | Aphelinidae       |
| 13                                                                                  | <i>Aphytis holoxanthus</i>              | Aphelinidae       |
| 14                                                                                  | <i>Aphytis lepidosaphes</i>             | Aphelinidae       |
| 15                                                                                  | <i>Aphytis linganensis</i>              | Aphelinidae       |
| 16                                                                                  | <i>Aphytis melinus</i>                  | Aphelinidae       |
| 17                                                                                  | <i>Ascogaster quadridentata</i>         | Braconidae        |
| 18                                                                                  | <i>Avetianella longoi</i>               | Encyrtidae        |
| 19                                                                                  | <i>Bdellodes lapidaria</i>              | Ibaliidae         |
| 20                                                                                  | <i>Chilocorus cacti</i>                 | Coccinellidae     |
| 21                                                                                  | <i>Coccophagus gurneui</i>              | Aphelinidae       |
| 22                                                                                  | <i>Comperiella bifasciata</i>           | Encyrtidae        |
| 23                                                                                  | <i>Copidosoma koehleri</i>              | Encyrtidae        |
| 24                                                                                  | <i>Cryptolaemus montrouzieri</i>        | Coccinellidae     |
| 25                                                                                  | <i>Dendrosoter caenopachoides</i>       | Braconidae        |
| 26                                                                                  | <i>Encarsia cf. smithii</i>             | Aphelinidae       |
| 27                                                                                  | <i>Ennogera politica</i>                | Pteromalidae      |
| 28                                                                                  | <i>Ennogera reticulate</i>              | Pteromalidae      |
| 29                                                                                  | <i>Eretmocereus serius</i>              | Aphelinidae       |
| 28                                                                                  | <i>Ibalia leucospoides</i>              | Ibaliidae         |
| 29                                                                                  | <i>Jarra phoracanthae</i>               | Braconidae        |
| 30                                                                                  | <i>Pauesia cinarivora</i>               | Braconidae        |
| 31                                                                                  | <i>Rodolia cardinalis</i>               | Coccinellidae     |
| 32                                                                                  | <i>Syngaster lepidus</i>                | Braconidae        |
| 33                                                                                  | <i>Trisolcus basalis</i>                | Scelionidae       |

## 2.9 Plants

| Species                 |                                                                     | Common name                                                                                     |
|-------------------------|---------------------------------------------------------------------|-------------------------------------------------------------------------------------------------|
| <b>Cultivated crops</b> |                                                                     |                                                                                                 |
| 1.                      | <i>Aliem cepa</i>                                                   | Union                                                                                           |
| 2.                      | <i>Alium porrum</i>                                                 | Leek                                                                                            |
| 3.                      | <i>Antheophora pubescens</i>                                        | Bottle brush grass                                                                              |
| 4.                      | <i>Arachis hypogaeae</i>                                            | Groundnut                                                                                       |
| 5.                      | <i>Asparagus officinalis</i>                                        | Asparagus                                                                                       |
| 6.                      | <i>Avena nuda</i>                                                   | Naked oats                                                                                      |
| 7.                      | <i>Avena sativa (A.byzantina)</i>                                   | Oats                                                                                            |
| 8.                      | <i>Beta vulgaris</i> (and varieties)                                | Fodder/garden bee, Swiss chardt                                                                 |
| 9.                      | <i>Brassica napus</i> (and var. <i>napobrassica</i> )               | Forage rape                                                                                     |
| 10.                     | <i>Brassica oleraceae</i> (and varieties)                           | Fodder kal,kohlrabi, curly cale, cauliflower, broccoli, cabbage, savoy cabbage, brussel sprouts |
| 11.                     | <i>Brassica rapa (B. chinensis, B. campestris and B.pekinensis)</i> | Turnip                                                                                          |
| 12.                     | <i>Bromus catharticus</i>                                           | Rescue grass                                                                                    |
| 13.                     | <i>Capsicum sp.</i>                                                 | Peppers, paprika                                                                                |
| 14.                     | <i>Cenchrus ciliaris</i>                                            | Blue buffalo grass                                                                              |
| 15.                     | <i>Chloris gayana</i>                                               | Rhodes grass                                                                                    |
| 16.                     | <i>Citrullus lanatus</i>                                            | Watermelon                                                                                      |
| 17.                     | <i>Cucumis melo</i>                                                 | Sweet melon                                                                                     |
| 18.                     | <i>Cucumis sativus</i>                                              | Cucumber                                                                                        |
| 19.                     | <i>Cucurbita maxima</i>                                             | Pumkin, squash                                                                                  |
| 20.                     | <i>Cucurbita moschata</i>                                           | Pumkin, squash                                                                                  |
| 21.                     | <i>Cucurbita pepo</i>                                               | Squash                                                                                          |
| 22.                     | <i>Cydonia sp.</i>                                                  | Quince                                                                                          |
| 23.                     | <i>Dactylis glomerata</i>                                           | Cocksfoot                                                                                       |
| 24.                     | <i>Daucus carota</i>                                                | Carrot                                                                                          |
| 25.                     | <i>Desmodium intortum</i>                                           | Green leaf desmodium                                                                            |
| 26.                     | <i>Desmodium uncinatum</i>                                          | Silver leaf desmodium                                                                           |
| 27.                     | <i>Digitaria smutsii</i>                                            | Smuts finger grass                                                                              |
| 28.                     | <i>Eragrostis curvula</i>                                           | Weeping lovegrass                                                                               |
| 29.                     | <i>Eragrostis tef</i>                                               | Teff                                                                                            |
| 30.                     | <i>Festuca arundinaceae</i>                                         | Teff fescue                                                                                     |
| 31.                     | <i>Fragaria x ananassa</i>                                          | Strawberry                                                                                      |
| 32.                     | <i>Glycine max</i>                                                  | Soya bean                                                                                       |
| 33.                     | <i>Gossypium hirsutum</i>                                           | Cotton                                                                                          |
| 34.                     | <i>Helianthus anuus</i>                                             | Sunflower                                                                                       |
| 35.                     | <i>Hordeum vulgare</i>                                              | Barley                                                                                          |
| 36.                     | <i>Lactuca sativa</i>                                               | Lettuce                                                                                         |
| 37.                     | <i>Lespedeza cuneata</i>                                            | Lespedeza                                                                                       |
| 38.                     | <i>Lespedeza striata</i>                                            | Lespedeza                                                                                       |
| 39.                     | <i>Lolium x boucheanum</i>                                          | Hybrid ryegrass                                                                                 |
| 40.                     | <i>Lolium multiflorum</i>                                           | Italian and westerworld ryegrass                                                                |
| 41.                     | <i>Lolium perenne</i>                                               | Perennial ryegrass                                                                              |
| 42.                     | <i>Lolium rigidum</i>                                               | Annual ryegrass                                                                                 |
| 43.                     | <i>Lotus corniculatus</i>                                           | Bird's foot trefoil                                                                             |
| 44.                     | <i>Lupinus albus</i>                                                | White lupin                                                                                     |
| 45.                     | <i>Lupinus angustifolius</i>                                        | Narrow leaf lupin                                                                               |
| 46.                     | <i>Lupinus luteus</i>                                               | Yellow lupin                                                                                    |
| 47.                     | <i>Lycopersicon esculentum</i>                                      | Tomato                                                                                          |
| 48.                     | <i>Malus spp</i>                                                    | Apple                                                                                           |
| 49.                     | <i>Medicago littoralis</i>                                          | Strand medic                                                                                    |
| 50.                     | <i>Medicago polymorpha</i>                                          | Burr medic                                                                                      |
| 51.                     | <i>Medicago rugosa</i>                                              | Gama medic                                                                                      |
| 52.                     | <i>Medicago sativa (M. varia)</i>                                   | Lucerne                                                                                         |
| 53.                     | <i>Medicago scutellata</i>                                          | Snail medic                                                                                     |
| 54.                     | <i>Nicoteana tabacum</i>                                            | Tobacco                                                                                         |
| 55.                     | <i>Ornithopus compressus</i>                                        | Yellow serradella                                                                               |
| 56.                     | <i>Ornithopus sativus</i>                                           | Serradella                                                                                      |
| 57.                     | <i>Oryza sativa</i>                                                 | Rice                                                                                            |
| 58.                     | <i>Panicum maximum</i>                                              | White buffalo grass                                                                             |
| 59.                     | <i>Paspalum dilatatum</i>                                           | Dallis grass                                                                                    |
| 60.                     | <i>Pastinaca sativa</i>                                             | Parsnip                                                                                         |
| 61.                     | <i>Pennisetum clandestinum</i>                                      | Kikuyu                                                                                          |
| 62.                     | <i>Pennisetum glaucum</i>                                           | Pearl millet                                                                                    |
| 63.                     | <i>Petroselinum crispum</i>                                         | Parsley                                                                                         |
| 64.                     | <i>Phalaris aquatica</i>                                            | Phalaris                                                                                        |
| 65.                     | <i>Phaseolus coccineus</i>                                          | Kidney bean                                                                                     |
| 66.                     | <i>Phaseolus vulgaris</i>                                           | Dry bean, garden bean                                                                           |
| 67.                     | <i>Pisum sativum</i>                                                | Dry pea, garden pea                                                                             |
| 68.                     | <i>Prunus amygdalus</i>                                             |                                                                                                 |



|                                   |                                       |                                   |
|-----------------------------------|---------------------------------------|-----------------------------------|
| 69.                               | <i>Prunus dulcis</i>                  | Almond                            |
| 70.                               | <i>Prunus armeniaca</i>               | Apricot                           |
| 71.                               | <i>Prunus avium</i>                   | Sweet cherry                      |
| 72.                               | <i>Prunus cerasus</i>                 | Sour cherry                       |
| 73.                               | <i>Prunus domestica</i>               | Plum                              |
| 74.                               | <i>Prunus persica and varieties</i>   | Peach, nectarine                  |
| 75.                               | <i>Prunus salicina</i>                | Japanese plum                     |
| 76.                               | <i>Pyrus sp.</i>                      | Pear                              |
| 77.                               | <i>Raphanus sativus</i> and varieties | Fodder and garden radish          |
| 78.                               | <i>Ricinus communis</i>               | Castor bean (castor oil plant)    |
| 79.                               | <i>Secale cereale</i>                 | Rye                               |
| 80.                               | <i>Setaria sphacelata</i>             | Common setaria                    |
| 81.                               | <i>Sinapsis alba</i>                  | White mustard                     |
| 82.                               | <i>Solanum melongena</i>              | Eggplant                          |
| 83.                               | <i>Solanum tuberosum</i>              | Potato                            |
| 84.                               | <i>Sorghum bicolor</i>                | Grain sorghum                     |
| 85.                               | <i>Sorghum almum</i>                  | Forage sorghum                    |
| 86.                               | <i>Sorghum sudanense</i>              | Forage sorghum                    |
| 87.                               | <i>Stylosanthes hamate</i>            | Caribbean stylo                   |
| 88.                               | <i>Trifolium fragiferum</i>           | Strawberry clover                 |
| 89.                               | <i>Trifolium hirtum</i>               | Rose clover                       |
| 90.                               | <i>Trifolium incarnatum</i>           | Crimson clover                    |
| 91.                               | <i>Trifolium pratense</i>             | Red clover                        |
| 92.                               | <i>Trifolium repens</i>               | White clover                      |
| 93.                               | <i>Trifolium resupinatum</i>          | Persian clover                    |
| 94.                               | <i>Trifolium subterraneum</i>         | Subterranean clover               |
| 95.                               | <i>Trifolium vesiculosum</i>          | Arrow leaf clover                 |
| 96.                               | <i>Triticum x secale</i>              | Triticale                         |
| 97.                               | <i>Triticum aestivum</i>              | Wheat                             |
| 98.                               | <i>Triticum durum</i>                 | Durum wheat                       |
| 99.                               | <i>Vicia faba</i>                     | Broad bean                        |
| 100.                              | <i>Vicia sativa</i>                   | Common vetch                      |
| 101.                              | <i>Vicia villosa</i>                  | Hairy vetch                       |
| 102.                              | <i>Vigna unguiculata</i>              | Cowpea                            |
| 103.                              | <i>Vitis sp</i>                       | Grape                             |
| 104.                              | <i>Zea mays</i>                       | White and yellow maize, sweetcorn |
| <b>Ornamental plants</b>          |                                       |                                   |
| These are still under discussion. |                                       |                                   |

## 2.10 Microbes

| No                   | Species                                              | Benefit                                 |
|----------------------|------------------------------------------------------|-----------------------------------------|
| <b>Bacteria</b>      |                                                      |                                         |
| 1                    | <i>Agrobacterium radiobacter</i>                     | Biocontrol crown gall                   |
| 2                    | <i>Azospirillum brasilense</i>                       | Plant growth stimulant                  |
| 3                    | <i>Azospirillum lipoferum</i>                        | Plant growth stimulant                  |
| 4                    | <i>Bacillus licheniformis</i> (Bacterium)            | Foliar and soil fungal pathogen control |
| 5                    | <i>Bacillus pumillus</i> (Bacterium)                 | As above                                |
| 6                    | <i>Bacillus sphaericus</i> (Bacillaceae)             | Insect pest control                     |
| 7                    | <i>Bacillus subtilis</i> (Bacterium)                 | Biocontrol soil fungal pathogens        |
| 8                    | <i>Bacillus thuringiensis</i> (Bacillaceae)          | Insect pest control                     |
| 9                    | <i>Paenibacillus popilliae</i> (Paenibacillaceae)    | Insect pest control                     |
| 10                   | <i>Rhizobium lophantae</i>                           |                                         |
| 11                   | <i>Serratia entomophila</i> (Enterobacteriaceae)     | Biocontrol insect pests                 |
| <b>Fungi</b>         |                                                      |                                         |
| 1                    | <i>Beauveria bassiana</i> (Deuteromycetes)           | Biocontrol insect pests                 |
| 2                    | <i>Beauveria brongniartii</i> (Deuteromycetes)       | Biocontrol insect pests                 |
| 3                    | <i>Cryptococcus albidus</i> (Hyphomycetes)           | Biocontrol of pathogens                 |
| 4                    | <i>Entyloma ageratinae</i> (Basidiomycetes)          | Biocontrol of Ageratina                 |
| 5                    | <i>Lagenidium giganteum</i> (Oomycetes)              | Biocontrol insect pests                 |
| 6                    | <i>Lecanicillium lecanii</i> (Deuteromycetes)        | Biocontrol insect pests                 |
| 7                    | <i>Metarhizium anisoplae</i> (Hyphomycetes)          | Biocontrol of locusts                   |
| 8                    | <i>Mycovellosiella lantanae</i> var. <i>lantanae</i> | Biocontrol of Lantana                   |
| 9                    | <i>Paecilomyces lilacinus</i> (Hyphomycetes)         | Biocontrol nematodes                    |
| 10                   | <i>Paecilomyces fumosoroseus</i> (Hyphomycetes)      | Biocontrol nematodes                    |
| 11                   | <i>Pandora neoaphidis</i> (Hyphomycetes)             | Biocontrol of aphids                    |
| 12                   | <i>Trichoderma harzianum</i>                         | Biocontrol of pathogens                 |
| 13                   | <i>Trichoderma koningii</i>                          | Biocontrol of pathogens                 |
| 14                   | <i>Trichoderma viridae</i>                           | Biocontrol of pathogens                 |
| 15                   | <i>Uromyces tepperianum</i> (Basidiomycetes)         | Biocontrol of <i>Acacia saligna</i>     |
| 16                   | <i>Verticillium chlamydosporium</i> (Hyphomycetes)   | Biocontrol nematodes                    |
| 17                   | <i>Zoophthora radicans</i> (Entomophthoraceae)       | Biocontrol insects                      |
| <b>Microsporidia</b> |                                                      |                                         |

|   |                                                                        |                            |
|---|------------------------------------------------------------------------|----------------------------|
| 1 | <i>Nosema locustae</i> (Nosematidae)                                   | Biocontrol of locusts      |
| 2 | <i>Varimorpha necatrix</i> (Burenellidae)                              |                            |
|   | <b>Viruses</b>                                                         |                            |
| 1 | <i>Cydia pomonella</i> granulosus virus (CpGV)                         | Biocontrol of codling moth |
| 2 | <i>Helicoverpa armigera</i> Nucleopolyhedrovirus (SeNVP) Baculoviridae | Biocontrol of stalk borer  |
| 3 | <i>Spodoptera exigua</i> (Nucleopolyhedrovirus) (SeNVP) Baculoviridae  | Biocontrol of armyworm     |

## Appendix 3

### Species Listed as Invasive Species

1. The species are listed alphabetically by scientific name for each of the following groupings:
  - 3.1 Mammals
  - 3.2 Birds
  - 3.3 Reptiles
  - 3.4 Amphibians
  - 3.5 Fishes (Fresh-Water)
  - 3.6 Fishes (Marine) and Other Marine Species
  - 3.7 Invertebrates (Fresh-water)
  - 3.7 Invertebrates (Terrestrial)
  - 3.9 Plants
  - 3.10 Microbes
2. The following categories of invasive species are provided for in terms of the Regulations:
  - Category 1a:** Prohibited Invasive Species
  - Category 1b:** Invasive Species Controlled by Programme
  - Category 2:** Invasive Species Controlled by Area
  - Category 3:** Invasive Species Controlled by Activity
  - Category 4:** Extra-Limital Species
  - Category 5:** Species Under Surveillance
3. The conditions set out in the Regulations, and in Schedule 3 to the Regulations, apply to the regulation of the species listed in these six categories.
4. Category 4 species are only considered invasive outside of the area deemed as part of the distribution range of a species indigenous to South Africa.
5. Category 5 species are potentially invasive species, or invasive species where the benefits of controlling them are to be weighed up against the costs of doing so.
6. The maps showing the deemed natural distribution ranges for the extra-limital species (Category 2) can be found in Schedule 3 to the Regulations.
7. The lists will be consolidated over the next two years, and updated on a regular basis.

**3.1 Mammals**

| No | Species                                                                                          | Common Name                      | Category         |
|----|--------------------------------------------------------------------------------------------------|----------------------------------|------------------|
| 1  | <i>Addax nasomaculatus</i>                                                                       | Addax                            | 2                |
| 2  | <i>Aepyceros melampus melampus</i>                                                               | Impala                           | 4 (Map)          |
| 3  | <i>Aepyceros melampus petersi</i>                                                                | Black-faced impala               | 2                |
| 4  | <i>Alcelaphus lichtensteinii</i>                                                                 | Lichtenstein's hartebeest        | 2                |
| 5  | <i>Ammotragus lervia</i>                                                                         | Barbary sheep                    | 2                |
| 6  | <i>Antilope cervicapra</i>                                                                       | Indian blackbuck                 | 2                |
| 7  | <i>Axis axis</i>                                                                                 | Axis deer (Chital)               | 2                |
| 8  | <i>Axis porcinus</i>                                                                             | Hog deer                         | 2                |
| 9  | <i>Boselaphus tragocamelus</i>                                                                   | Nilgai                           | 2                |
| 10 | <i>Capra hircus</i>                                                                              | Feral goat                       | 1b - for islands |
| 11 | <i>Cephalophus natalensis</i>                                                                    | Red duiker                       | 4 (Map)          |
| 12 | <i>Cercopithecus mitis</i>                                                                       | Samango monkey                   | 4 (Map)          |
| 13 | <i>Cervus elaphus</i>                                                                            | Red deer                         | 2                |
| 14 | <i>Cervus nippon</i>                                                                             | Sika deer                        | 2                |
| 15 | <i>Chlorocebus aethiops</i>                                                                      | Vervet monkey                    | 4 (Map)          |
| 16 | <i>Connochaetes gnou</i>                                                                         | Black wildebeest                 | 4 (Map)          |
| 17 | <i>Connochaetes gnou x taurinus taurinus</i>                                                     | Hybrid (black / blue wildebeest) | 1a               |
| 18 | <i>Connochaetes taurinus taurinus</i>                                                            | Blue wildebeest                  | 4 (Map)          |
| 19 | <i>Dama dama</i>                                                                                 | Fallow deer                      | 2                |
| 20 | <i>Damaliscus pygargus phillipsi</i><br><i>Damaliscus pygargus phillipsi x pygargus pygargus</i> | Blesbok                          | 4 (Map)          |
| 21 | <i>Damaliscus pygargus phillipsi</i><br><i>Damaliscus pygargus phillipsi x pygargus pygargus</i> | Hybrid (blesbok / bontebok)      | 1a               |
| 22 | <i>Damaliscus pygargus pygargus</i>                                                              | Bontebok                         | 4 (Map)          |
| 23 | <i>Diceros bicornis</i>                                                                          | Black south-western rhinoceros   | 4 (Map)          |
| 24 | <i>Diceros bicornis michaeli</i>                                                                 | Black Kenya rhinoceros           | 2                |
| 25 | <i>Diceros bicornis minor</i>                                                                    | Black south-central rhinoceros   | 4 (Map)          |
| 26 | <i>Elaphurus davidianus</i>                                                                      | Pere David's deer                | 2                |
| 27 | <i>Equus zebra hartmannae</i>                                                                    | Hartmann's mountain zebra        | 4 (Map)          |
| 28 | <i>Equus zebra zebra</i>                                                                         | Cape mountain zebra              | 4 (Map)          |
| 29 | <i>Felis catus</i>                                                                               | Domestic cat                     | 1b on island     |
| 30 | <i>Giraffa camelopardalis giraffa</i>                                                            | Giraffe                          | 4 (Map)          |
| 31 | <i>Hemitragus jemlahicus</i>                                                                     | Himalayan tahr                   | 1b               |
| 32 | <i>Hippotragus koba</i>                                                                          | Western roan                     | 2                |
| 33 | <i>Hydrochaeris hydrochaeris</i>                                                                 | Cappibara                        | 3                |
| 34 | <i>Kobus ellipsiprymnus crawshayi</i>                                                            | Crawshay's waterbuck (Zambia)    | 2                |
| 35 | <i>Kobus ellipsiprymnus defassa</i>                                                              | Defassa waterbuck (Kenya)        | 3                |
| 36 | <i>Kobus leche</i>                                                                               | Red lechwe                       | 2                |
| 37 | <i>Kobus vardonii</i>                                                                            | Puku                             | 2                |
| 38 | <i>Mus musculus</i>                                                                              | House mouse                      | 1b on islands    |
| 39 | <i>Myocastor coypus</i>                                                                          | Coypu                            | 3                |
| 40 | <i>Neotragus moschatus zuluensis</i>                                                             | Suni                             | 4 (Map)          |
| 41 | <i>Oreotragus oreotragus</i>                                                                     | Klipspringer                     | 4 (Map)          |
| 42 | <i>Oryctolagus cuniculus</i>                                                                     | European rabbit                  | 1b on islands    |
| 43 | <i>Oryx dammah</i>                                                                               | Scimitar-horned oryx             | 2                |
| 44 | <i>Ourebia ourebi</i>                                                                            | Oribi                            | 4 (Map)          |
| 45 | <i>Ovis musimon</i>                                                                              | Mouflon                          | 2                |
| 46 | <i>Panthera pardus melanotica</i>                                                                | Leopard                          | 5                |
| 47 | <i>Papio cynocephalus</i>                                                                        | Baboon                           | 5                |
| 48 | <i>Papio ursinus</i>                                                                             | Baboon                           | 4 (Map)          |
| 49 | <i>Pelea capreolus</i>                                                                           | Grey rhebok                      | 4 (Map)          |
| 50 | <i>Phacochoerus africanus</i>                                                                    | Warthog                          | 4 (Map)          |
| 51 | <i>Philantomba monticola</i>                                                                     | Blue duiker                      | 4 (Map)          |
| 52 | <i>Potamochoerus larvatus koiropotamus</i>                                                       | Bushpig                          | 4 (Map)          |
| 53 | <i>Raphicerus campestris</i>                                                                     | Steenbok                         | 4 (Map)          |

|    |                                    |                     |                |
|----|------------------------------------|---------------------|----------------|
| 54 | <i>Raphicerus melanotis</i>        | Cape grysbok        | 4 (Map)        |
| 55 | <i>Raphicerus sharpei</i>          | Sharpe's grysbok    | 4 (Map)        |
| 56 | <i>Rattus norvegicus</i>           | Brown rat           | 1b for islands |
| 57 | <i>Rattus rattus</i>               | House rat           | 1b for islands |
| 58 | <i>Redunca arundinum arundinum</i> | Southern reedbuck   | 4 (Map)        |
| 59 | <i>Redunca fulvorufula</i>         | Mountain reedbuck   | 4 (Map)        |
| 60 | <i>Rusa unicolor</i>               | Sambar deer         | 2              |
| 61 | <i>Sciurus carolinensis</i>        | Grey squirrel       | 5              |
| 62 | <i>Silvicapra grimmia</i>          | Gray Duiker         | 4 (Map)        |
| 63 | <i>Sus scrofa</i>                  | Feral pig           | 1b             |
| 64 | <i>Tragelaphus derbianus</i>       | Derby eland         | 3              |
| 65 | <i>Tragelaphus angasii</i>         | Nyala               | 4 (Map)        |
| 66 | <i>Tragelaphus scriptus</i>        | Bushbuck            | 4 (Map)        |
| 67 | <i>Tragelaphus spekii</i>          | Sitatunga           | 2              |
| 68 | <i>Tragelaphus livingstonii</i>    | Livingstone's eland | 2              |

### 3.2 Birds

| No | Species                          | Common Name                        | Category                     |
|----|----------------------------------|------------------------------------|------------------------------|
| 1  | <i>Acridotheres tristis</i>      | Indian myna                        | 2                            |
| 2  | <i>Alectoris chukar</i>          | Chukar partridge                   | 2 on mainland; 1b on islands |
| 3  | <i>Alopochen aegyptiacus</i>     | Egyptian goose                     | 5                            |
| 4  | <i>Anas platyrhynchos</i>        | Mallard duck                       | 1b                           |
| 5  | <i>Corvus splendens</i>          | Indian house crow                  | 1b                           |
| 6  | <i>Cygnus olor</i>               | Mute swan                          | 5                            |
| 7  | <i>Fringilla coelebs</i>         | Chaffinch                          | 5                            |
| 8  | <i>Numida meleagris coronata</i> | Helmeted guineafowl (Eastern Cape) | 4 (Map)                      |
| 9  | <i>Numida meleagris galeata</i>  | Helmeted guineafowl (West African) | 3                            |
| 10 | <i>Oxyura leucocephala</i>       | White-headed duck                  | 5                            |
| 11 | <i>Passer domesticus</i>         | House sparrow House                | 5                            |
| 12 | <i>Pavo cristatus</i>            | Peacock                            | 5                            |
| 13 | <i>Psittacula cyanocephala</i>   | Plumheaded parakeet                | 5                            |
| 14 | <i>Psittacula krameri</i>        | Rose-ringed parakeet               | 5                            |
| 15 | <i>Sturnus vulgaris</i>          | Eurasian starling                  | 2                            |

### 3.3 Reptiles

| No | Species                          | Common Name                | Category     |
|----|----------------------------------|----------------------------|--------------|
| 1  | <i>Acanthophis antarcticus</i>   | Grey death adder           | 5            |
| 2  | <i>Acanthophis pyrrhus</i>       | Desert death adder         | 5            |
| 3  | <i>Afroedura pondolia</i>        | Pondola fat-tailed gheko   | 5            |
| 4  | <i>Afrogecko porphyreus</i>      | Marbled gheko              | 5 on islands |
| 5  | <i>Agkistrodon contortrix</i>    | Copperhead                 | 5            |
| 6  | <i>Agkistrodon piscivorous</i>   | Cottonmouth                | 5            |
| 7  | <i>Agkistrodon contortrix</i>    | Copperhead                 | 5            |
| 8  | <i>Agkistrodon piscivorus</i>    | Water/cottonmouth moccasin | 5            |
| 9  | <i>Aspidelaps cowlesi</i>        | Angolan coral snake        | 5            |
| 10 | <i>Aspidelaps fulafula</i>       | Eastern shieldnose         | 5            |
| 11 | <i>Bitis gabonica rhinoceros</i> | West African gaboon viper  | 5            |
| 12 | <i>Bogertophis subocularis</i>   | Ratsnake transpecos        | 5            |
| 13 | <i>Bradypodion damaranum</i>     | Knysna dwarf chameleon     | 5            |
| 14 | <i>Cerastes cerastes</i>         | Desert horned viper        | 5            |
| 15 | <i>Chalcides guentheri</i>       | Gunthers skink             | 5            |
| 16 | <i>Chalcides ocellatus</i>       | Ocellated skink            | 5            |

|    |                                                        |                                     |    |
|----|--------------------------------------------------------|-------------------------------------|----|
| 17 | <i>Chameleo calypratus</i>                             | Yemen chameleon                     | 5  |
| 18 | <i>Charina bottae</i>                                  | Rubber boa                          | 5  |
| 19 | <i>Charina trivirgata</i>                              | Rosy boa                            | 5  |
| 20 | <i>Chelydra serpentina</i>                             | Common snapper turtle               | 1a |
| 21 | <i>Chlamydosaurus kingii</i>                           | Frilled lizard                      | 5  |
| 22 | <i>Coluber hippocrepis</i>                             | Whip snake                          | 5  |
| 23 | <i>Crotalus atrox</i>                                  | Western diamond-backed rattler      | 5  |
| 24 | <i>Crotalus horridus</i>                               | Canebrake timber/rattlesnake        | 5  |
| 25 | <i>Crotalus scutulatus</i>                             | Mojave rattlesnake                  | 5  |
| 26 | <i>Crotalus viridis</i>                                | Prairie rattlesnake                 | 5  |
| 27 | <i>Crotaphytus collaris</i>                            | Collared lizard                     | 5  |
| 28 | <i>Cyrtopodion caspius</i>                             | Caspian gecko                       | 5  |
| 29 | <i>Cyrtopodion kotschy</i>                             | Kotchys gecko                       | 5  |
| 30 | <i>Daboia russelli</i>                                 | Russels viper                       | 5  |
| 31 | <i>Drymarchon corais</i>                               | Cribo                               | 5  |
| 32 | <i>Drymarchon couperi</i>                              | Indigo snake                        | 5  |
| 33 | <i>Echis carinatus</i>                                 | Saw scaled viper                    | 5  |
| 34 | <i>Echis coloratus</i>                                 | Carpet viper                        | 5  |
| 35 | <i>Egernia cunninghami</i>                             | Cunninghams skink                   | 5  |
| 36 | <i>Elaphe bairdi</i>                                   | Bairds ratsnake                     | 5  |
| 37 | <i>Elaphe dione</i>                                    | Diones ratsnake                     | 5  |
| 38 | <i>Elaphe emoryi</i>                                   | Great plains ratsnake               | 5  |
| 39 | <i>Elaphe guttata</i>                                  | Corn snake                          | 5  |
| 40 | <i>Elaphe helena</i>                                   | Trinket ratsnake                    | 5  |
| 41 | <i>Elaphe obsoleta</i>                                 | American ratsnake                   | 5  |
| 42 | <i>Elaphe quatuorlineata</i>                           | European ratsnake                   | 5  |
| 43 | <i>Eryx colubrinus</i>                                 | Kenyan sandboa                      | 5  |
| 44 | <i>Eryx conicus</i>                                    | Rough scaled sandboa                | 5  |
| 45 | <i>Eryx miliaris</i>                                   | Military sandboa                    | 5  |
| 46 | <i>Eryx tataricus</i>                                  | Russian sandboa                     | 5  |
| 47 | <i>Eublepharis macularius</i>                          | Leopard gecko                       | 5  |
| 48 | <i>Eumeces callicephalus</i>                           | Mountain skink                      | 5  |
| 49 | <i>Eumeces egregious</i>                               | Royal skink                         | 5  |
| 50 | <i>Eumeces elegans</i>                                 | Five lined skink                    | 5  |
| 51 | <i>Gekko gekko</i>                                     | Tokay gecko                         | 3  |
| 52 | <i>Geochelone sulcata</i>                              | African spur-thighed tortoise       | 5  |
| 53 | <i>Heterodon nasicus</i>                               | Western hognose snake               | 5  |
| 54 | <i>Hemidactylus cf. mabouia</i>                        | Tropical house gecko                | 5  |
| 55 | <i>Iguana iguana</i>                                   | Green iguana                        | 3  |
| 56 | <i>Lacerta viridis</i>                                 | Green wall lizard                   | 5  |
| 57 | <i>Lampropeltis spp</i>                                | Kingsnakes                          | 5  |
| 58 | <i>Getulus (ssp. californiae, nigrilus, splendida)</i> | Californian/Mxican/desert kingsnake | 5  |
| 59 | <i>Lampropeltis mexicana (ssp. alterna)</i>            | Gray-banded kingsnake               | 5  |
| 60 | <i>Lampropeltis pyromelana</i>                         | Arizona mountain kingsnake          | 5  |
| 61 | <i>Lampropeltis triangulum</i>                         | Mexican milk snake                  | 5  |
| 62 | <i>Lamprophis (Boaedon) lineatus</i>                   | Lined house snake                   | 5  |
| 63 | <i>Lamprophis (Boaedon) olivaceus</i>                  | Olive house snake                   | 5  |
| 64 | <i>Leioheterodon geayi</i>                             | Speckled hognosed snake             | 5  |
| 65 | <i>Leioheterodon madagascariensis</i>                  | Giant hognosed snake                | 5  |
| 66 | <i>Leioheterodon modestus</i>                          | Blond hognosed snake                | 5  |
| 67 | <i>Lepidodactylus lugubris</i>                         | Mourning gecko                      | 5  |
| 68 | <i>Macrovipera deserti</i>                             | Desert viper                        | 5  |
| 69 | <i>Macrovipera lebetina</i>                            | Levant viper                        | 5  |
| 70 | <i>Naja nigricincta</i>                                | Western barred cobra                | 5  |
| 71 | <i>Naja pallida</i>                                    | Red spitting cobra                  | 5  |
| 72 | <i>Natrix maura</i>                                    | Checkered grass snake               | 5  |

|     |                                    |                              |    |
|-----|------------------------------------|------------------------------|----|
| 73  | <i>Natrix natrix</i>               | European grass snake         | 5  |
| 74  | <i>Ophisaurus apodus</i>           | European legless lizard      | 5  |
| 75  | <i>Uromastix aegypticus</i>        | Egyptian spiny-tailed lizard | 5  |
| 76  | <i>Phelsuma lineata</i>            | Lined day gecko              | 5  |
| 77  | <i>Phelsuma madagascariensis</i>   | Giant day gecko              | 5  |
| 78  | <i>Phelsuma standingi</i>          | Yellow spotted day gecko     | 5  |
| 79  | <i>Physignathus cocincinus</i>     | Chinese water dragon         | 5  |
| 80  | <i>Physignathus lesueurii</i>      | Australian water dragon      | 5  |
| 81  | <i>Pituophis catenifer</i>         | Pine and gopher snakes       | 5  |
| 82  | <i>Pituophis melanoleucus</i>      | Bullsnake                    | 5  |
| 83  | <i>Pogona barbata</i>              | Bearded dragon               | 5  |
| 84  | <i>Pogona vitticeps</i>            | Inland bearded dragon        | 5  |
| 85  | <i>Pseudocerastes fieldi</i>       | False horned viper           | 5  |
| 86  | <i>Ptyas mucosus</i>               | Indian ratsnake              | 5  |
| 87  | <i>Rankinia adelaidensis</i>       | Jacky dragon                 | 5  |
| 88  | <i>Rankinia diemensis</i>          | Mountain dragon              | 5  |
| 89  | <i>Rhinotyphlops</i>               | Spp                          | 1a |
| 90  | <i>Sistrurus catenatus</i>         | Massasauga                   | 5  |
| 91  | <i>Sistrurus miliarius</i>         | Pigmy rattlesnake            | 5  |
| 92  | <i>Sistrurus ravus</i>             | Mexican pigmy rattlesnake    | 5  |
| 93  | <i>Spalaerosophis diadema</i>      | Diadem ratsnake              | 5  |
| 94  | <i>Teratolepis fasciata</i>        | Viper gecko                  | 5  |
| 95  | <i>Thamnophis marcianus</i>        | Chequered garter snake       | 5  |
| 96  | <i>Trachemys scripta elegans</i>   | Red-eared slider             | 1a |
| 97  | <i>Thamnophis sirtalis</i>         | Common garter snake          | 5  |
| 98  | <i>Trachydosaurus rugosa</i>       | Pine cone skink              | 5  |
| 99  | <i>Tupinambis merianae</i>         | Argentine tegu               | 5  |
| 100 | <i>Tupinambis rufescens</i>        | Red tegu                     | 5  |
| 101 | <i>Tympanocryptis cephalus</i>     | Earless dragon               | 5  |
| 102 | <i>Tympanocryptis lineata</i>      | Striped dragon               | 5  |
| 103 | <i>Uromastix acanthinura</i>       | North African dab lizard     | 5  |
| 104 | <i>Uromastix gehri</i>             | Nigerian dab lizard          | 5  |
| 105 | <i>Uromastix malienis</i>          | Mali dab lizard              | 5  |
| 106 | <i>Uromastix ocellata</i>          | Spotted dab lizard           | 5  |
| 107 | <i>Uromastix ornata</i>            | Egyptian dab lizard          | 5  |
| 108 | <i>Varanus acanthurus</i>          | Ridge tailed monitor         | 5  |
| 109 | <i>Varanus bengalensis</i>         | Bengal monitor               | 5  |
| 110 | <i>Varanus gouldii</i>             | Goulds monitor               | 5  |
| 111 | <i>Vipera ammodytes</i>            | Long nose viper              | 5  |
| 112 | <i>Vipera berus</i>                | European adder               | 5  |
| 113 | <i>Vipera kaznakovi</i>            | Russian adder                | 5  |
| 114 | <i>Vipera palaestinae</i>          | Palestine viper              | 5  |
| 115 | <i>Vipera raddei</i>               | Radds viper                  | 5  |
| 116 | <i>Vipera xanthina</i>             | Ottomans viper               | 5  |
| 117 | <i>Zonosaurus madagascariensis</i> | Madagascan plated lizard     | 5  |
| 118 | <i>Zonosaurus ornatus</i>          | Ornate plated lizard         | 5  |
| 119 | <i>Zonosaurus quadrilineatus</i>   | Four lined plated lizard     | 5  |

### 3.4 Amphibians

| No | Species                      | Common Name       | Category |
|----|------------------------------|-------------------|----------|
| 1  | <i>Bufo gutturalis</i>       | Guttural toad     | 5        |
| 2  | <i>Hyperolius marmoratus</i> | Painted reed frog | 4        |

**3.5 Fishes (Fresh-water)**

| No | Species                                   | Common name                       | Category |
|----|-------------------------------------------|-----------------------------------|----------|
| 1  | <i>Carassius auratus</i>                  | goldfish                          | 5        |
| 2  | <i>Clarias gariepinus</i>                 | sharp-tooth catfish               | 4        |
| 3  | <i>Ctenopharyngodon idella</i>            | grass carp                        | 1b       |
| 4  | <i>Ctenopharyngodon idella (triploid)</i> | grass carp (triploid)             | 2        |
| 5  | <i>Cyprinus carpio</i>                    | carp                              | 2        |
| 6  | <i>Cyprinus carpio</i>                    | koi carp                          | 5        |
| 7  | <i>Gambusia affinis</i>                   | mosquitofish                      | 1b       |
| 8  | <i>Hypophthalmichthys molitrix</i>        | silver carp                       | 1b       |
| 9  | <i>Labeo capensis</i>                     | Orange River mudfish              | 4        |
| 10 | <i>Labeo umbratus</i>                     | moggel                            | 4        |
| 11 | <i>Labeobarbus aeneus</i>                 | Vaal-Orange smallmouth yellowfish | 4        |
| 12 | <i>Labeobarbus capensis</i>               | Clanwilliam yellowfish            | 4        |
| 13 | <i>Labeobarbus natalensis</i>             | KwaZulu-Natal yellowfish          | 4        |
| 14 | <i>Lepomis macrochirus</i>                | bluegill sunfish                  | 1b       |
| 15 | <i>Micropterus dolomieu</i>               | smallmouth bass                   | 2        |
| 16 | <i>Micropterus punctulatus</i>            | spotted bass                      | 2        |
| 17 | <i>Micropterus salmoides</i>              | largemouth bass                   | 2        |
| 18 | <i>Oncorhynchus mykiss</i>                | rainbow trout                     | 2        |
| 19 | <i>Oreochromis mossambicus</i>            | Mocambique tilapia                | 4        |
| 20 | <i>Oreochromis niloticus</i>              | Nile tilapia                      | 1b       |
| 21 | <i>Salmo trutta</i>                       | brown trout                       | 2        |
| 22 | <i>Sandelia capensis</i>                  | Cape kurper                       | 4        |
| 23 | <i>Tilapia rendalli</i>                   | redbreast tilapia                 | 4        |
| 24 | <i>Tilapia sparrmanii</i>                 | banded tilapia                    | 4        |
| 25 | <i>Tinca tinca</i>                        | Tench                             | 1b       |

**3.6 Fishes (Marine) and other Marine Species**

| No | Species                            | Common Name                      | Category |
|----|------------------------------------|----------------------------------|----------|
| 1  | <i>Carcinus maenas</i>             | European shore crab / Green crab | 1b       |
| 2  | <i>Mytilus galloprovincialis</i>   | Mediterranean mussel             | 1b       |
| 3  | All introduced aquaculture species | SEE POINTS 1 & 2 BELOW           | 2        |

NB.

- Lists to be completed (eg, Japanese oyster, Atlantic salmon, Turbot)
- Sale of live oysters not covered by (3), but may not be returned to the sea.

**3.7 Invertebrates (Fresh-water)**

| No | Species                       | Common Name           | Category |
|----|-------------------------------|-----------------------|----------|
| 1  | <i>Aedes albopictus</i>       | Asian tiger mosquito  | 1b       |
| 2  | <i>Aplexa marmorata</i>       | marbled tadpole snail | 1b       |
| 3  | <i>Cherax quadricarinatus</i> | Redclaw crayfish      | 1b       |
| 4  | <i>Cherax tenuimanus</i>      | marron                | 2        |
| 5  | <i>Lymnaea columella</i>      | amphibious pond snail | 1b       |
| 6  | <i>Marisa cornuarietis</i>    | apple snail           | 1a       |
| 7  | <i>Procambarus clarkii</i>    | red swamp crayfish    | 1a       |
| 8  | <i>Tarebia granifera</i>      | quilted malania       | 1b       |



**3.8 Invertebrates (Terrestrial)**

| No | Species                                                           | Common Name                                                        | Category |
|----|-------------------------------------------------------------------|--------------------------------------------------------------------|----------|
| 1  | <i>Apis mellifera scutellata</i>                                  | African bee                                                        | 4        |
| 2  | <i>Apis mellifera capensis</i>                                    | Cape bee                                                           | 4        |
| 3  | <i>Chlorophorus annularis</i> (Fabricius)                         | Bamboo longhorn                                                    | 5        |
| 4  | <i>Cosmopolites sordidus</i> (Germar)                             | Banana root borer                                                  | 1b       |
| 5  | <i>Dirofilaria immitis</i> Leidy, 1856                            | Heartworm nematode                                                 | 1b       |
| 6  | <i>Ditylenchus destructor</i> Thorne, 1945                        | Potato rot nematode                                                | 1b       |
| 7  | <i>Ditylenchus dipsaci</i> (Kühn, 1857) Filip'ev, 1936            | Stem and bulb nematode                                             | 1b       |
| 8  | <i>Globodera rostochiensis</i> (Wollenweber, 1923), Behrens, 1975 | Golden cyst nematode; potato cyst nematode.                        | 1b       |
| 9  | <i>Linepithema humile</i> (Mayr)                                  | Argentine ant                                                      | 5        |
| 10 | <i>Meloidogyne partityla</i> Kleynhans, 1986                      | 'Pecan nut" nematode                                               | 1b       |
| 11 | <i>Oxychilus draparnaudi</i> (Beck, 1837)                         | Draparnaud's glass snail                                           | 5        |
| 12 | <i>Pieris brassicae</i> Linnaeus                                  | Cabbage white                                                      | 5        |
| 13 | <i>Prostephanus truncatus</i> (Horn)                              | Larger grain borer                                                 | 5        |
| 14 | <i>Radopholus similis</i> (Cobb, 1893) Thorne, 1949               | Burrowing nematode                                                 | 1b       |
| 15 | <i>Theba pisana</i> (Muller, 1774)                                | white garden snail / vine snail / dune snail / white Italian snail | 5        |
| 16 | <i>Varroa destructor</i> Anderson & Trueman                       | Varroa mite                                                        | 1b       |
| 17 | <i>Vespa germanica</i> (Fabricius)                                | European wasp                                                      | 1b       |

**3.9 Plants**

| No | Species                                                                                           | Common name                   | Category                                                                                                            |
|----|---------------------------------------------------------------------------------------------------|-------------------------------|---------------------------------------------------------------------------------------------------------------------|
| 1  | <i>Acacia baileyana</i> F.Muell.                                                                  | Bailey's wattle               | 3                                                                                                                   |
| 2  | <i>Acacia cyclops</i> A.Cunn. ex G.Don                                                            | Red eye                       | 2                                                                                                                   |
| 3  | <i>Acacia dealbata</i> Link                                                                       | Silver wattle                 | Category 1a plant in Western Cape, Northern Cape, Limpopo and Free State. Category 1b plant in rest of South Africa |
| 4  | <i>Acacia decurrens</i> Willd.                                                                    | Green wattle                  | Category 1a plant in Western Cape, Northern Cape, Limpopo and Free State. Category 1b plant in rest of South Africa |
| 5  | <i>Acacia elata</i> A.Cunn. ex Benth. ( <i>Acacia terminalis</i> misapplied in South Africa)      | Pepper tree wattle            | 1b                                                                                                                  |
| 6  | <i>Acacia implexa</i> Benth.                                                                      | Screw pod wattle              | 1a                                                                                                                  |
| 7  | <i>Acacia longifolia</i> (Andrews) Willd.                                                         | Long-leaved wattle            | 1b                                                                                                                  |
| 8  | <i>Acacia mearnsii</i> De Wild.                                                                   | Black wattle                  | 2                                                                                                                   |
| 9  | <i>Acacia melanoxylon</i> R.Br.                                                                   | Australian blackwood          | Category 2 in the Garden Route from Tsitsikamma to George. Category 1b in rest of South Africa                      |
| 10 | <i>Acacia paradoxa</i> DC. (= <i>A. armata</i> R.Br.)                                             | Kangaroo wattle               | 1a                                                                                                                  |
| 11 | <i>Acacia pendula</i> A.Cunn. ex G.Don                                                            | Weeping myall                 | 5                                                                                                                   |
| 12 | <i>Acacia podalyrifolia</i> A.Cunn. ex G.Don                                                      | Pearl acacia                  | 3                                                                                                                   |
| 13 | <i>Acacia pycnantha</i> Benth.                                                                    | Golden wattle                 | 1b                                                                                                                  |
| 14 | <i>Acacia saligna</i> (Labill.) H.L.Wendl.                                                        | Port Jackson willow           | 2                                                                                                                   |
| 15 | <i>Acacia stricta</i> (Andrews) Willd.                                                            | Hop wattle                    | 1a                                                                                                                  |
| 16 | <i>Acer buergerianum</i> Miq.                                                                     | Chinese maple                 | 5                                                                                                                   |
| 17 | <i>Acer negundo</i> L.                                                                            | Ash-leaved maple, Box elder   | 5                                                                                                                   |
| 18 | <i>Agave americana</i> L. var <i>americana</i>                                                    | American agave, Century-plant | 5                                                                                                                   |
| 19 | <i>Agave americana</i> L. var <i>expansa</i> (Jacobi) Gentry                                      | Spreading century-plant       | Category 1a in Western Cape coastal belt                                                                            |
| 20 | <i>Agave sisalana</i> Perrine                                                                     | Sisal hemp, Sisal             | 2                                                                                                                   |
| 21 | <i>Ageratina adenophora</i> (Spreng.) R.M.King & H.Rob. (= <i>Eupatorium adenophorum</i> Spreng.) | Crofton weed                  | 1a                                                                                                                  |
| 22 | <i>Ageratina riparia</i> (Regel) R.M.King & H.Rob. (= <i>Eupatorium riparium</i> Regel)           | Mistflower                    | 1a                                                                                                                  |
| 23 | <i>Ageratum conyzoides</i> L.                                                                     | Invading ageratum             | 1b                                                                                                                  |
| 24 | <i>Ageratum houstonianum</i> Mill. Excluding cultivars                                            | Mexican ageratum              | 1b                                                                                                                  |

|    |                                                                                                                                                                                                                                                                                                                                                     |                                |                                                                          |
|----|-----------------------------------------------------------------------------------------------------------------------------------------------------------------------------------------------------------------------------------------------------------------------------------------------------------------------------------------------------|--------------------------------|--------------------------------------------------------------------------|
| 25 | <i>Agrimonia procera</i> Wallr.                                                                                                                                                                                                                                                                                                                     | Scented agrimony               | 5                                                                        |
| 26 | <i>Agrostis castellana</i> Boiss. & Reut.                                                                                                                                                                                                                                                                                                           | Bent grass                     | Category 1a on Prince Edward Island.<br>Category on 1b Marion Island     |
| 27 | <i>Agrostis gigantea</i> Roth                                                                                                                                                                                                                                                                                                                       | Black bent grass, redtop       | Category 1a on Prince Edward and<br>Marion Islands                       |
| 28 | <i>Agrostis stolonifera</i> L.                                                                                                                                                                                                                                                                                                                      | Creeping bent grass            | Category 1a on Prince Edward Island.<br>Category 1b on Marion Island     |
| 29 | <i>Ailanthus altissima</i> (Mill.) Swingle                                                                                                                                                                                                                                                                                                          | Tree-of-heaven                 | 1b                                                                       |
| 30 | <i>Albizia julibrissin</i> Durazz.                                                                                                                                                                                                                                                                                                                  | Silk tree, Pink siris          | 5                                                                        |
| 31 | <i>Albizia lebeck</i> (L.) Benth.                                                                                                                                                                                                                                                                                                                   | Lebeck tree                    | 1a                                                                       |
| 32 | <i>Albizia procera</i> (Roxb.) Benth.                                                                                                                                                                                                                                                                                                               | False lebeck                   | 1a                                                                       |
| 33 | <i>Alhagi maurorum</i> Medik.<br>(= <i>A. camelorum</i> Fisch.)                                                                                                                                                                                                                                                                                     | Camel thorn bush               | 1b                                                                       |
| 34 | <i>Alisma plantago-aquatica</i> L.                                                                                                                                                                                                                                                                                                                  | Mud plantain, Water alisma     | 1b                                                                       |
| 35 | <i>Alnus glutinosa</i> (L.) Gaertn.                                                                                                                                                                                                                                                                                                                 | Black alder                    | 5                                                                        |
| 36 | <i>Alopecurus geniculatus</i> L.<br>(= <i>A. australis</i> Nees)                                                                                                                                                                                                                                                                                    | Marsh foxtail, Water foxtail   | Category 1a on Prince Edward and<br>Marion Islands                       |
| 37 | <i>Ammophila arenaria</i> (L.) Link                                                                                                                                                                                                                                                                                                                 | Marram grass                   | 1b                                                                       |
| 38 | <i>Anredera cordifolia</i> (Ten.) Steenis<br>( <i>A. baselloides</i> misapplied in South Africa)                                                                                                                                                                                                                                                    | Madeira vine, Bridal wreath    | 1b                                                                       |
| 39 | <i>Antigonon leptopus</i> Hook. & Arn.                                                                                                                                                                                                                                                                                                              | Coral creeper                  | 1b                                                                       |
| 40 | <i>Araujia sericifera</i> Brot.                                                                                                                                                                                                                                                                                                                     | Moth catcher                   | 1b                                                                       |
| 41 | <i>Ardisia crenata</i> Sims<br>( <i>Ardisia crispa</i> misapplied in South Africa)                                                                                                                                                                                                                                                                  | Coralberry tree, Coral Bush    | Category 1a in KwaZulu-Natal,<br>Mpumalanga, Limpopo and Eastern<br>Cape |
| 42 | <i>Ardisia elliptica</i> Thunb.<br>(= <i>A. humilis</i> Vahl)                                                                                                                                                                                                                                                                                       | Shoebuttan ardisia             | Category 1a in KwaZulu-Natal,<br>Mpumalanga, Limpopo and Eastern<br>Cape |
| 43 | <i>Argemone mexicana</i>                                                                                                                                                                                                                                                                                                                            | Yellow-flowered Mexican poppy  | 1b                                                                       |
| 44 | <i>Argemone ochroleuca</i> Sweet subsp.<br><i>ochroleuca</i><br>(= <i>A. subfusiformis</i> G.B.Ownbey)                                                                                                                                                                                                                                              | White-flowered Mexican poppy   | 1b                                                                       |
| 45 | <i>Aristolochia elegans</i> Mast.                                                                                                                                                                                                                                                                                                                   | Dutchman's pipe                | 1b                                                                       |
| 46 | <i>Arundo donax</i> L.                                                                                                                                                                                                                                                                                                                              | Giant reed                     | 1b                                                                       |
| 47 | <i>Atriplex inflata</i> F. Muell.<br>(= <i>A. lindleyi</i> Moq. subsp. <i>inflata</i> (F.<br>Muell.) Paul G. Wilson)                                                                                                                                                                                                                                | Sponge-fruit saltbush          | 1b                                                                       |
| 48 | <i>Atriplex nummularia</i> Lindl. Subsp.<br><i>Nummularia</i>                                                                                                                                                                                                                                                                                       | Old man saltbush               | 2                                                                        |
| 49 | <i>Avena</i> spp. excluding <i>A. sativa</i><br>(includes <i>A. barbata</i> Pott ex Link, <i>A. fatua</i><br>L., <i>A. sterilis</i> L.)                                                                                                                                                                                                             | Wild oats                      | 5                                                                        |
| 50 | <i>Azolla filiculoides</i> Lam.                                                                                                                                                                                                                                                                                                                     | Azolla, Red water fern         | 1b                                                                       |
| 51 | <i>Bartlettina sordida</i> (Less.) R.M. King &<br>H.Rob.<br>(= <i>Eupatorium atrorubens</i> (Lem.)<br>G.Nicholson, <i>E. sordidum</i> Less.)                                                                                                                                                                                                        | Bartlettina                    | 1a                                                                       |
| 52 | <i>Bauhinia purpurea</i> L.                                                                                                                                                                                                                                                                                                                         | Butterfly orchid tree          | Category 1a in KwaZulu-Natal,<br>Mpumalanga, Limpopo and Eastern<br>Cape |
| 53 | <i>Bauhinia variegata</i> L.                                                                                                                                                                                                                                                                                                                        | Orchid tree                    | Category 1a in KwaZulu-Natal,<br>Mpumalanga, Limpopo and Eastern<br>Cape |
| 54 | <i>Berberis thunbergii</i> DC.                                                                                                                                                                                                                                                                                                                      | Japanese barberry              | 5                                                                        |
| 55 | <i>Billardiera heterophylla</i> (Lindl.)<br>L.W.Cayzer & Crisp<br>(= <i>Sollya heterophylla</i> Lindl.)                                                                                                                                                                                                                                             | Bluebell creeper               | 1a                                                                       |
| 56 | <i>Bougainvillea glabra</i> Choisy                                                                                                                                                                                                                                                                                                                  | Bougainvillea, Paper flower    | 5                                                                        |
| 57 | <i>Bougainvillea spectabilis</i> Willd.                                                                                                                                                                                                                                                                                                             | Great bougainvillea            | 5                                                                        |
| 58 | <i>Brachychiton populneus</i> (Schott & Endl.)<br>R.Br.                                                                                                                                                                                                                                                                                             | Kurrajong, Bottle tree         | 3                                                                        |
| 59 | <i>Bromus</i> spp.<br>(includes <i>B. commutatus</i> Schrad., <i>B.</i><br><i>diandrus</i> Roth, <i>B. japonicus</i> Thunb., <i>B.</i><br><i>hordaceus</i> L. subsp. <i>divaricatus</i> (Bonnier<br>& Layens) Kerguelen (= <i>B. molliformis</i><br>J.Lloyd), <i>B. catharticus</i> Vahl var.<br><i>catharticus</i> (= <i>B. uniolooides</i> Kunth) | Brome spp.                     | 5                                                                        |
| 60 | <i>Bryophyllum delagoense</i> (Eckl. & Zeyh.)<br>Schinz<br>(= <i>B. tubiflorum</i> Harv., <i>Kalanchoe tubiflora</i><br>(Harv.) Raym.- Hamet, <i>K. delagoensis</i><br>Eckl. & Zeyh.)                                                                                                                                                               | Chandelier plant               | 1b                                                                       |
| 61 | <i>Bryophyllum pinnatum</i> (Lam.) Oken                                                                                                                                                                                                                                                                                                             | Green mother of millions       | 1b                                                                       |
| 62 | <i>Buddleja davidii</i> Franch.                                                                                                                                                                                                                                                                                                                     | Chinese sagewood, Summer lilac | 3                                                                        |

|     |                                                                                                       |                                               |                                                                                                                                         |
|-----|-------------------------------------------------------------------------------------------------------|-----------------------------------------------|-----------------------------------------------------------------------------------------------------------------------------------------|
| 63  | <i>Buddleja madagascariensis</i> Lam.                                                                 | Madagascar sagewood                           | 3                                                                                                                                       |
| 64  | <i>Caesalpinia decapetala</i> (Roth) Alston<br>(= <i>C. sepiaria</i> Roxb.)                           | Mauritius thorn                               | 1b                                                                                                                                      |
| 65  | <i>Caesalpinia gilliesii</i> (Hook.) D.Dietr.                                                         | Bird-of-paradise flower                       | 1a                                                                                                                                      |
| 66  | <i>Callisia repens</i> (Jacq.) L.                                                                     | Creeping inch plant                           | 1a                                                                                                                                      |
| 67  | <i>Callistemon citrinus</i> (Curtis) Skeels                                                           | Lemon bottlebrush                             | 5                                                                                                                                       |
| 68  | <i>Callistemon rigidus</i> R.Br.                                                                      | Stiff-leaved bottlebrush                      | Category 1a in Western and Eastern Cape                                                                                                 |
| 69  | <i>Callistemon viminalis</i> (Sol. ex Gaertn.)<br>G.Don                                               | Weeping bottlebrush                           | Category 1a in KwaZulu-Natal,<br>Mpumalanga, Limpopo and Eastern<br>Cape                                                                |
| 70  | <i>Calotropis procera</i> (Aiton) W.T.Aiton                                                           | Calotropis, Giant-milkweed                    | 5                                                                                                                                       |
| 71  | <i>Campuloclinium macrocephalum</i> (Less.)<br>DC. (= <i>Eupatorium macrocephalum</i> Less.)          | Pom pom weed                                  | Category 1b in Gauteng. Category 1a in<br>rest of South Africa                                                                          |
| 72  | <i>Canna indica</i> L.<br>Excluding hybrid cultivars                                                  | Indian shot                                   | 1b                                                                                                                                      |
| 73  | <i>Cardiospermum grandiflorum</i> Sw.                                                                 | Balloon vine                                  | 1b                                                                                                                                      |
| 74  | <i>Cardiospermum halicacabum</i> L.                                                                   | Lesser balloon vine                           | 3                                                                                                                                       |
| 75  | <i>Casuarina cunninghamiana</i> Miq.                                                                  | Beefwood                                      | Category 1b in Western Cape.<br>Category 2 in rest of South Africa                                                                      |
| 76  | <i>Casuarina equisetifolia</i> L.                                                                     | Horsetail tree                                | 2                                                                                                                                       |
| 77  | <i>Catharanthus roseus</i> (L.) G.Don                                                                 | Madagascar periwinkle                         | 5                                                                                                                                       |
| 78  | <i>Celtis australis</i> L.                                                                            | Nettle tree, European hackberry               | 5                                                                                                                                       |
| 79  | <i>Celtis occidentalis</i> L.                                                                         | Common hackberry                              | 5                                                                                                                                       |
| 80  | <i>Celtis sinensis</i> Pers.                                                                          | Chinese nettle tree                           | 5                                                                                                                                       |
| 81  | <i>Cerastium fontanum</i> Baumg.                                                                      | Common mouse-ear chickweed                    | Category 1b on Prince Edward and<br>Marion Islands                                                                                      |
| 82  | <i>Cereus jamacaru</i> DC.<br>( <i>C. peruvianus</i> misapplied in South Africa)                      | Queen of the night                            | Category 1b in North West, Gauteng,<br>Mpumalanga and Limpopo. Category<br>1a in rest of South Africa                                   |
| 83  | <i>Cestrum aurantiacum</i> Lindl.                                                                     | Yellow or Orange cestrum                      | 1b                                                                                                                                      |
| 84  | <i>Cestrum elegans</i> (Brongn.) Schldl.<br>(= <i>C. purpureum</i> (Lindl.) Standl.)                  | Crimson cestrum                               | 1a                                                                                                                                      |
| 85  | <i>Cestrum laevigatum</i> Schldl.                                                                     | Inkberry                                      | 1b                                                                                                                                      |
| 86  | <i>Cestrum parqui</i> L'Hér.                                                                          | Chilean inkberry                              | 1a                                                                                                                                      |
| 87  | <i>Cestrum</i> spp. excluding sterile cultivars                                                       | <i>Cestrum</i> spp.                           | 1a                                                                                                                                      |
| 88  | <i>Chondrilla juncea</i> L.                                                                           | Skeleton weed                                 | 1a                                                                                                                                      |
| 89  | <i>Chromolaena odorata</i> (L.) R.M.King &<br>H.Rob. (= <i>Eupatorium odoratum</i> L.)                | Triffid weed, Chromolaena                     | Category 1b in KwaZulu-Natal,<br>Limpopo, Mpumalanga and Eastern<br>Cape north of East – London. Category<br>1a in rest of South Africa |
| 90  | <i>Chrysopogon zizanioides</i> (L.) Roberty<br>(= <i>Vetiveria zizanioides</i> (L.) Nash)             | Vetiver grass                                 | 5                                                                                                                                       |
| 91  | <i>Cichorium intybus</i> L.                                                                           | Chicory                                       | 2                                                                                                                                       |
| 92  | <i>Cinnamomum camphora</i> (L.) J.Presl                                                               | Camphor tree                                  | Category 1b in KwaZulu-Natal,<br>Mpumalanga, Eastern and Western<br>Cape                                                                |
| 93  | <i>Cirsium vulgare</i> (Savi) Ten.<br>(= <i>C. lanceolatum</i> (L.) Scop.)                            | Spear thistle, Scotch thistle                 | 1b                                                                                                                                      |
| 94  | <i>Coffea arabica</i> L.                                                                              | Coffee tree                                   | 5                                                                                                                                       |
| 95  | <i>Convolvulus arvensis</i> L.                                                                        | Field bindweed, Wild morning-<br>glory        | 1b                                                                                                                                      |
| 96  | <i>Coreopsis lanceolata</i> L.                                                                        | Coreopsis, Tickseed                           | 1a                                                                                                                                      |
| 97  | <i>Cortaderia jubata</i> (Lemoine ex Carrière)<br>Stapf                                               | Pampas grass                                  | Category 1b in Gauteng. Category 1a in<br>rest of South Africa                                                                          |
| 98  | <i>Cortaderia selloana</i> (Schult.) Asch. &<br>Graebn.<br>Excluding sterile cultivars                | Pampas grass                                  | Category 1b in Western and Eastern<br>Cape, KwaZulu-Natal and Gauteng,<br>Category 1a in rest of South Africa                           |
| 99  | <i>Cotoneaster franchetii</i> Bois                                                                    | Cotoneaster                                   | 1b                                                                                                                                      |
| 100 | <i>Cotoneaster glaucophyllus</i> Franch.                                                              | Late cotoneaster                              | 5                                                                                                                                       |
| 101 | <i>Cotoneaster pannosus</i> Franch.                                                                   | Silver leaf cotoneaster                       | 1b                                                                                                                                      |
| 102 | <i>Cotoneaster salicifolius</i> Franch.                                                               | Willow-leaved showberry                       | 5                                                                                                                                       |
| 103 | <i>Cotoneaster simonsii</i> Baker                                                                     | Himalayan cotoneaster, Simon's<br>cotoneaster | 5                                                                                                                                       |
| 104 | <i>Crataegus mexicana</i> DC.<br>(= <i>C. pubescens</i> misapplied in South<br>Africa.)               | Mexican hawthorn                              | 5                                                                                                                                       |
| 105 | <i>Crataegus monogyna</i> Jacq.<br>(= <i>C. oxyacantha</i> L. var. <i>praecox</i> hort. ex<br>Loudon) | English hawthorn, Common<br>hawthorn          | 5                                                                                                                                       |
| 106 | <i>Crataegus phaenopyrum</i> (L.f.) Medik.                                                            | Washington thorn                              | 5                                                                                                                                       |
| 107 | <i>Crotalaria agatiflora</i> Schweinf.                                                                | Canarybird bush, bird flower                  | 1a                                                                                                                                      |
| 108 | <i>Cryptostegia grandiflora</i> R.Br.                                                                 | Rubber vine                                   | 1a                                                                                                                                      |
| 109 | <i>Cryptostegia madagascariensis</i> Bojer ex<br>Decne.                                               | Madagascar rubber vine                        | 1a                                                                                                                                      |

|     |                                                                                                                                                      |                                                 |                                                                               |
|-----|------------------------------------------------------------------------------------------------------------------------------------------------------|-------------------------------------------------|-------------------------------------------------------------------------------|
| 110 | <i>Cuscuta campestris</i> Yunck.                                                                                                                     | Common dodder                                   | 1b                                                                            |
| 111 | <i>Cuscuta suaveolens</i> Ser.                                                                                                                       | Lucerne dodder                                  | 1b                                                                            |
| 112 | <i>Cyathea australis</i> (R.Br.) Domin                                                                                                               | Rough tree fern                                 | Category 1a in KwaZulu-Natal, Mpumalanga, Limpopo, Eastern Cape, Western Cape |
| 113 | <i>Cyathea cooperi</i> (Hook. ex F.Muell.) Domin (= <i>Sphaeropteris cooperi</i> (Hook. ex F. Muell.) R.M.Tryon)                                     | Australian tree fern                            | Category 1a in KwaZulu-Natal, Mpumalanga, Limpopo, Eastern Cape, Western Cape |
| 114 | <i>Cytisus scoparius</i> (L.) Link (= <i>Genista scoparia</i> (L.) Lam.)                                                                             | Scotch broom                                    | 1a                                                                            |
| 115 | <i>Datura ferox</i> L.                                                                                                                               | Large thorn apple                               | 1b                                                                            |
| 116 | <i>Datura innoxia</i> Mill.                                                                                                                          | Downy thorn apple                               | 1b                                                                            |
| 117 | <i>Datura stramonium</i> L.                                                                                                                          | Common thorn apple                              | 1b                                                                            |
| 118 | <i>Duchesnea indica</i> (Andrews) Focke                                                                                                              | Wild strawberry                                 | 1b                                                                            |
| 119 | <i>Duranta erecta</i> L. (= <i>D. repens</i> L., <i>D. plumieri</i> Jacq.)                                                                           | Forget-me-not-tree, Pigeon berry                | 3                                                                             |
| 120 | <i>Echinopsis spachiana</i> (Lem.) Friedrich & G.D.Rowley (= <i>Trichocereus spachianus</i> (Lem.) Riccob.)                                          | Torch cactus                                    | 1b                                                                            |
| 121 | <i>Echium plantagineum</i> L. (= <i>E. lycopsis</i> L.)                                                                                              | Patterson's curse                               | 1b                                                                            |
| 122 | <i>Echium vulgare</i> L.                                                                                                                             | Blue echium                                     | 1b                                                                            |
| 123 | <i>Egeria densa</i> Planch. (= <i>Elodea densa</i> (Planch.) Casp.)                                                                                  | Dense water weed                                | 1a                                                                            |
| 124 | <i>Eichhornia crassipes</i> (Mart.) Solms                                                                                                            | Water hyacinth                                  | 1b                                                                            |
| 125 | <i>Elodea canadensis</i> Michx.                                                                                                                      | Canadian water weed                             | 1a                                                                            |
| 126 | <i>Elytrigia repens</i> (L.) Desv. ex Nevski (= <i>Agropyron repens</i> (L.) P. Beauv., <i>Elymus repens</i> (L.) Gould)                             | Couch grass                                     | Category 1a on Prince Edward and Marion Islands                               |
| 127 | <i>Equisetum hyemale</i> L.                                                                                                                          | Rough horsetail, Common scouring-rush           | 1a                                                                            |
| 128 | <i>Eriobotrya japonica</i> (Thunb.) Lindl.                                                                                                           | Loquat                                          | 3                                                                             |
| 129 | <i>Eucalyptus camaldulensis</i> Dehnh.                                                                                                               | Red river gum                                   | 2                                                                             |
| 130 | <i>Eucalyptus cladocalyx</i> F.Muell.                                                                                                                | Sugar gum                                       | 2                                                                             |
| 131 | <i>Eucalyptus conferruminata</i> D.J.Carr & S.G.M.Carr ( <i>E. lehmannii</i> misapplied in South Africa)                                             | Spider gum                                      | 1b                                                                            |
| 132 | <i>Eucalyptus diversicolor</i> F.Muell.                                                                                                              | Karri                                           | 2                                                                             |
| 133 | <i>Eucalyptus globulus</i> Labill.                                                                                                                   | Blue gum, Tasmanian blue gum                    | 5                                                                             |
| 134 | <i>Eucalyptus gomphocephala</i> DC.                                                                                                                  | Tuart                                           | 5                                                                             |
| 135 | <i>Eucalyptus grandis</i> W.Hill ex Maiden ( <i>E. saligna</i> Sm. in part) and hybrids                                                              | Saligna gum, Rose gum                           | 2                                                                             |
| 136 | <i>Eucalyptus microcorys</i> F.Muell.                                                                                                                | Tallow gum                                      | 5                                                                             |
| 137 | <i>Eucalyptus paniculata</i> Sm.                                                                                                                     | Grey ironbark                                   | 5                                                                             |
| 138 | <i>Eucalyptus sideroxylon</i> A.Cunn. ex Woolls                                                                                                      | Black ironbark, Red ironbark                    | 5                                                                             |
| 139 | <i>Eugenia uniflora</i> L.                                                                                                                           | Pitanga, Surinam cherry                         | 1a                                                                            |
| 140 | <i>Euphorbia leucocephala</i> Lotsy                                                                                                                  | White poinsettia                                | 5                                                                             |
| 141 | <i>Euphorbia pulcherrima</i> Willd. ex Klotzsch                                                                                                      | Poinsettia                                      | 5                                                                             |
| 142 | <i>Fallopia sachalinensis</i> (F.Schmidt) Ronse Decr. (= <i>Polygonum sachalinense</i> F.Schmidt, <i>Reynoutria sachalinensis</i> (F.Schmidt) Nakai) | Giant knotweed                                  | 1a                                                                            |
| 143 | <i>Festuca rubra</i> L.                                                                                                                              | Creeping red fescue                             | Category 1a on Prince Edward and Marion Islands                               |
| 144 | <i>Flaveria bidentis</i> (L.) Kuntze                                                                                                                 | Smelter's-bush                                  | 5                                                                             |
| 145 | <i>Foeniculum vulgare</i> Mill.                                                                                                                      | Fennel                                          | 5                                                                             |
| 146 | <i>Fraxinus americana</i> L.                                                                                                                         | American ash                                    | 5                                                                             |
| 147 | <i>Fraxinus angustifolia</i> Vahl                                                                                                                    | Algerian ash                                    | 5                                                                             |
| 148 | <i>Genista monspessulana</i> (L.) L.A.S.Johnson (= <i>Cytisus monspessulanus</i> L., <i>C. candicans</i> (L.) DC.)                                   | Montpellier broom                               | 1a                                                                            |
| 149 | <i>Gleditsia triacanthos</i> L. Excluding sterile cultivars                                                                                          | Honey locust                                    | 1b                                                                            |
| 150 | <i>Grevillea banksii</i> R.Br.                                                                                                                       | Australian crimson oak, Red flowering silky oak | 1a                                                                            |
| 151 | <i>Grevillea robusta</i> A.Cunn. ex R.Br.                                                                                                            | Australian silky oak                            | 3                                                                             |
| 152 | <i>Grevillea rosmarinifolia</i> A.Cunn.                                                                                                              | Rosemary grevillea                              | 5                                                                             |
| 153 | <i>Hakea drupacea</i> (C.F.Gaertn.) Roem. & Schult. (= <i>H. suaveolens</i> R.Br.)                                                                   | Sweet hakea                                     | 1a                                                                            |
| 154 | <i>Hakea gibbosa</i> (Sm.) Cav.                                                                                                                      | Rock hakea                                      | 1b                                                                            |
| 155 | <i>Hakea salicifolia</i> (Vent.) B.L.Burt (= <i>H. saligna</i> Knight)                                                                               | Willow hakea                                    | 5                                                                             |
| 156 | <i>Hakea sericea</i> Schrad. & J.C.Wendl.                                                                                                            | Silky hakea                                     | 1b                                                                            |
| 157 | <i>Harrisia martinii</i> (Labour.) Britton & Rose                                                                                                    | Moon cactus, <i>Harrisia cactus</i>             | 1b                                                                            |

|     |                                                                                                                          |                                              |                                                                                                                                                                                                                    |
|-----|--------------------------------------------------------------------------------------------------------------------------|----------------------------------------------|--------------------------------------------------------------------------------------------------------------------------------------------------------------------------------------------------------------------|
|     | (= <i>Eriocereus martinii</i> (Labour.) Riccob.)                                                                         |                                              |                                                                                                                                                                                                                    |
| 158 | <i>Hedera helix</i> L. subsp. <i>canariensis</i> (Willd.) Cout.                                                          | Canary ivy, Madeira ivy, Algerian ivy        | 5                                                                                                                                                                                                                  |
| 159 | <i>Hedera helix</i> L. subsp. <i>Helix</i>                                                                               | English ivy                                  | 5                                                                                                                                                                                                                  |
| 160 | <i>Hedychium coccineum</i> Buch.-Ham. Ex Sm.                                                                             | Red ginger lily                              | 1a                                                                                                                                                                                                                 |
| 161 | <i>Hedychium coronarium</i> J.König                                                                                      | White ginger lily                            | 1a                                                                                                                                                                                                                 |
| 162 | <i>Hedychium flavescens</i> Carey ex Roscoe                                                                              | Yellow ginger lily                           | 1a                                                                                                                                                                                                                 |
| 163 | <i>Hedychium gardnerianum</i> Sheppard ex Ker Gawl.                                                                      | Kahili ginger lily                           | 1a                                                                                                                                                                                                                 |
| 164 | <i>Houttuynia cordata</i> Thunb.                                                                                         | Chameleon plant                              | 3                                                                                                                                                                                                                  |
| 165 | <i>Hydrocleys nymphoides</i> (Humb. & Bonpl. ex Willd.) Buchenau                                                         | Water poppy                                  | 1a                                                                                                                                                                                                                 |
| 166 | <i>Hylocereus undatus</i> (Haw.) Britton & Rose                                                                          | Night-blooming cereus                        | 1b                                                                                                                                                                                                                 |
| 167 | <i>Hypericum perforatum</i> L.                                                                                           | St. John's wort, Tipton weed                 | 2                                                                                                                                                                                                                  |
| 168 | <i>Ipomoea alba</i> L.                                                                                                   | Moonflower                                   | 1b                                                                                                                                                                                                                 |
| 169 | <i>Ipomoea carnea</i> Jacq. subsp. <i>fistulosa</i> (Mart. ex Choisy) D.F.Austin (= <i>I. fistulosa</i> Mart. ex Choisy) | Morning-glory bush                           | Category 1b in KwaZulu-Natal, Mpumalanga and Limpopo. Category 1a in rest of South Africa                                                                                                                          |
| 170 | <i>Ipomoea indica</i> (Burm.) Merr. (= <i>I. congesta</i> R.Br.)                                                         | Morning glory                                | 1b                                                                                                                                                                                                                 |
| 171 | <i>Ipomoea purpurea</i> (L.) Roth                                                                                        | Morning glory                                | 1b                                                                                                                                                                                                                 |
| 172 | <i>Iris pseudacorus</i> L.                                                                                               | Yellow flag                                  | 1a                                                                                                                                                                                                                 |
| 173 | <i>Jacaranda mimosifolia</i> D.Don                                                                                       | Jacaranda                                    | Category 1b in KwaZulu-Natal, Mpumalanga and Limpopo. Category 2 in Gauteng, Category 3, Northern, Western and Eastern Cape. (For Category 2, this can be demarcated in areas broader than individual properties.) |
| 174 | <i>Jatropha curcas</i> L.                                                                                                | Physic nut                                   | 2                                                                                                                                                                                                                  |
| 175 | <i>Jatropha gossypifolia</i> L.                                                                                          | Cotton-leaf physic nut                       | 1a                                                                                                                                                                                                                 |
| 176 | <i>Jatropha multifida</i> L.                                                                                             | Coral plant                                  | 5                                                                                                                                                                                                                  |
| 177 | <i>Juniperus virginiana</i> L.                                                                                           | Red cedar                                    | Category 3 in Free State and Eastern Cape                                                                                                                                                                          |
| 178 | <i>Lablab purpureus</i> (L.) Sweet                                                                                       | Lablab bean                                  | 5                                                                                                                                                                                                                  |
| 179 | All seed producing species or seed producing hybrids of <i>Lantana</i> that are non-indigenous to Africa.                | Lantana, Tickberry, Cherry pie               | 1b                                                                                                                                                                                                                 |
| 180 | <i>Lepidium draba</i> L. (= <i>Cardaria draba</i> (L.) Desv.)                                                            | Hoary cardaria                               | 1b                                                                                                                                                                                                                 |
| 181 | <i>Leptospermum laevigatum</i> (Gaertn.) F.Muell.                                                                        | Australian myrtle                            | 1b                                                                                                                                                                                                                 |
| 182 | <i>Leptospermum scoparium</i> J.R.Forst. & G.Forst.                                                                      | Manuka myrtle                                | 5                                                                                                                                                                                                                  |
| 183 | <i>Leucaena leucocephala</i> (Lam.) de Wit (= <i>L. glauca</i> Benth.)                                                   | Leucaena                                     | Category 1a in Western Cape. Category 2 in rest of South Africa                                                                                                                                                    |
| 184 | <i>Ligustrum japonicum</i> Thunb.                                                                                        | Japanese wax-leaved privet                   | Category 1b In KwaZulu-Natal, Mpumalanga, Limpopo, Eastern and Western Cape and Gauteng. Category 3 in Free State and North West                                                                                   |
| 185 | <i>Ligustrum lucidum</i> W.T.Aiton                                                                                       | Chinese wax-leaved privet                    | Category 1b In KwaZulu-Natal, Mpumalanga, Limpopo, Eastern and Western Cape and Gauteng. Category 3 in Free State and North West                                                                                   |
| 186 | <i>Ligustrum ovalifolium</i> Hassk.                                                                                      | Californian privet                           | Category 1b In KwaZulu-Natal, Mpumalanga, Limpopo, Eastern and Western Cape and Gauteng. Category 3 in Free State and North West                                                                                   |
| 187 | <i>Ligustrum sinense</i> Lour.                                                                                           | Chinese privet                               | Category 1b In KwaZulu-Natal, Mpumalanga, Limpopo, Eastern and Western Cape and Gauteng. Category 3 in Free State and North West                                                                                   |
| 188 | <i>Ligustrum vulgare</i> L.                                                                                              | Common privet                                | Category 1b In KwaZulu-Natal, Mpumalanga, Limpopo, Eastern and Western Cape and Gauteng. Category 3 in Free State and North West                                                                                   |
| 189 | <i>Lilium formosanum</i> Wallace (= <i>L. longiflorum</i> Thunb. var. <i>formosanum</i> Baker)                           | St Joseph's lily, Trumpet lily, Formosa lily | 1a                                                                                                                                                                                                                 |
| 190 | <i>Litsea glutinosa</i> (Lour.) C.B.Rob. (= <i>Litsea sebifera</i> Pers.)                                                | Indian laurel                                | 1b                                                                                                                                                                                                                 |
| 191 | <i>Lolium multiflorum</i> Lam.                                                                                           | Italian ryegrass                             | 5                                                                                                                                                                                                                  |
| 192 | <i>Lolium perenne</i> L.                                                                                                 | Perennial ryegrass                           | 5                                                                                                                                                                                                                  |

|     |                                                                                                                                                                  |                                          |                                                                                                                         |
|-----|------------------------------------------------------------------------------------------------------------------------------------------------------------------|------------------------------------------|-------------------------------------------------------------------------------------------------------------------------|
| 193 | <i>Lonicera japonica</i> Thunb. 'Halliana'                                                                                                                       | Japanese or Hall's honeysuckle           | 3                                                                                                                       |
| 194 | <i>Luzula</i> sp.                                                                                                                                                | Woodrush                                 | Category 1a on Prince Edward and Marion Islands                                                                         |
| 195 | <i>Lythrum hyssopifolia</i> L.                                                                                                                                   | Hyssop loosestrife                       | 5                                                                                                                       |
| 196 | <i>Lythrum salicaria</i> L.                                                                                                                                      | Purple loosestrife                       | 1a                                                                                                                      |
| 197 | <i>Macfadyena unguis-cati</i> (L.) A.H.Gentry                                                                                                                    | Cat's claw creeper                       | 1b                                                                                                                      |
| 198 | <i>Malva dendromorpha</i> M.F.Ray<br>(= <i>Lavatera arborea</i> L.)                                                                                              | Tree mallow                              | 5                                                                                                                       |
| 199 | <i>Malva verticillata</i> L.                                                                                                                                     | Mallow                                   | 5                                                                                                                       |
| 200 | <i>Malvastrum coromandelianum</i> (L.) Garcke                                                                                                                    | Prickly malvastrum                       | 5                                                                                                                       |
| 201 | <i>Melaleuca hypericifolia</i> Sm.                                                                                                                               | Red-flowering tea tree                   | 1a                                                                                                                      |
| 202 | <i>Melia azedarach</i> L.                                                                                                                                        | Seringa                                  | Category 1b in KwaZulu-Natal, Mpumalanga and Limpopo. Category 3 elsewhere except in the Northern Cape with no category |
| 203 | <i>Melilotus indica</i> (L.) All.                                                                                                                                | Annual yellow sweet clover               | 5                                                                                                                       |
| 204 | <i>Metrosideros excelsa</i> Sol. ex Gaertn.<br>(= <i>M. tomentosa</i> A.Rich.)                                                                                   | New Zealand Christmas tree               | Category 1a in Overstrand District                                                                                      |
| 205 | <i>Mimosa pigra</i> L.                                                                                                                                           | Giant sensitive plant                    | 1b                                                                                                                      |
| 206 | <i>Mirabilis jalapa</i> L.                                                                                                                                       | Four-o'clock, Marvel-of-Peru             | 1b                                                                                                                      |
| 207 | <i>Montanoa hibiscifolia</i> Benth.                                                                                                                              | Montanoa, Tree daisy                     | 1b                                                                                                                      |
| 208 | <i>Moringa oleifera</i> Lam.<br>(= <i>Moringa pterygosperma</i> Gaertn.)                                                                                         | Horse-radish tree                        | 5                                                                                                                       |
| 209 | <i>Morus alba</i> L.                                                                                                                                             | White mulberry, Common mulberry          | 2                                                                                                                       |
| 210 | <i>Morus nigra</i> L.                                                                                                                                            | Black mulberry                           | 5                                                                                                                       |
| 211 | <i>Murraya paniculata</i> (L.) Jack.<br>(= <i>M. exotica</i> L.)                                                                                                 | Orange Jessamine                         | Category 1a in KwaZulu-Natal, Mpumalanga, Limpopo and Eastern Cape. Category 1b for rest of country                     |
| 212 | <i>Myoporum</i> spp.                                                                                                                                             | Manatoka trees                           | 5                                                                                                                       |
| 213 | <i>Myoporum insulare</i> R.Br.                                                                                                                                   | Manatoka, Boobyalla                      | 5                                                                                                                       |
| 214 | <i>Myoporum laetum</i> G.Forst.                                                                                                                                  | New Zealand manatoka                     | 5                                                                                                                       |
| 215 | <i>Myoporum tenuifolium</i> G.Forst. subsp. <i>montanum</i> (R.Br.) Chinnock<br>(= <i>M. montanum</i> R.Br.), ( <i>M. acuminatum</i> misapplied in South Africa) | Manatoka                                 | 1b                                                                                                                      |
| 216 | <i>Myriophyllum aquaticum</i> (Vell.) Verdc.                                                                                                                     | Parrot's feather                         | 1b                                                                                                                      |
| 217 | <i>Myriophyllum spicatum</i> L.                                                                                                                                  | Spiked water-milfoil                     | 1b                                                                                                                      |
| 218 | <i>Nassella tenuissima</i> (Trin.) Barkworth<br>(= <i>Stipa tenuissima</i> Trin.)                                                                                | White tussock                            | 1b                                                                                                                      |
| 219 | <i>Nassella trichotoma</i> (Nees) Hack. ex Arechav. (= <i>Stipa trichotoma</i> Nees)                                                                             | Nassella tussock                         | 1b                                                                                                                      |
| 220 | <i>Nasturtium officinale</i> R.Br.<br>(= <i>Rorippa nasturtium-aquaticum</i> (L.) Hayek)                                                                         | Watercress                               | 2                                                                                                                       |
| 221 | <i>Nephrolepis cordifolia</i> (L.) C.Presl<br>(= <i>Polypodium cordifolium</i> L.)                                                                               | Erect sword fern, Ladder sword fern      | Category 1b in KwaZulu-Natal, Mpumalanga, Limpopo, Eastern and Western Cape. Category 3 in rest of South Africa         |
| 222 | <i>Nephrolepis exaltata</i> (L.) Schott<br>(= <i>Polypodium exaltatum</i> L.)                                                                                    | Sword fern, Boston sword fern            | Category 1b in KwaZulu-Natal, Mpumalanga, Limpopo, Eastern and Western Cape. Category 3 in rest of South Africa         |
| 223 | <i>Nerium oleander</i> L.<br>Excluding sterile, double – flowered cultivars                                                                                      | Oleander                                 | Category 1a in Eastern and Western Cape                                                                                 |
| 224 | <i>Nicandra physalodes</i> (L.) Gaertn.                                                                                                                          | Apple-of-Peru                            | 5                                                                                                                       |
| 225 | <i>Nicotiana glauca</i> Graham                                                                                                                                   | Wild tobacco                             | 1b                                                                                                                      |
| 226 | <i>Nymphaea mexicana</i> Zucc. and hybrids                                                                                                                       | Yellow water lilies                      | 1b                                                                                                                      |
| 227 | <i>Oenothera biennis</i> L.                                                                                                                                      | Common evening-primrose                  | 5                                                                                                                       |
| 228 | <i>Oenothera glazioviana</i> Micheli                                                                                                                             | Evening-primrose                         | 5                                                                                                                       |
| 229 | <i>Oenothera indecora</i> Cambess.                                                                                                                               | Evening primrose                         | 5                                                                                                                       |
| 230 | <i>Oenothera jamesii</i> Torr. & A.Gray                                                                                                                          | Giant evening-primrose                   | 5                                                                                                                       |
| 231 | <i>Oenothera rosea</i> L'Hér. ex Aiton                                                                                                                           | Pink evening primrose                    | 5                                                                                                                       |
| 232 | <i>Oenothera stricta</i> Ledeb. ex Link                                                                                                                          | Sweet sundrop                            | 5                                                                                                                       |
| 233 | <i>Oenothera tetraptera</i> Cav.                                                                                                                                 | White evening primrose                   | 5                                                                                                                       |
| 234 | <i>Opuntia aurantiaca</i> Lindl.                                                                                                                                 | Jointed cactus                           | 1b                                                                                                                      |
| 235 | <i>Opuntia engelmannii</i> Salm-Dyck ex Engelm. (= <i>O. lindheimeri</i> Engelm.)                                                                                | Small round-leaved prickly pear          | 1b                                                                                                                      |
| 236 | <i>Opuntia exaltata</i> A.Berger<br>(= <i>Austrocylindropuntia exaltata</i> (A.Berger) Backeb.)                                                                  | Long spine cactus                        | 1a                                                                                                                      |
| 237 | <i>Opuntia ficus-indica</i> (L.) Mill.<br>(= <i>O. megacantha</i> Salm-Dyck)<br>Excluding all spineless cactus pear cultivars and selections                     | Mission prickly pear, Sweet prickly pear | 1b                                                                                                                      |
| 238 | <i>Opuntia fulgida</i> Engelm.                                                                                                                                   | Rosea cactus, Chain-fruit chollar        | 1b                                                                                                                      |

|     |                                                                                                                                                   |                                                       |                                                                           |
|-----|---------------------------------------------------------------------------------------------------------------------------------------------------|-------------------------------------------------------|---------------------------------------------------------------------------|
|     | ( <i>O. rosea</i> misapplied in South Africa)                                                                                                     |                                                       |                                                                           |
| 239 | <i>Opuntia humifusa</i> (Raf.) Raf.<br>( <i>O. compressa</i> misapplied in South Africa)                                                          | Large flowered prickly pear,<br>Creeping prickly pear | 1b                                                                        |
| 240 | <i>Opuntia imbricata</i> (Haw.) DC.<br>(= <i>Cylindropuntia imbricata</i> (Haw.)<br>F.M.Knuth)                                                    | Imbricate cactus, Imbricate prickly<br>pear           | 1b                                                                        |
| 241 | <i>Opuntia microdasys</i> (Lehm.) Pfeiff.                                                                                                         | Yellow bunny-ears, Teddy-bear<br>cactus               | 1a                                                                        |
| 242 | <i>Opuntia monacantha</i> Haw.<br>( <i>O. vulgaris</i> misapplied in South Africa)                                                                | Cochineal prickly pear, Drooping<br>prickly pear      | 1b                                                                        |
| 243 | <i>Opuntia robusta</i> H.L.Wendl. ex Pfeiff.                                                                                                      | Blue-leaf cactus                                      | 2                                                                         |
| 244 | <i>Opuntia spinulifera</i> Salm-Dyck                                                                                                              | Saucepan cactus, Large<br>roundleaved prickly pear    | 1a                                                                        |
| 245 | <i>Opuntia stricta</i> (Haw.) Haw.<br>(= <i>O. dillennii</i> (Ker Gawl.) Haw.)                                                                    | Pest pear of Australia                                | 1b                                                                        |
| 246 | <i>Orobanche minor</i> Sm.                                                                                                                        | Lesser broomrape, Clover<br>broomrape                 | 1b                                                                        |
| 247 | <i>Orobanche ramosa</i> L.                                                                                                                        | Blue broomrape, Branched<br>broomrape                 | 1b                                                                        |
| 248 | <i>Paraserianthes lophantha</i> (Willd.)<br>I.C.Nielsen<br>(= <i>Albizia lophantha</i> (Willd.) Benth.)                                           | Australian albizia, Stink bean                        | 1b                                                                        |
| 249 | <i>Parkinsonia aculeata</i> L.                                                                                                                    | Jerusalem thorn                                       | Category 5 in North West and Northern<br>Cape                             |
| 250 | <i>Parthenium hysterophorus</i> L.                                                                                                                | Parthenium                                            | 1b                                                                        |
| 251 | <i>Paspalum dilatatum</i> Poir.                                                                                                                   | Common paspalum                                       | 5                                                                         |
| 252 | <i>Paspalum quadrifarium</i> Lam.                                                                                                                 |                                                       | 1a                                                                        |
| 253 | <i>Paspalum urvillei</i> Steud.                                                                                                                   | Tall paspalum                                         | 5                                                                         |
| 254 | <i>Passiflora caerulea</i> L.                                                                                                                     | Blue passion flower                                   | 1b                                                                        |
| 255 | <i>Passiflora edulis</i> Sims                                                                                                                     | Purple granadilla, Passion fruit                      | Category 2 in KwaZulu-Natal,<br>Mpumalanga, Limpopo and Eastern<br>Cape.  |
| 256 | <i>Passiflora tripartita</i> (Juss.) Poir. var.<br><i>mollissima</i> (Kunth) Holm-Niels. & P.Jorg.<br>(= <i>P. mollissima</i> (Kunth) L.H.Bailey) | Banana poka, Bananadilla                              | 1b                                                                        |
| 257 | <i>Passiflora suberosa</i> L.                                                                                                                     | Devil's pumpkin, Indigo berry                         | 1b                                                                        |
| 258 | <i>Passiflora subpeltata</i> Ortega                                                                                                               | Granadina                                             | 1a                                                                        |
| 259 | <i>Paulownia tomentosa</i> (Thunb.) Steud.<br>(= <i>Paulownia imperialis</i> Siebold & Zucc.)                                                     | Empress tree, Princess tree, Royal<br>Paulownia       | 1b                                                                        |
| 260 | <i>Pennisetum clandestinum</i> Hochst. ex<br>Chiov.                                                                                               | Kikuyu grass                                          | 2 (This can be demarcated in areas<br>broader than individual properties) |
| 261 | <i>Pennisetum purpureum</i> Schumach.                                                                                                             | Elephant grass, Napier grass                          | 1b                                                                        |
| 262 | <i>Pennisetum setaceum</i> (Forssk.) Chiov.<br>Excluding sterile cultivar 'Rubrum'                                                                | Fountain grass                                        | 1b                                                                        |
| 263 | <i>Pennisetum villosum</i> R.Br. ex Fresen.                                                                                                       | Feathertop                                            | 1b                                                                        |
| 264 | <i>Pereskia aculeata</i> Mill.                                                                                                                    | Pereskia, Barbados gooseberry                         | 1b                                                                        |
| 265 | <i>Persicaria capitata</i> (Buch.-Ham. ex D.Don)<br>H.Gross (= <i>Polygonum capitatum</i> Buch.-<br>Ham. ex D.Don)                                | Knotweed                                              | 1a                                                                        |
| 266 | <i>Persicaria limbata</i> (Meisn.) H.Hara<br>(= <i>Polygonum limbatum</i> Meisn.)                                                                 | Knotweed                                              | 5                                                                         |
| 267 | <i>Phytolacca dioica</i> L.                                                                                                                       | Belhambra                                             | 3                                                                         |
| 268 | <i>Phytolacca icosandra</i> L.<br>(= <i>P. octandra</i> L.)                                                                                       | Forest inkberry                                       | 1b                                                                        |
| 269 | <i>Pinus canariensis</i> C.Sm.                                                                                                                    | Canary pine                                           | 3                                                                         |
| 270 | <i>Pinus elliotii</i> Engelm.                                                                                                                     | Slash pine                                            | 2                                                                         |
| 271 | <i>Pinus halepensis</i> Mill.                                                                                                                     | Aleppo pine                                           | 2                                                                         |
| 272 | <i>Pinus patula</i> Schiede ex Schltdl. & Cham.                                                                                                   | Patula pine                                           | 2                                                                         |
| 273 | <i>Pinus pinaster</i> Aiton                                                                                                                       | Cluster pine                                          | 2                                                                         |
| 274 | <i>Pinus pinea</i> L.                                                                                                                             | Umbrella or Stone pine                                | 5                                                                         |
| 275 | <i>Pinus radiata</i> D.Don                                                                                                                        | Radiata pine, Monterey pine                           | 2                                                                         |
| 276 | <i>Pinus roxburghii</i> Sarg.<br>(= <i>P. longifolia</i> Roxb. ex Lamb.)                                                                          | Chir pine, Longifolia pine                            | 2                                                                         |
| 277 | <i>Pinus taeda</i> L.                                                                                                                             | Loblolly pine                                         | 2                                                                         |
| 278 | <i>Pistia stratiotes</i> L.                                                                                                                       | Water lettuce                                         | 1a                                                                        |
| 279 | <i>Pittosporum crassifolium</i> Banks & Sol. ex<br>A.Cunn.                                                                                        | Karo, Stiff-leaved cheesewood                         | 3                                                                         |
| 280 | <i>Pittosporum undulatum</i> Vent.                                                                                                                | Australian cheesewood, Sweet<br>pittosporum           | 1a                                                                        |
| 281 | <i>Plectranthus comosus</i> Sims<br>(= <i>Coleus grandis</i> Cramer)<br>( <i>Plectranthus barbatus</i> misapplied in<br>South Africa)             | 'Abyssinian' coleus, Woolly<br>plectranthus           | 1b                                                                        |
| 282 | <i>Poa pratensis</i> L.                                                                                                                           | Kentucky bluegrass                                    | Category 1a on Prince Edward Island.<br>Category 1b on Marion Island      |

|     |                                                                                                                                    |                               |                                                                                                                                                                                                                                                                             |
|-----|------------------------------------------------------------------------------------------------------------------------------------|-------------------------------|-----------------------------------------------------------------------------------------------------------------------------------------------------------------------------------------------------------------------------------------------------------------------------|
| 283 | <i>Polypodium aureum</i> (L.) J.Sm.                                                                                                | Rabbits-foot fern             | Category 3 in KwaZulu-Natal, Mpumalanga, Limpopo and Eastern Cape                                                                                                                                                                                                           |
| 284 | <i>Pontederia cordata</i> L.                                                                                                       | Pickerel weed                 | 1a                                                                                                                                                                                                                                                                          |
| 285 | <i>Populus alba</i> L.                                                                                                             | White poplar                  | 2                                                                                                                                                                                                                                                                           |
| 286 | <i>Populus deltoides</i> W.Bartram ex Marshall subsp. <i>deltoides</i>                                                             | Match poplar                  | 5                                                                                                                                                                                                                                                                           |
| 287 | <i>Populus deltoides</i> W.Bartram ex Marshall subsp. <i>wislizeni</i> (S.Watson) Eckenw. (= <i>P. wislizeni</i> (S.Watson) Sarg.) | Valley match poplar           | 5                                                                                                                                                                                                                                                                           |
| 288 | <i>Populus nigra</i> L. var. <i>italica</i> Münchh.                                                                                | Lombardy poplar               | 5                                                                                                                                                                                                                                                                           |
| 289 | <i>Populus xcanescens</i> (Aiton) Sm.                                                                                              | Grey poplar, Matchwood poplar | 2                                                                                                                                                                                                                                                                           |
| 290 | <i>Prosopis glandulosa</i> Torr. var. <i>torreyana</i> (Benson) Johnst. and hybrids                                                | Honey mesquite                | Category 1b in North West, Free State, Eastern and Western Cape. Category 2 in Northern Cape                                                                                                                                                                                |
| 291 | <i>Prosopis velutina</i> Wooton and hybrids                                                                                        | Velvet mesquite               | Category 1b in North West, Free State, Eastern and Western Cape, Category 2 in Northern Cape                                                                                                                                                                                |
| 292 | <i>Protea aurea</i> and all derived fertile hybrids                                                                                | Long-bud protea               | Category 4<br>Not permitted outside of natural range in the Western Cape, Eastern Cape and KwaZulu-Natal within 5 km of natural populations of other members of White Water Proteas ( <i>P. lacticolor</i> , <i>P. mundii</i> , <i>P. punctata</i> , <i>P. subvestita</i> ) |
| 293 | <i>Protea lacticolor</i> and all derived fertile hybrids                                                                           | Hottentot white protea        | Category 4<br>Not permitted outside of natural range in the Western Cape, Eastern Cape and KwaZulu-Natal within 5 km of natural populations of other members of White Water Proteas ( <i>P. aurea</i> , <i>P. mundii</i> , <i>P. punctata</i> , <i>P. subvestita</i> )      |
| 294 | <i>Protea longifolia</i> and all derived fertile hybrids                                                                           |                               | Category 4<br>Not permitted within the Western and Eastern Cape outside of its natural range (i.e. Fynbos outside of Kogelberg and Overberg Sandstone Fynbos)                                                                                                               |
| 295 | <i>Protea mundii</i> and all derived fertile hybrids                                                                               | White protea                  | Category 4<br>Not permitted outside of natural range in the Western Cape, Eastern Cape and KwaZulu-Natal within 5 km of natural populations of other members of White Water Proteas ( <i>P. aurea</i> , <i>P. lacticolor</i> , <i>P. punctata</i> , <i>P. subvestita</i> )  |
| 296 | <i>Protea neriifolia</i>                                                                                                           | Oleander - leaved protea      | Category 4<br>Not permitted within the distribution range of <i>Protea lepidocarpodendron</i> or 1 km thereof. (Cape Peninsula, Helderberg, coastal towns and mountains from Pringle Bay to Stanford)                                                                       |
| 297 | <i>Protea punctata</i> and all derived fertile hybrids                                                                             | Water white sugarbush         | Category 4<br>Not permitted outside of natural range in the Western Cape, Eastern Cape and KwaZulu-Natal within 5 km of natural populations of other members of White Water Proteas ( <i>P. aurea</i> , <i>P. lacticolor</i> , <i>P. mundii</i> , <i>P. subvestita</i> )    |
| 298 | <i>Protea subvestita</i> and all derived fertile hybrids                                                                           | Lipped protea                 | Category 4<br>Not permitted outside of natural range in the Western Cape and Eastern Cape within 5 km of natural populations of other members of White Water Proteas ( <i>P. aurea</i> , <i>P. lacticolor</i> , <i>P. mundii</i> , <i>P. punctata</i> ).                    |
| 299 | <i>Protea susannae</i> and all derived fertile hybrids                                                                             | Stinkleaf protea              | Category 4<br>Not permitted within the Western and Eastern Cape outside of its natural range (i.e. Fynbos outside of Agulhas Plain, and Agulhas, De Hoop & Canca Limestone Fynnos)                                                                                          |
| 300 | <i>Prunus cerasifera</i> Ehrh.                                                                                                     | Cherry plum                   | 5                                                                                                                                                                                                                                                                           |
| 301 | <i>Prunus serotina</i> Ehrh.                                                                                                       | Black cherry                  | 3                                                                                                                                                                                                                                                                           |
| 302 | <i>Psidium cattleianum</i> Sabine (= <i>P. littorale</i> Raddi var. <i>longipes</i> (O.Berg.) Fosberg)                             | Strawberry guava              | 1b                                                                                                                                                                                                                                                                          |
| 303 | <i>Psidium guajava</i> L. and hybrids                                                                                              | Guava                         | Category 2 in KwaZulu-Natal,                                                                                                                                                                                                                                                |



|     |                                                                                                                                                        |                                                   | Mpumalanga, Limpopo and the Eastern Cape                                                                   |
|-----|--------------------------------------------------------------------------------------------------------------------------------------------------------|---------------------------------------------------|------------------------------------------------------------------------------------------------------------|
| 304 | <i>Psidium guineense</i> Sw.                                                                                                                           | Brazilian guava                                   | 1a                                                                                                         |
| 305 | <i>Psidium xdurbanensis</i> Baijnath ined.                                                                                                             | Durban guava                                      | 1a                                                                                                         |
| 306 | <i>Pterocarya fraxinifolia</i> (Lam. ex Poir.) Spach.                                                                                                  | Caucasian wing nut                                | 5                                                                                                          |
| 307 | <i>Pueraria montana</i> (Lour.) Merr. var. <i>lobata</i> (Willd.) Maesen & S.M.Almeida (= <i>P. lobata</i> (Willd.) Ohwi)                              | Kudzu vine                                        | 1a                                                                                                         |
| 308 | <i>Pyracantha angustifolia</i> (Franch.) C.K.Schneid.                                                                                                  | Yellow firethorn                                  | 1b                                                                                                         |
| 309 | <i>Pyracantha coccinea</i> M.Roem.                                                                                                                     | Red firethorn                                     | 5                                                                                                          |
| 310 | <i>Pyracantha crenatoserrata</i> (Hance) Rehder (= <i>P. fortuneana</i> misapplied)                                                                    | Chinese firethorn, Broad leaf firethorn           | 5                                                                                                          |
| 311 | <i>Pyracantha crenulata</i> (D.Don) M.Roem.                                                                                                            | Himalayan firethorn                               | 1b                                                                                                         |
| 312 | <i>Pyracantha koidzumii</i> (Hayata) Rehder                                                                                                            | Formosa firethorn                                 | 5                                                                                                          |
| 313 | <i>Pyracantha rogersiana</i> (A.B.Jacks.) Chitt.                                                                                                       | Firethorn                                         | 5                                                                                                          |
| 314 | <i>Quercus acutissima</i> Carruth.                                                                                                                     | Bristle oak                                       | 5                                                                                                          |
| 315 | <i>Raphanus raphanistrum</i> L.                                                                                                                        | Wild radish                                       | 5                                                                                                          |
| 316 | <i>Rhus glabra</i> L.                                                                                                                                  | Scarlet sumach, Vinegar bush                      | 3                                                                                                          |
| 317 | <i>Ricinus communis</i> L.                                                                                                                             | Castor-oil plant                                  | 2                                                                                                          |
| 318 | <i>Rivina humilis</i> L.                                                                                                                               | Rivina, Bloodberry                                | 1a                                                                                                         |
| 319 | <i>Robinia pseudoacacia</i> L.                                                                                                                         | Black locust                                      | 1b                                                                                                         |
| 320 | <i>Rosa canina</i> L.                                                                                                                                  | Dog-rose                                          | 5                                                                                                          |
| 321 | <i>Rosa rubiginosa</i> L. (= <i>R. eglanteria</i> L.)                                                                                                  | Eglantine, Sweetbriar                             | 1b                                                                                                         |
| 322 | <i>Rubus cuneifolius</i> Pursh and hybrid <i>R. xproteus</i> C.H.Stirt.                                                                                | American bramble                                  | 1b                                                                                                         |
| 323 | <i>Rubus flagellaris</i> Willd.                                                                                                                        | Bramble                                           | 1a                                                                                                         |
| 324 | <i>Rubus fruticosus</i> L. agg.                                                                                                                        | European blackberry                               | 2                                                                                                          |
| 325 | <i>Rubus niveus</i> Thunb.                                                                                                                             | Ceylon raspberry, Mysore raspberry                | 1b                                                                                                         |
| 326 | <i>Rumex acetosella</i> L.                                                                                                                             | Sheep sorrel, Red sorrel                          | Category 1a on Prince Edward and Marion Islands                                                            |
| 327 | <i>Rumex crispus</i> L.                                                                                                                                | Curly dock                                        | 5                                                                                                          |
| 328 | <i>Salix babylonica</i> L.                                                                                                                             | Weeping willow                                    | 3                                                                                                          |
| 329 | <i>Salix fragilis</i> L.                                                                                                                               | Crack or Brittle willow                           | 1b                                                                                                         |
| 330 | <i>Salsola kali</i> L.                                                                                                                                 | Tumbleweed                                        | 1b                                                                                                         |
| 331 | <i>Salsola tragus</i> L. (= <i>S. australis</i> R.Br.)                                                                                                 | Russian tumbleweed                                | 1b                                                                                                         |
| 332 | <i>Salvia tiliifolia</i> Vahl                                                                                                                          | Lindenleaf sage                                   | 1b                                                                                                         |
| 333 | <i>Salvinia molesta</i> D.S.Mitch. and other species of the Family Salviniaceae                                                                        | Kariba weed, Salvinia                             | 1a                                                                                                         |
| 334 | <i>Sambucus canadensis</i> L. (= <i>S. nigra</i> L. subsp. <i>canadensis</i> (L.) Bolli                                                                | Canadian elder                                    | 1b                                                                                                         |
| 335 | <i>Sambucus nigra</i> L.                                                                                                                               | European elder                                    | 1b                                                                                                         |
| 336 | <i>Sasa ramosa</i> (Makino) Makino & Shibata (= <i>Arundinaria vagans</i> Gamble)                                                                      | Dwarf yellow-striped bamboo                       | 3                                                                                                          |
| 337 | <i>Schefflera actinophylla</i> (Endl.) Harms                                                                                                           | Australian cabbage tree, Queensland umbrella tree | Category 1b in KwaZulu-Natal, Mpumalanga, Limpopo and Eastern Cape                                         |
| 338 | <i>Schefflera arboricola</i> (Hayata) Merr.                                                                                                            | Dwarf umbrella tree                               | Category 3 in KwaZulu-Natal, Mpumalanga, Limpopo and Eastern Cape                                          |
| 339 | <i>Schefflera elegantissima</i> (hort. Veitch ex Mast.) Lowry & Frodin (= <i>Dizygotheca elegantissima</i> (hort. Veitch ex Mast.) R.Vig. & Guillaumin | False aralia                                      | 5                                                                                                          |
| 340 | <i>Schinus molle</i> L.                                                                                                                                | Pepper tree                                       | 5                                                                                                          |
| 341 | <i>Schinus terebinthifolius</i> Raddi                                                                                                                  | Brazilian pepper tree                             | 1b                                                                                                         |
| 342 | <i>Senna bicapsularis</i> (L.) Roxb. (= <i>Cassia bicapsularis</i> L.)                                                                                 | Rambling cassia                                   | 1b                                                                                                         |
| 343 | <i>Senna didymobotrya</i> (Fresen.) H.S.Irwin & Barneby (= <i>Cassia didymobotrya</i> Fresen.)                                                         | Peanut butter cassia                              | Category 1b in KwaZulu-Natal, Mpumalanga, Limpopo and Eastern Cape. Category 3 in the rest of South Africa |
| 344 | <i>Senna hirsuta</i> (L.) H.S.Irwin & Barneby (= <i>Cassia hirsuta</i> L.)                                                                             |                                                   | 1b                                                                                                         |
| 345 | <i>Senna occidentalis</i> (L.) Link (= <i>Cassia occidentalis</i> L.)                                                                                  | Stinking weed, Wild coffee                        | 1b                                                                                                         |
| 346 | <i>Senna pendula</i> (Willd.) H.S.Irwin & Barneby var. <i>glabrata</i> (Vogel) H.S.Irwin & Barneby (= <i>Cassia coluteoides</i> Collad.)               |                                                   | 1b                                                                                                         |
| 347 | <i>Senna septemtrionalis</i> (Viv.) H.S.Irwin & Barneby (= <i>Cassia floribunda</i> sensu Brenan non                                                   | Arsenic bush, Smooth senna                        | 1b                                                                                                         |

|     |                                                                                                                                                |                                                |                                                                                                        |
|-----|------------------------------------------------------------------------------------------------------------------------------------------------|------------------------------------------------|--------------------------------------------------------------------------------------------------------|
|     | Cav., <i>C. laevigata</i> Willd.)                                                                                                              |                                                |                                                                                                        |
| 348 | <i>Sesbania punicea</i> (Cav.) Benth.                                                                                                          | Red sesbania                                   | 1b                                                                                                     |
| 349 | <i>Solanum betaceum</i> Cav.<br>(= <i>Cyphomandra betacea</i> (Cav.) Sendtn.)                                                                  | Tree tomato                                    | 5                                                                                                      |
| 350 | <i>Solanum chrysotrichum</i> Schtdl.<br>( <i>S. hispidum</i> misapplied in South Africa)                                                       | Giant devil's fig                              | 1b                                                                                                     |
| 351 | <i>Solanum elaeagnifolium</i> Cav.                                                                                                             | Silver-leaf bitter apple                       | 1b                                                                                                     |
| 352 | <i>Solanum mauritianum</i> Scop.                                                                                                               | Bugweed                                        | 1b                                                                                                     |
| 353 | <i>Solanum pseudocapsicum</i> L.                                                                                                               | Jerusalem cherry                               | Category 1a in coastal areas, Mpumalanga and Limpopo. Category 1b in rest of South Africa              |
| 354 | <i>Solanum seaforthianum</i> Andrews                                                                                                           | Potato creeper                                 | 1b                                                                                                     |
| 355 | <i>Solanum sisymbriifolium</i> Lam.                                                                                                            | Wild tomato, Dense-thorned bitter apple        | 1b                                                                                                     |
| 356 | <i>Sorghum halepense</i> (L.) Pers.                                                                                                            | Johnson grass, Aleppo grass                    | 2                                                                                                      |
| 357 | <i>Spartium junceum</i> L.                                                                                                                     | Spanish broom                                  | Category 1a in Western Cape                                                                            |
| 358 | <i>Spathodea campanulata</i> P.Beauv.                                                                                                          | African flame tree                             | Category 3 in KwaZulu-Natal, Mpumalanga, Limpopo and Eastern Cape                                      |
| 359 | <i>Sphagneticola trilobata</i> (L.) Pruski<br>(= <i>Thelechitonia trilobata</i> (L.) H.Rob. & Cuatrec., <i>Wedelia trilobata</i> (L.) Hitchc.) | Singapore daisy                                | Category 1b in KwaZulu-Natal, Mpumalanga, Limpopo. Category 3 in rest of South Africa                  |
| 360 | <i>Stachytarpheta</i> spp.                                                                                                                     | Snakeweeds                                     | 3                                                                                                      |
| 361 | <i>Stellaria media</i> (L.) Vill.                                                                                                              | Common chickweed                               | Category 1a on Prince Edward Island and 1b on Marion Island                                            |
| 362 | <i>Syncarpia glomulifera</i> (Sm.) Nied.                                                                                                       | Turpentine tree                                | 5                                                                                                      |
| 363 | <i>Syngonium</i> spp.                                                                                                                          | Goose foot plants, Arrow-head vines            | Category 1a in KwaZulu-Natal, Mpumalanga, Limpopo and Eastern Cape                                     |
| 364 | <i>Syzygium cumini</i> (L.) Skeels                                                                                                             | Jambolan                                       | Category 1b in KwaZulu-Natal, Mpumalanga, Limpopo. Category 1b in the rest of South Africa             |
| 365 | <i>Syzygium jambos</i> (L.) Alston                                                                                                             | Rose apple                                     | 3                                                                                                      |
| 366 | <i>Syzygium paniculatum</i> Gaertn.<br>(= <i>Eugenia myrtifolia</i> Sims)                                                                      | Australian water-pear, Australian brush-cherry | 5                                                                                                      |
| 367 | <i>Tamarix aphylla</i> (L.) H.Karst.<br>Not to be confused with indigenous <i>Tamarix usneoides</i>                                            | Athel tree, Desert tamarisk                    | 1b                                                                                                     |
| 368 | <i>Tamarix chinensis</i> Lour.<br>Not to be confused with indigenous <i>Tamarix usneoides</i>                                                  | Chinese tamarisk                               | 1b                                                                                                     |
| 369 | <i>Tamarix gallica</i> L.<br>Not to be confused with indigenous <i>Tamarix usneoides</i>                                                       | French tamarisk                                | 1b                                                                                                     |
| 370 | <i>Tamarix ramosissima</i> Ledeb.<br>Not to be confused with indigenous <i>Tamarix usneoides</i>                                               | Pink tamarisk                                  | 1b                                                                                                     |
| 371 | <i>Tecoma stans</i> (L.) Juss. ex Kunth                                                                                                        | Yellow bells                                   | 1b                                                                                                     |
| 372 | <i>Thevetia peruviana</i> (Pers.) K.Schum.<br>(= <i>T. nerifolia</i> Juss. ex Steud.)                                                          | Yellow oleander                                | 1b                                                                                                     |
| 373 | <i>Tipuana tipu</i> (Benth.) Kuntze<br>(= <i>T. speciosa</i> Benth.)                                                                           | Tipu tree                                      | 3                                                                                                      |
| 374 | <i>Tithonia diversifolia</i> (Hemsl.) A.Gray                                                                                                   | Mexican sunflower                              | 1b                                                                                                     |
| 375 | <i>Tithonia rotundifolia</i> (Mill.) S.F.Blake                                                                                                 | Red sunflower                                  | 1b                                                                                                     |
| 376 | <i>Toona ciliata</i> M.Roem.<br>(= <i>Cedrela toona</i> Roxb. ex Willd.)                                                                       | Toon tree                                      | 3                                                                                                      |
| 377 | <i>Toxicodendron succedaneum</i> (L.) Kuntze<br>(= <i>Rhus succedanea</i> L.)                                                                  | Wax tree                                       | 1a                                                                                                     |
| 378 | <i>Tradescantia fluminensis</i> Vell.                                                                                                          | Wandering Jew                                  | 1a                                                                                                     |
| 379 | <i>Tradescantia pallida</i> (Rose) D.R.Hunt<br>(= <i>Setcreasea purpurea</i> Boom)                                                             | Purpleheart                                    | 5                                                                                                      |
| 380 | <i>Tradescantia spathacea</i> Sw.<br>(= <i>Rhoeo spathacea</i> (Sw.) Stearn)                                                                   | Boat lily                                      | 5                                                                                                      |
| 381 | <i>Tradescantia zebrina</i> hort. ex Bosse<br>(= <i>Zebrina pendula</i> Schnizl.)                                                              | Wandering Jew                                  | 1a                                                                                                     |
| 382 | <i>Triplaris americana</i> L.                                                                                                                  | Triplaris, Ant tree                            | Category 1a in KwaZulu-Natal, Mpumalanga, Limpopo and Eastern Cape. Category 5 in rest of South Africa |
| 383 | <i>Ulex europaeus</i> L.                                                                                                                       | European gorse                                 | 1b                                                                                                     |
| 384 | <i>Ulmus parvifolia</i> Jacq.<br>(= <i>U. chinensis</i> Pers.)                                                                                 | Chinese elm                                    | 5                                                                                                      |
| 385 | <i>Verbena bonariensis</i> L.                                                                                                                  | Wild verbena, Tall verbena, Purple top         | 1b                                                                                                     |
| 386 | <i>Verbena brasiliensis</i> Vell.                                                                                                              | Brazilian verbena                              | 1b                                                                                                     |
| 387 | <i>Vinca major</i> L.                                                                                                                          | Greater periwinkle                             | 5                                                                                                      |
| 388 | <i>Vinca minor</i> L.                                                                                                                          | Lesser periwinkle                              | 5                                                                                                      |

|     |                                                                                                                    |                         |                                                                    |
|-----|--------------------------------------------------------------------------------------------------------------------|-------------------------|--------------------------------------------------------------------|
| 389 | <i>Vitex trifolia</i> L.                                                                                           | Indian three-leaf vitex | Category 1a in KwaZulu-Natal, Mpumalanga, Limpopo and Eastern Cape |
| 390 | <i>Wigandia urens</i> (Ruiz & Pav.) Kunth var. <i>caracasana</i> (Kunth) D.N.Gibson (= <i>W. caracasana</i> Kunth) | Wigandia                | 5                                                                  |
| 391 | <i>Xanthium spinosum</i> L.                                                                                        | Spiny cocklebur         | 1b                                                                 |
| 392 | <i>Xanthium strumarium</i> L.                                                                                      | Large cocklebur         | 1b                                                                 |

### 3.10 Microbes

Still under discussion.

## Appendix 4

### Species Listed as Known to be Invasive Elsewhere in the World

#### 4.1 Mammals

No species listed at present.

#### 4.2 Birds

No species listed at present.

#### 4.3 Reptiles

No species listed at present.

#### 4.4 Amphibians

| No | Species               | Common Name         |
|----|-----------------------|---------------------|
| 1  | <i>Xenopus laevis</i> | African clawed frog |

#### 4.5 Fishes (Fresh-water)

| No | Species                            | Common name                       |
|----|------------------------------------|-----------------------------------|
| 1  | <i>Labeobarbus aeneus</i>          | Vaal-Orange smallmouth yellowfish |
| 2  | <i>Labeobarbus capensis</i>        | Clanwilliam yellowfish            |
| 3  | <i>Labeobarbus marequensis</i>     | Lowveld largescale yellowfish     |
| 4  | <i>Labeobarbus natalensis</i>      | KwaZulu-Natal yellowfish          |
| 5  | <i>Labeobarbus polylepis</i>       | Bushveld smallscale yellowfish    |
| 6  | <i>Labeo umbratus</i>              | Moggel                            |
| 7  | <i>Clarias gariepinus</i>          | sharptooth catfish                |
| 8  | <i>Clarias ngamensis</i>           | blunttooth catfish                |
| 9  | <i>Chetia brevis</i>               | orange-fringed largemouth         |
| 10 | <i>Chetia flaviventris</i>         | canary kurper                     |
| 11 | <i>Oreochromis mossambicus</i>     | Mocambique tilapia                |
| 12 | <i>Oreochromis placidus</i>        | black tilapia                     |
| 13 | <i>Pseudocrenilabrus philander</i> | southern mouthbrooder             |
| 14 | <i>Serranochromis meridianus</i>   | lowveld largemouth                |
| 15 | <i>Tilapia rendalli</i>            | redbreast tilapia                 |
| 16 | <i>Tilapia sparrmanii</i>          | banded tilapia                    |

#### 4.6 Fishes (Marine) and Other Marine Species

Still under discussion.

#### 4.7 Invertebrates (Fresh-water)

Still under discussion.

#### 4.8 Invertebrates (Terrestrial)

Still under discussion.

## 4.9 Plants

| No | Species                                                       | Common Name                         |
|----|---------------------------------------------------------------|-------------------------------------|
| 1  | <i>Acacia erioloba</i> E.Mey.                                 | Camel thorn                         |
| 2  | <i>Acacia karroo</i> Hayne                                    | Sweet thorn                         |
| 3  | <i>Acacia nilotica</i> (L.) Delile                            | Scented thorn                       |
| 4  | <i>Alectra</i> spp.                                           | Witchweeds                          |
| 5  | <i>Arctotheca calendula</i> (L.) Levyns                       | Cape marigold                       |
| 6  | <i>Aristea ecklonii</i> Baker                                 | Blue stars                          |
| 7  | <i>Aristolochia</i> spp.                                      | Calico flowers                      |
| 8  | <i>Asparagus africanus</i> Lam.                               | Haakdoring                          |
| 9  | <i>Asparagus asparagoides</i> (L.) Druce                      | Cape smilax, Bridal-creeper         |
| 10 | <i>Asparagus declinatus</i> L.                                | Bridal-veil                         |
| 11 | <i>Asparagus densiflorus</i> (Kunth) Jessop                   | Foxtail fern, Cat's tail asparagus  |
| 12 | <i>Asparagus scandens</i> Thunb.                              | Climbing asparagus, Ferny asparagus |
| 13 | <i>Asparagus setaceus</i> (Kunth) Jessop                      | Asparagus-fern                      |
| 14 | <i>Barleria prionitoides</i> Engl.                            | Barleria, Porcupine flower          |
| 15 | <i>Berkheya rigida</i> (Thunb.) Ewart et al.                  | African thistle                     |
| 16 | <i>Ceratophyllum demersum</i> L.                              | Water hornwort                      |
| 17 | <i>Chrysanthemoides monilifera</i> (L.) Norl                  | Bietou / Boneseed                   |
| 18 | <i>Cineraria lyratiformis</i> Cron                            | African marigold, Wild Parsley      |
| 19 | <i>Commelina benghalensis</i> L.                              | Benghal wandering Jew               |
| 20 | <i>Crocosmia X crocosmiiflora</i> (Lemoine) N.E.Br.           | Autumn-gold, Garden montbretia      |
| 21 | <i>Cucumis myriocarpus</i> Naudin                             | Striped wild cucumber               |
| 22 | <i>Cuscuta</i> spp.                                           | Dodders                             |
| 23 | <i>Cynodon</i> spp.                                           | Couch-grasses, Quick grasses        |
| 24 | <i>Cyperus esculentus</i> L.                                  | Yellow nutsedge                     |
| 25 | <i>Cyperus rotundus</i> L.                                    | Purple nutsedge                     |
| 26 | <i>Delairea odorata</i> Lem.                                  | Cape ivy, Ivy groundsel             |
| 27 | <i>Dichrostachys cinerea</i> (L.) Wight & Arn.                | Sickle bush                         |
| 28 | <i>Digitaria scalarum</i> (Schweinf.) Chiov.                  | African finger grass                |
| 29 | <i>Digitaria velutina</i> (Forssk.) P.Beauv.                  | Long-plumed finger-grass            |
| 30 | <i>Dipogon lignosus</i> (L.) Verdc.                           | Wild bean                           |
| 31 | <i>Ehrharta erecta</i> Lam.                                   | Panic veld grass                    |
| 32 | <i>Ehrharta villosa</i> Schult.f.                             | Pipe grass                          |
| 33 | <i>Emex australis</i> Steinh.                                 | Spiny emex                          |
| 34 | <i>Eragrostis curvula</i> (Schrad.) Nees                      | African love grass                  |
| 35 | <i>Galenia pubescens</i> (Eckl. & Zeyh.) Druce                | Bloubrakbossie                      |
| 36 | <i>Galium spurium</i> L.                                      | Catchweed                           |
| 37 | <i>Gloriosa superba</i> L.                                    | Flame-lily, Glory-lily              |
| 38 | <i>Gomphocarpus fruticosus</i> (L.) W.T.Aiton                 | Milkweed                            |
| 39 | <i>Heteropogon contortus</i> (L.) P.Beauv. ex Roem. & Schult. | Common spear grass                  |
| 40 | <i>Hydrocotyle verticillata</i> Thunb.                        | Hydrocotyle, Shield pennywort       |
| 41 | <i>Imperata cylindrica</i> (L.) P.Beauv.                      | Silver spike                        |
| 42 | <i>Ipomoea aquatica</i> Forssk.                               | Swamp morning-glory                 |
| 43 | <i>Lagarosiphon major</i> (Ridl.) Moss                        | African oxygen weed                 |
| 44 | <i>Leonotis nepetifolia</i> (L.) R.Br.                        | Lion's tail                         |
| 45 | <i>Leptochloa chinensis</i> (L.) Nees                         | Red sprangletop                     |
| 46 | <i>Limnophila indica</i> (L.) Druce                           | Ambulia                             |
| 47 | <i>Lycium ferocissimum</i> Miers                              | African box thorn                   |
| 48 | <i>Lygodium microphyllum</i> (Cav.) R.Br.                     | Climbing maidenhair fern            |
| 49 | <i>Melianthus comosus</i> Vahl                                | Tufted honey flower                 |
| 50 | <i>Melianthus major</i> L.                                    | Large honey flower                  |
| 51 | <i>Mikania</i> spp.                                           | Mikania vines                       |
| 52 | <i>Mimosa pigra</i> L.                                        | Giant sensitive plant               |
| 53 | <i>Moraea</i> spp. (= <i>Homeria</i> spp.)                    | Cape tulips                         |
| 54 | <i>Najas marina</i> L.                                        | Sawtooth, Spiny naiad               |
| 55 | <i>Ochna serrulata</i> (Hochst.) Walp.                        | Small-leaved plane                  |
| 56 | <i>Olea europaea</i> (Mill.) P.S.Green subsp. <i>africana</i> | Olive                               |
| 57 | <i>Oncosiphon suffruticosum</i> (L.) Källersjö                | Karoobush                           |
| 58 | <i>Oryza longistaminata</i> A.Chev. & Roehr.                  | Red rice                            |
| 59 | <i>Oryza punctata</i> Kotschy ex Steud.                       | Red rice                            |
| 60 | <i>Osmunda regalis</i> L.                                     | Royal fern                          |
| 61 | <i>Oxalis pes-caprae</i> L.                                   | Yellow sorrel                       |
| 62 | <i>Panicum repens</i> L.                                      | Couch panicum                       |
| 63 | <i>Paspalum scrobiculatum</i> L.                              | Creeping paspalum, water couch      |
| 64 | <i>Pennisetum macrourum</i> Trin.                             | African feathergrass                |
| 65 | <i>Phragmites australis</i> (Cav.) Trin. ex Steud.            | Common reed                         |
| 66 | <i>Phyla</i> spp.                                             | Daisylawn, Capeweed                 |
| 67 | <i>Plectranthus ciliatus</i> E.Mey.                           | Speckled spurflower                 |
| 68 | <i>Plectranthus ecklonii</i> Benth.                           | Purple spurflower                   |
| 69 | <i>Polygala myrtifolia</i> L.                                 | September bush                      |
| 70 | <i>Rottboellia cochinchensis</i> (Lour.) Clayton              | Guinea-fowl grass                   |
| 71 | <i>Rumex saggitatus</i> Thunb.                                | Red sorrel                          |

|    |                                                                  |                                 |
|----|------------------------------------------------------------------|---------------------------------|
| 72 | <i>Selaginella kraussiana</i> (Kunze) A.Braun                    | Mat spike-moss                  |
| 73 | <i>Senecio angulatus</i> L.f.                                    | Cape ivy                        |
| 74 | <i>Senecio madagascariensis</i> Poir.                            | Fireweed                        |
| 75 | <i>Senecio pterophorus</i> DC.                                   | African daisy                   |
| 76 | <i>Setaria pumila</i> (Poir.) Roem. & Schult.                    | Pigeon grass, Yellow foxtail    |
| 77 | <i>Setaria verticillata</i> (L.) P.Beauv.                        | Sticky bristle grass            |
| 78 | <i>Sida acuta</i> Burm.f.                                        | Broomweed, Spiny-head sida      |
| 79 | <i>Sida cordifolia</i> L.                                        | Heartleaf sida                  |
| 80 | <i>Sida rhombifolia</i> L.                                       | Arrowleaf sida                  |
| 81 | <i>Silene vulgaris</i> (Moench) Garcke                           | Bladder campion, Maiden's-tears |
| 82 | <i>Solanum linneanum</i> Hepper & Jaeger                         | Bitter apple, Apple-of-Sodom    |
| 83 | <i>Sporobolus africanus</i> (Poir.) Robyns & Tournay             | Rat's tail grass                |
| 84 | <i>Sporobolus natalensis</i> (Steud.) T.Durand & Schinz          | Giant rat's tail grass          |
| 85 | <i>Sporobolus pyramidalis</i> P.Beauv.                           | Cat's tail grass                |
| 86 | <i>Striga asiatica</i> (L.) Kuntze                               | Common mealie-witchweed         |
| 87 | <i>Trapa</i> spp.                                                | Water chestnuts                 |
| 88 | <i>Tribulus terrestris</i> L.                                    | Devil's-thorn                   |
| 89 | <i>Triumfetta rhomboidea</i> Jacq.                               | Chinese bur                     |
| 90 | <i>Typha capensis</i> (Rohrb.) N.E.Br.                           | Common bulrush                  |
| 91 | <i>Typha domingensis</i> Pers. (= <i>T. australis</i> Schumach.) | Bulrush, Cattail                |
| 92 | <i>Utricularia gibba</i> L.                                      | Bladderwort                     |
| 93 | <i>Urochloa panicoides</i> P.Beauv.                              | Beesgras                        |
| 94 | <i>Vossia cuspidata</i> (Roxb.) Griff.                           | Hippo grass                     |
| 95 | <i>Watsonia meriana</i> (L.) Mill.                               | Dwarf red watsonia              |
| 96 | <i>Zantedeschia aethiopica</i> (L.) Spreng.                      | White arum lily                 |

#### 4.10 Microbes

Still under discussion.

## Appendix 5

### Species Listed as Potentially Invasive Elsewhere in the World

Seeds and other propagules of the following species must be labelled, informing people acquiring them that the species may be or may become invasive elsewhere in the world.

#### 5.1 Mammals

| No | Species                    | Common Name              |
|----|----------------------------|--------------------------|
| 1  | <i>Mastomys natalensis</i> | Natal multimammate mouse |

#### 5.2 Birds

No species listed at present.

#### 5.3 Reptiles

No species listed at present.

#### 5.4 Amphibians

No species listed at present.

#### 5.5 Fishes (Fresh-water)

| No | Species                           | Common name                       |
|----|-----------------------------------|-----------------------------------|
| 1  | <i>Labeobarbus kimberleyensis</i> | Vaal-Orange largemouth yellowfish |
| 2  | <i>Hydrocynus vittatus</i>        | Tigerfish                         |
| 3  | <i>Clarias theodora</i>           | snake catfish                     |

#### 5.6 Fishes (Marine) and Other Marine Species

Still under discussion.

#### 5.7 Invertebrates (Fresh-water)

Still under discussion.

#### 5.8 Invertebrates (Marine)

Still under discussion.

#### 5.9 Plants

| No | Species                                                                                 | Common Name             |
|----|-----------------------------------------------------------------------------------------|-------------------------|
| 1  | <i>Agapanthus praecox</i> Willd. subsp. <i>orientalis</i> (F. M. Leight.) F. M. Leight. | Common agapanthus       |
| 2  | <i>Aloe maculata</i> All. (= <i>A. saponaria</i> (Aiton) Haw.)                          | Soap aloe, Spotted aloe |
| 3  | <i>Amaryllis belladonna</i> L.                                                          | Belladonna lily         |
| 4  | <i>Anchusa capensis</i> Thunb.                                                          | Cape forget-me-not      |
| 5  | <i>Aponogeton distachyos</i> L.f.                                                       | Cape pondweed           |

|    |                                                                                                                      |                                                 |
|----|----------------------------------------------------------------------------------------------------------------------|-------------------------------------------------|
| 6  | <i>Aptenia cordifolia</i> (L.f.) Schwantes                                                                           | Aptenia                                         |
| 7  | <i>Arctotheca populifolia</i> (P.J.Bergius) Norl.                                                                    | Seepampoen                                      |
| 8  | <i>Arctotis stoechadifolia</i> P.J.Bergius                                                                           | Trailing arctotis                               |
| 9  | <i>Arctotis venusta</i> Norl.                                                                                        | Free State daisy                                |
| 10 | <i>Babiana stricta</i> (Aiton) Ker Gawl.                                                                             | Babiana                                         |
| 11 | <i>Babiana disticha</i> Ker Gawl.                                                                                    | Blue babiana                                    |
| 12 | <i>Babiana tubulosa</i> (Burm.f.) Ker Gawl.                                                                          | Babiana                                         |
| 13 | <i>Baeometra uniflora</i> (Jacq.) G.J.Lewis                                                                          |                                                 |
| 14 | <i>Bauhinia galpinii</i> N.E.Br.                                                                                     | Pride-of-De Kaap                                |
| 15 | <i>Buddleja saligna</i> Willd.                                                                                       | False olive                                     |
| 16 | <i>Buddleja salviifolia</i> (L.) Lam.                                                                                | Sagewood                                        |
| 17 | <i>Carpobrotus acinaciformis</i> (L.) L.Bolus                                                                        | Sour fig                                        |
| 18 | <i>Carpobrotus edulis</i> (L.) L.Bolus                                                                               | Yellow sour-fig, Hottentot fig                  |
| 19 | <i>Chasmanthe floribunda</i> (Salisb.) N.E.Br.                                                                       | Flames, Pennants                                |
| 20 | <i>Chloris gayana</i> Kunth                                                                                          | Hunyani grass, Rhodes grass                     |
| 21 | <i>Chloris virgata</i> Sw.                                                                                           | Feathertop chloris                              |
| 22 | <i>Chlorophytum comosum</i> (Thunb.) Jacq.                                                                           | Hen-and-chickens                                |
| 23 | <i>Citrillus lanatus</i> (Thunb.) Matsum. & Nakai                                                                    | Wild melon                                      |
| 24 | <i>Cleretum papulosum</i> (L.f.) L.Bolus (= <i>Micropterum papulosum</i> (L.f.) Schwantes)                           |                                                 |
| 25 | <i>Conicosia pugioniformis</i> (L.) N.E.Br.                                                                          |                                                 |
| 26 | <i>Cotula bipinnata</i> Thunb.                                                                                       |                                                 |
| 27 | <i>Cotula turbinata</i> L.                                                                                           | Goose daisy                                     |
| 28 | <i>Cotyledon orbiculata</i> L.                                                                                       | Pig's ear                                       |
| 29 | <i>Crassula</i> spp. and hybrids                                                                                     | Crassulas                                       |
| 30 | <i>Cyanella hyacinthoides</i> L.                                                                                     | Lady's-hand                                     |
| 31 | <i>Dactyloctenium australe</i> Steud.                                                                                | Durban grass, LM grass                          |
| 32 | <i>Delosperma litorale</i> (Kensit) L.Bolus                                                                          | Klipvygie                                       |
| 33 | <i>Dietes iridioides</i> (L.) Sweet ex Klatt (= <i>D. vegeta</i> (L.) N.E.Br.                                        | Wild iris                                       |
| 34 | <i>Dimorphotheca ecklonis</i> DC.                                                                                    | Blue-and-white daisy bush, Sunday's River daisy |
| 35 | <i>Dimorphotheca fruticosa</i> (L.) Less. (= <i>Osteospermum fruticosum</i> (L.) Norl.                               | Creeping marguerite                             |
| 36 | <i>Dimorphotheca jucunda</i> E.Phillips (= <i>Osteospermum jucundum</i> (E.Phillips) Norl.                           | Mountain bietou, Trailing mauve daisy           |
| 37 | <i>Dimorphotheca sinuata</i> DC.                                                                                     | Namaqualand daisy                               |
| 38 | <i>Disa bracteata</i> Sw. (= <i>Monadenia bracteata</i> (Sw.) T.Durand & Schinz                                      |                                                 |
| 39 | <i>Dischisma arenarium</i> E.Mey.                                                                                    |                                                 |
| 40 | <i>Dischisma capitatum</i> (Thunb.) Choisy                                                                           |                                                 |
| 41 | <i>Ehrharta brevifolia</i> Schrad.                                                                                   |                                                 |
| 42 | <i>Ehrharta calycina</i> Sm.                                                                                         | Veld grass                                      |
| 43 | <i>Ehrharta longiflora</i> Sm.                                                                                       |                                                 |
| 44 | <i>Erica baccans</i> L.                                                                                              | Berry heath                                     |
| 45 | <i>Euryops abrotanifolius</i> (L.) DC.                                                                               | Yellow marguerite                               |
| 46 | <i>Euryops subcarnosus</i> DC.                                                                                       |                                                 |
| 47 | <i>Ferraria crispa</i> Burm.                                                                                         | Spider flower                                   |
| 48 | <i>Freesia</i> spp. and hybrids                                                                                      | Freesias                                        |
| 49 | <i>Garuleum latifolium</i> Harv. (= <i>Osteospermum calendulaceum</i> Harv.)                                         |                                                 |
| 50 | <i>Gazania linearis</i> (Thunb.) Druce                                                                               | Gazania                                         |
| 51 | <i>Gazania rigens</i> (L.) Gaertn.                                                                                   | Trailing gazania                                |
| 52 | <i>Gladiolus</i> spp. and hybrids                                                                                    | Gladioli                                        |
| 53 | <i>Gomphocarpus physocarpus</i> E.Mey.                                                                               | Wild cotton                                     |
| 54 | <i>Gorteria personata</i> L.                                                                                         |                                                 |
| 55 | <i>Grammototheca bergiana</i> (Cham.) C.Presl                                                                        |                                                 |
| 56 | <i>Helichrysum petiolare</i> Hilliard & B.L.Burt                                                                     | Curry bush                                      |
| 57 | <i>Heliophila pusilla</i> L.f.                                                                                       |                                                 |
| 58 | <i>Hesperantha coccinea</i> (Backh. & Harv.) Goldblatt & J.C.Manning (= <i>Schizostylis coccinea</i> Backh. & Harv.) | Scarlet river lily                              |
| 59 | <i>Hesperantha falcata</i> (L.f.) Ker Gawl.                                                                          | Evening flower                                  |
| 60 | <i>Holcus setiger</i> Nees                                                                                           |                                                 |
| 61 | <i>Ixia maculata</i> L.                                                                                              | Yellow ixia                                     |
| 62 | <i>Ixia paniculata</i> D.Delaroche                                                                                   |                                                 |
| 63 | <i>Ixia polystachya</i> L.                                                                                           | Corn lily                                       |
| 64 | <i>Ixia viridiflora</i> Lam.                                                                                         | Green ixia                                      |
| 65 | <i>Juncus oxycarpus</i> E.Mey. ex Kunth                                                                              | Rush                                            |
| 66 | <i>Lachenalia aloides</i> (L.f.) Engl.                                                                               | Golden lachenalia                               |
| 67 | <i>Lachenalia bulbifera</i> (Cirillo) Engl.                                                                          | Red lachenalia                                  |
| 68 | <i>Lachenalia mutabilis</i> Sweet                                                                                    |                                                 |
| 69 | <i>Lachenalia reflexa</i> Thunb.                                                                                     |                                                 |
| 70 | <i>Lampranthus</i> spp. and hybrids                                                                                  | Vygies                                          |
| 71 | <i>Leonotis leonurus</i> (L.) R.Br.                                                                                  | Wild dagga                                      |
| 72 | <i>Lobelia</i> spp. and hybrids                                                                                      | Lobelias                                        |
| 73 | <i>Malephora crocea</i> (Jacq.) Schwantes                                                                            | Vingerkanna                                     |
| 74 | <i>Melinis repens</i> (Willd.) Zizka                                                                                 | Natal red-top                                   |



|     |                                                                                                               |                                    |
|-----|---------------------------------------------------------------------------------------------------------------|------------------------------------|
| 75  | <i>Mesembryanthemum aitonis</i> Jacq.                                                                         | Mesem, Ice plant                   |
| 76  | <i>Mesembryanthemum crystallinum</i> L.                                                                       | Mesem, Ice plant                   |
| 77  | <i>Mesembryanthemum nodiflorum</i> L.                                                                         | Mesem, Ice plant                   |
| 78  | <i>Monopsis debilis</i> (L.f.) C.Presl                                                                        |                                    |
| 79  | <i>Muraltia heisteria</i> (L.) DC.                                                                            |                                    |
| 80  | <i>Nemesia floribunda</i> Lehm.                                                                               | Leeubekkie                         |
| 81  | <i>Nemesia strumosa</i> (Herb. Banks ex Benth.) Benth.                                                        | Cape jewels                        |
| 82  | <i>Ornithogalum maximum</i> (Burm. f.) J.C. Manning & Goldblatt (= <i>Albuca canadensis</i> (L.) F.M.Leight.) |                                    |
| 83  | <i>Ornithogalum thyrsoides</i> Jacq.                                                                          | Chinkerinchee                      |
| 84  | <i>Oxalis compressa</i> L.f.                                                                                  | Sorrel                             |
| 85  | <i>Oxalis flava</i> L.                                                                                        | Yellow oxalis                      |
| 86  | <i>Oxalis glabra</i> Thunb.                                                                                   | Sorrel                             |
| 87  | <i>Oxalis incarnata</i> L.                                                                                    | Sorrel                             |
| 88  | <i>Oxalis purpurea</i> L.                                                                                     | Sorrel                             |
| 89  | <i>Pelargonium</i> spp. and hybrids                                                                           | Pelargoniums                       |
| 90  | <i>Pentaschistis airoides</i> (Nees) Stapf                                                                    | Haasgras                           |
| 91  | <i>Pentaschistis pallida</i> (Thunb.) H.P.Linder                                                              | Duingras, Haasgras                 |
| 92  | <i>Pentzia globosa</i> Less.                                                                                  | Globe flower                       |
| 93  | <i>Phygelius capensis</i> E.Mey. ex Benth.                                                                    | Cape fuchsia, River bells          |
| 94  | <i>Phyllopodium cordatum</i> (Thunb.) Hilliard                                                                |                                    |
| 95  | <i>Pittosporum viridiflorum</i> Sims                                                                          | Cheesewood                         |
| 96  | <i>Podalyria sericea</i> (Andrews) R.Br. ex W.T.Aiton                                                         | Silver water blossom pea           |
| 97  | <i>Polygala virgata</i> Thunb.                                                                                | Purple broom                       |
| 98  | <i>Psoralea pinnata</i> L.                                                                                    | Fountain bush                      |
| 99  | <i>Romulea flava</i> (Lam.) M.P.de Vos                                                                        |                                    |
| 100 | <i>Romulea minutiflora</i> Klatt                                                                              | Frutang                            |
| 101 | <i>Romulea obscura</i> Klatt                                                                                  | Frutang                            |
| 102 | <i>Romulea rosea</i> (L.) Eckl.                                                                               | Frutang, Pink romulea, Onion grass |
| 103 | <i>Senecio burchellii</i> DC.                                                                                 | Molteno disease plant              |
| 104 | <i>Senecio elegans</i> L.                                                                                     | Purple senecio                     |
| 105 | <i>Senecio glastifolius</i> L.f.                                                                              | Holly leaved senecio               |
| 106 | <i>Senecio tamoides</i> DC.                                                                                   | Canary creeper                     |
| 107 | <i>Sparaxis bulbifera</i> (L.) Ker Gawl.                                                                      | Dwarf sparaxis                     |
| 108 | <i>Sparaxis grandiflora</i> (D.Delaroche) Ker Gawl.                                                           | White sparaxis                     |
| 109 | <i>Sparaxis pillansii</i> L.Bolus                                                                             |                                    |
| 110 | <i>Sparaxis tricolor</i> (Schneev.) Ker Gawl.                                                                 | Sparaxis                           |
| 111 | <i>Sutherlandia frutescens</i> (L.) R.Br.                                                                     | Cancer bush                        |
| 112 | <i>Tecoma capensis</i> (Thunb.) Lindl.                                                                        | Cape honeysuckle                   |
| 113 | <i>Tetragonia decumbens</i> Mill.                                                                             |                                    |
| 114 | <i>Thunbergia alata</i> Sims                                                                                  | Black-eyed-susan                   |
| 115 | <i>Trachyandra divaricata</i> (Jacq.) Kunth                                                                   |                                    |
| 116 | <i>Tripteris clandestina</i> Less. (= <i>Osteospermum clandestinum</i> (Less.) Norl.                          |                                    |
| 117 | <i>Tritonia crocata</i> (L.) Ker Gawl.                                                                        | Blazing star                       |
| 118 | <i>Tritonia lineata</i> (Salisb.) Ker Gawl.                                                                   | Pencilled tritonia                 |
| 119 | <i>Ursinia anthemoides</i> (L.) Poir.                                                                         | Ringed rock ursinia                |
| 120 | <i>Wahlenbergia capensis</i> (L.) A.DC.                                                                       | Cape bell flower                   |
| 121 | <i>Watsonia borbonica</i> (Pourr.) Goldblatt and hybrids                                                      |                                    |
| 122 | <i>Watsonia marginata</i> (L.f.) Ker Gawl.                                                                    | Fairy watsonia                     |
| 123 | <i>Watsonia versfeldii</i> J.W.Mathews & L.Bolus                                                              |                                    |
| 124 | <i>Zaluzianskya divaricata</i> (Thunb.) Walp.                                                                 |                                    |

## 5.10 Microbes

Still under discussion.
